# Supplementary material for: Multifunctional multivalency: a focused library of polymeric cholera toxin antagonists
Source: Royal Society of Chemistry journal article supplement (doi:10.1039/c0ob01089h), 2011-01-01

# Multifunctional multivalency: a focused library of polymeric cholera toxin antagonists

Huu-Anh Tran,<sup>a,b</sup> Pavel I. Kitov,<sup>a</sup> Eugenia Paszkiewicz,<sup>a</sup>  
Joanna M. Sadowska,<sup>a</sup> and David R. Bundle<sup>a</sup>

<sup>a</sup> Alberta Ingenuity Centre for Carbohydrate Science, Department of Chemistry, University of Alberta, Edmonton, AB T6G 2G2, Canada. Fax: (+1)780-492-7705; Tel: (+1)780-492-8808; E-mail: [dave.bundle@ualberta.ca](mailto:dave.bundle@ualberta.ca)  
<sup>b</sup> TheraCarb Inc. 243-3553 31st Street N.W. Calgary, Alberta CANADA T2L 2K7

## ELISA Assay for Inhibition of Heat-labile Toxin (LT)

To PVC microtiter plates (Gibco BRL Inc.) solution of coating compound **9** (1 µg/mL, 100 µL/well) in PBS buffer was added and incubated at room temperature overnight, then washed (6×) with PBST (0.05 % Tween 20 in phosphate buffer saline, PBS). An inhibitor at decreasing concentrations (starting at 20 mg/mL, dilution factor 3.16; 50 µL/well) was mixed with LT (Sigma, 2 ng/mL) and the mixtures were applied to the plates. After incubation at room temperature for 2 h the plates were washed (6×) with PBST. Rabbit anti-LT polyclonal antibody (Abcam Inc., dilution 1:10000, 100 µL/well) was added, incubated at room temperature for 1 h then the plates were washed (6×) with PBST. Goat anti-rabbit IgG conjugated to horseradish peroxidase (Kirkegaard and Rerry Laboratories, dilution 1:5000, 100 µL/well) was added, incubated at room temperature for 30 min then the plates were washed (6×) with PBST. 3,3',5,5'-Tetramethylbenzidine solution (TMB purchased from KPL, 100 µL/well) was added. After 15 min incubation the reaction was stopped by addition of H<sub>3</sub>PO<sub>4</sub> (100 µL/well) and absorbance was measured at 450 nm.

**Table 1S.** Inhibitory activities of heterobifunctional polymers against LT.

| Alkyne derivative <b>7.n</b>                                                                       | α-Gal polymer       | IC <sub>50</sub> , µM <sup>a</sup> | β-Gal polymer       | IC <sub>50</sub> , µM <sup>a</sup> |
|----------------------------------------------------------------------------------------------------|---------------------|------------------------------------|---------------------|------------------------------------|
| 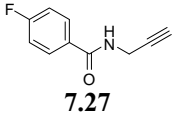<br><b>7.27</b> | <b>5α27</b> (3%)    | 0.00099<br>(h <sup>b</sup> =0.56)  | <b>5β27</b> (3%)    | 0.0011<br>(h <sup>b</sup> =0.8)    |
|                                                                                                    | <b>5α27</b> (5%)    | 0.00007<br>(h=0.54)                | <b>5β27</b> (5%)    | 0.0004<br>(h=0.95)                 |
|                                                                                                    | <b>5α27</b> (9%)    | 0.00015<br>(h=1.04)                | <b>5β27</b> (9%)    | 0.00023<br>(h=1.3)                 |
|                                                                                                    | <b>6α27</b> (6.6%)  | 0.0006<br>(h=0.76)                 | <b>6β27</b> (6.6%)  | 0.0017<br>(h=1.0)                  |
| <br><b>7.28</b> | <b>5α28</b><br>(5%) | 0.0029<br>(h=1.3)                  | <b>5β28</b><br>(5%) | 0.0034<br>(h=1.1)                  |
|                                                                                                    | <b>5α28</b><br>(9%) | 0.00007<br>(h=1.3)                 | <b>5β28</b><br>(9%) | 0.00013<br>(h=1.4)                 |
|                                                                                                    | <b>6α28</b> (6.6%)  | 0.00095<br>(h=0.8)                 | <b>6β28</b> (6.6%)  | 0.001<br>(h=0.74)                  |
|                                                                                                    | <b>6α28</b> (15%)   | 0.00019<br>(h=0.7)                 | <b>6β28</b> (15%)   | 0.00084<br>(h=0.7)                 |

<sup>a</sup> activities per pendant ligand. <sup>b</sup> Hill coefficient

## Selected $^1\text{H}$ , $^{13}\text{C}$ NMR and IR spectra

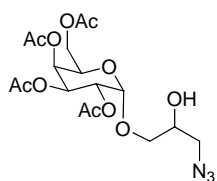

**3a**

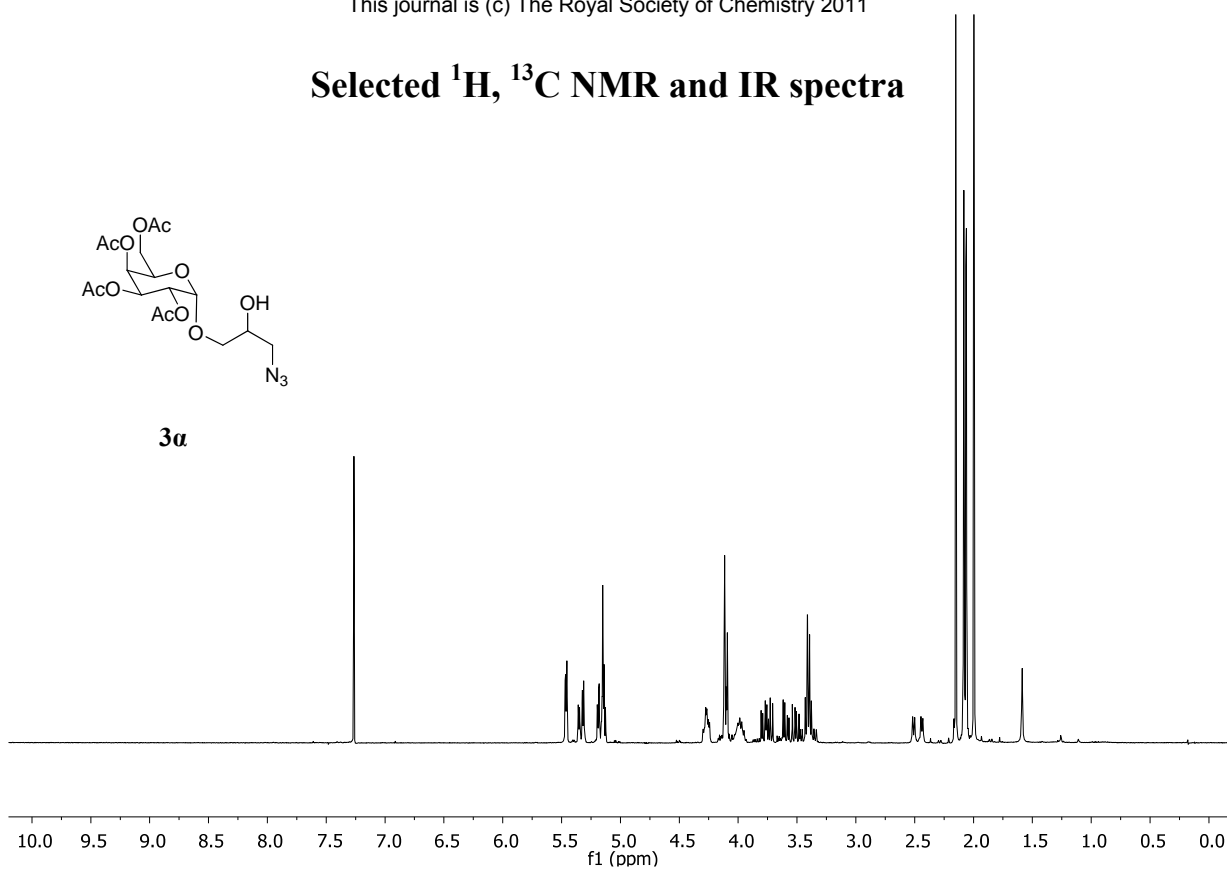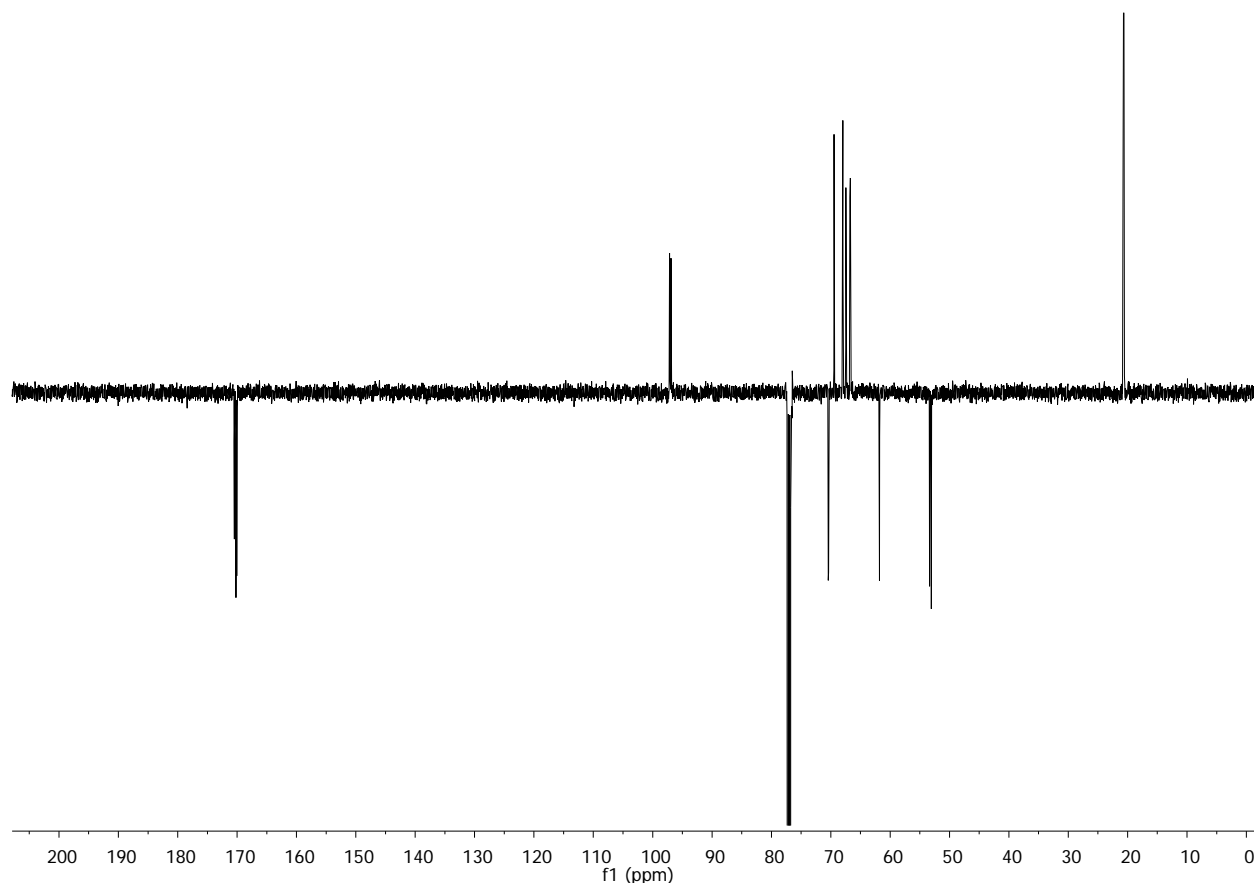

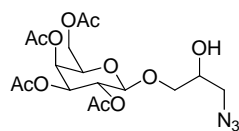

**3β**

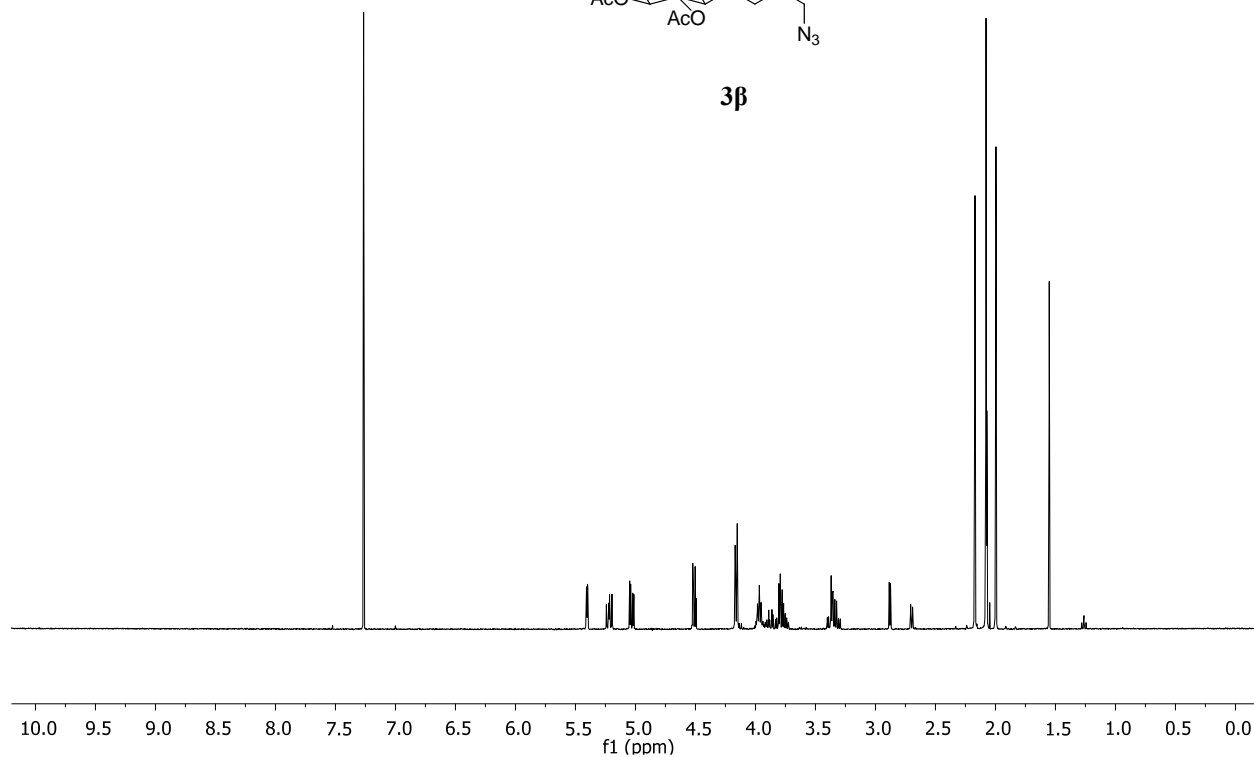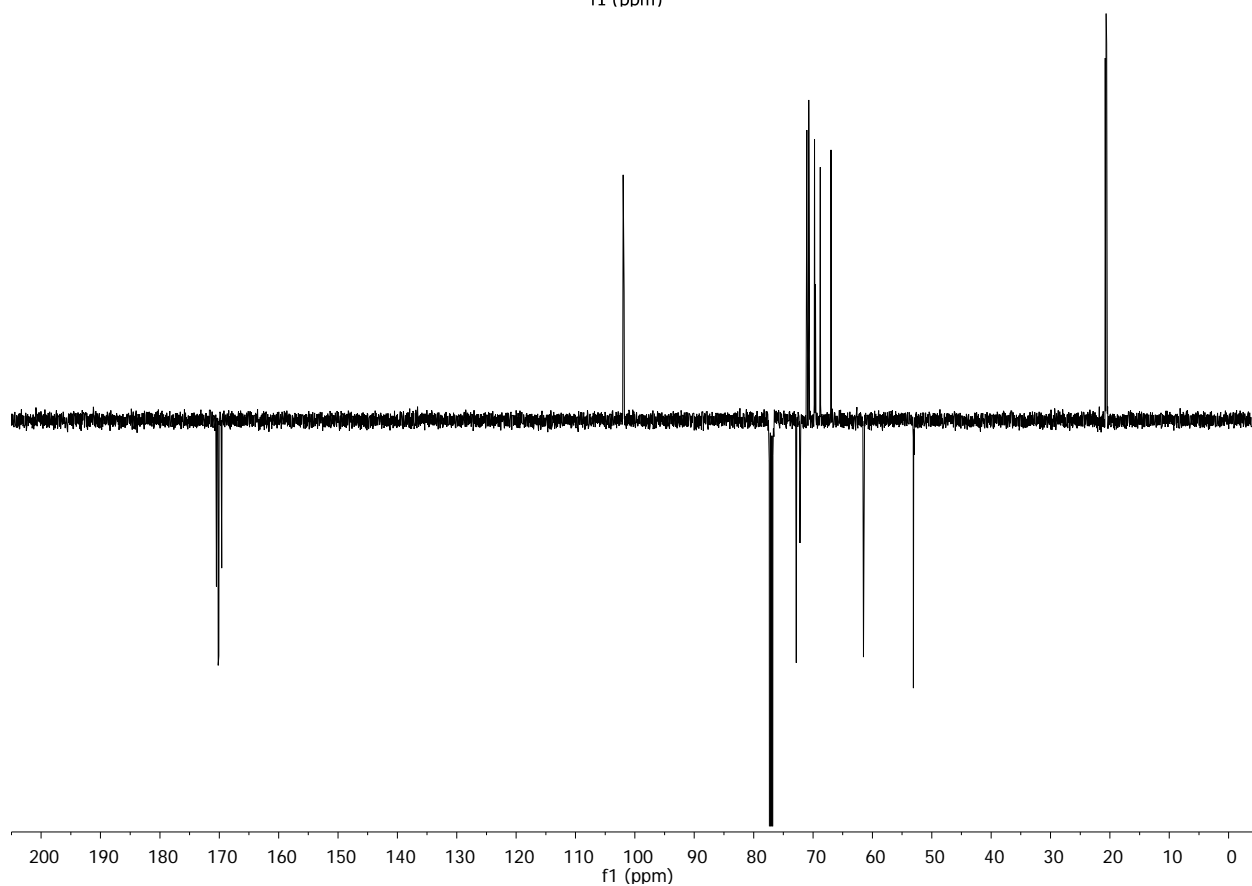

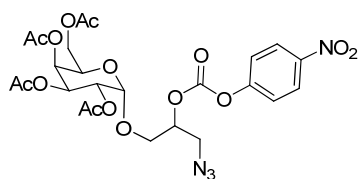

**4a**

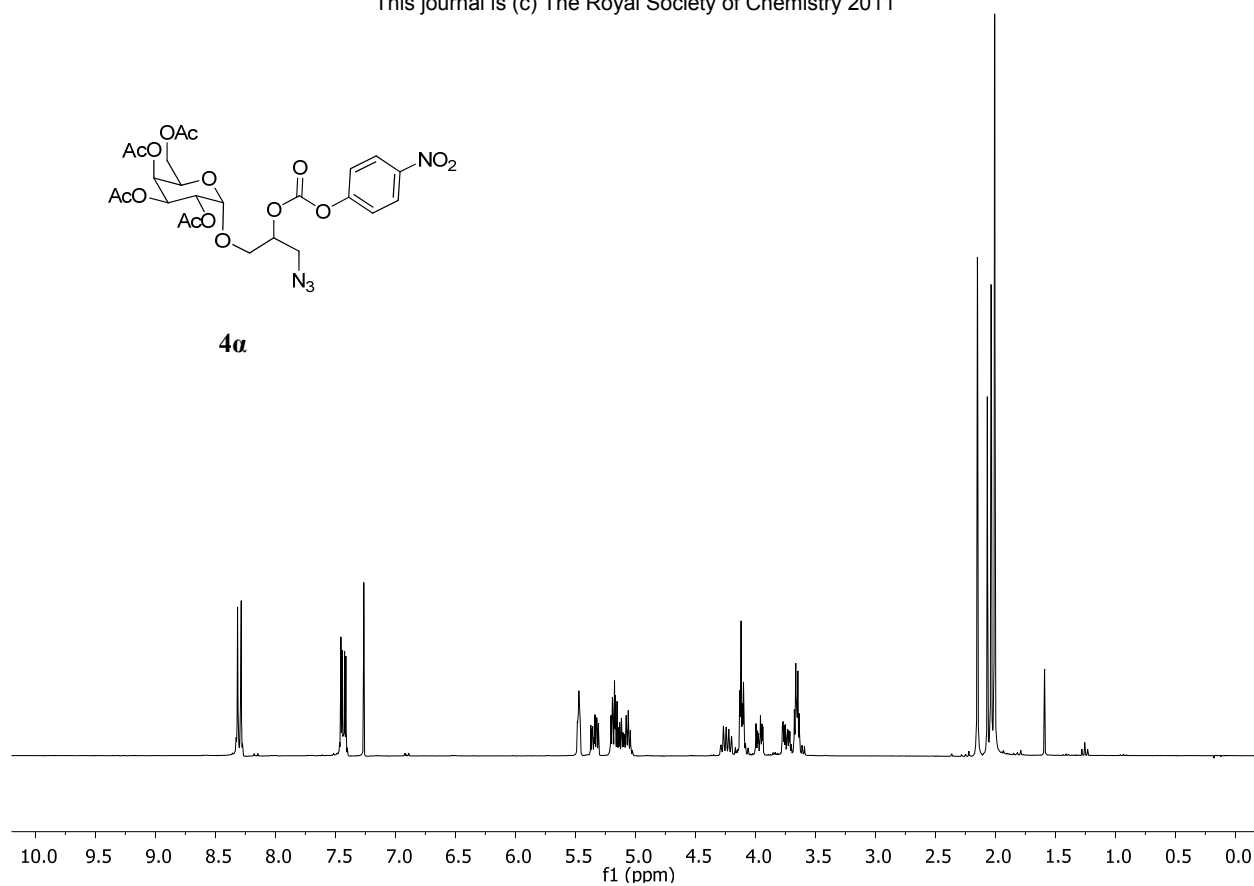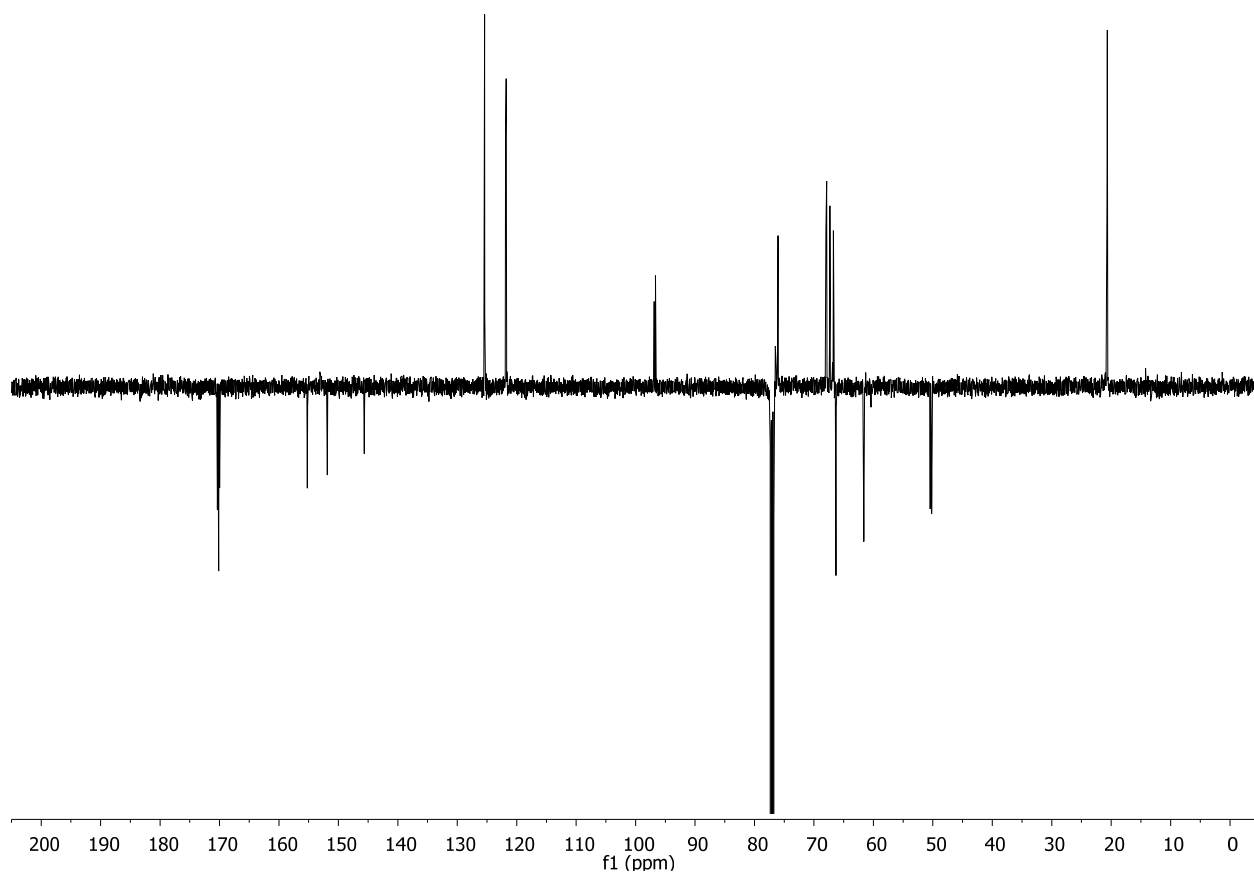

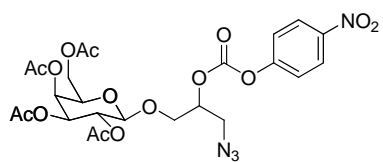

**4β**

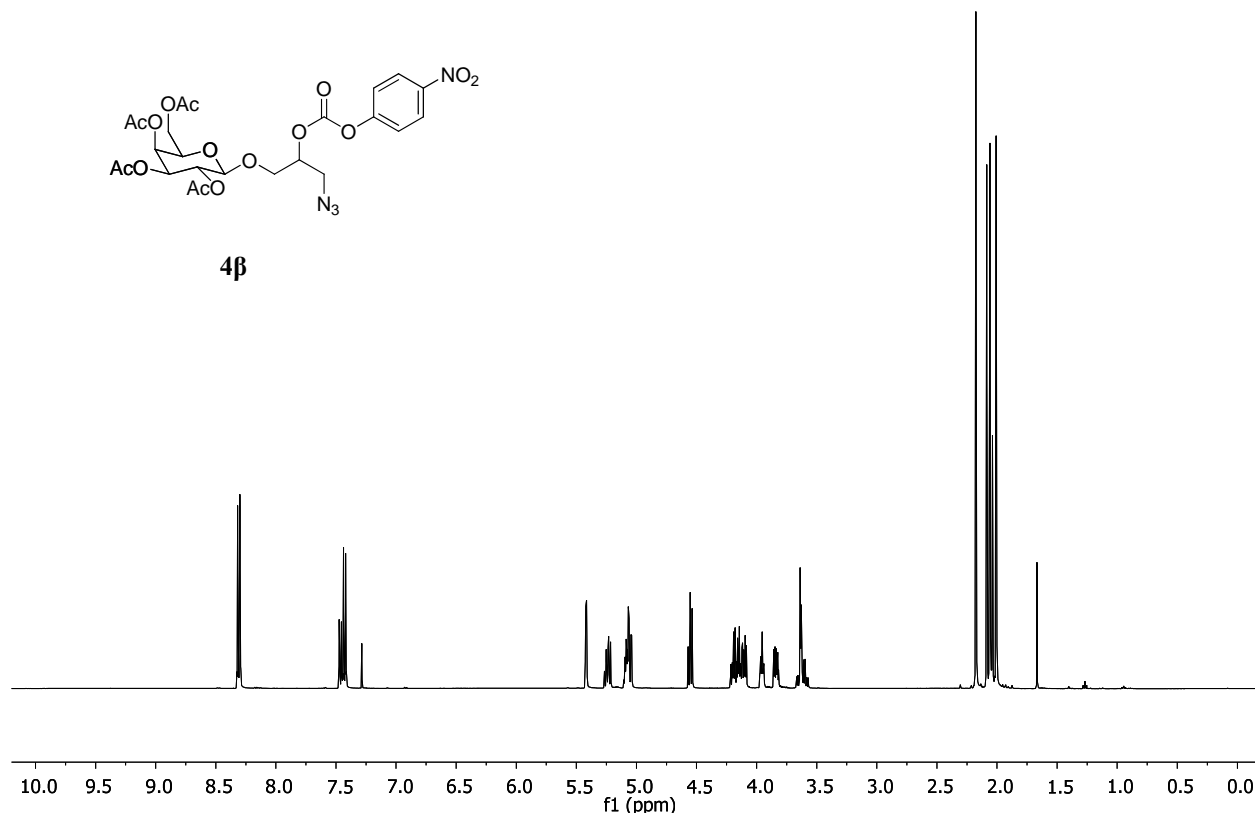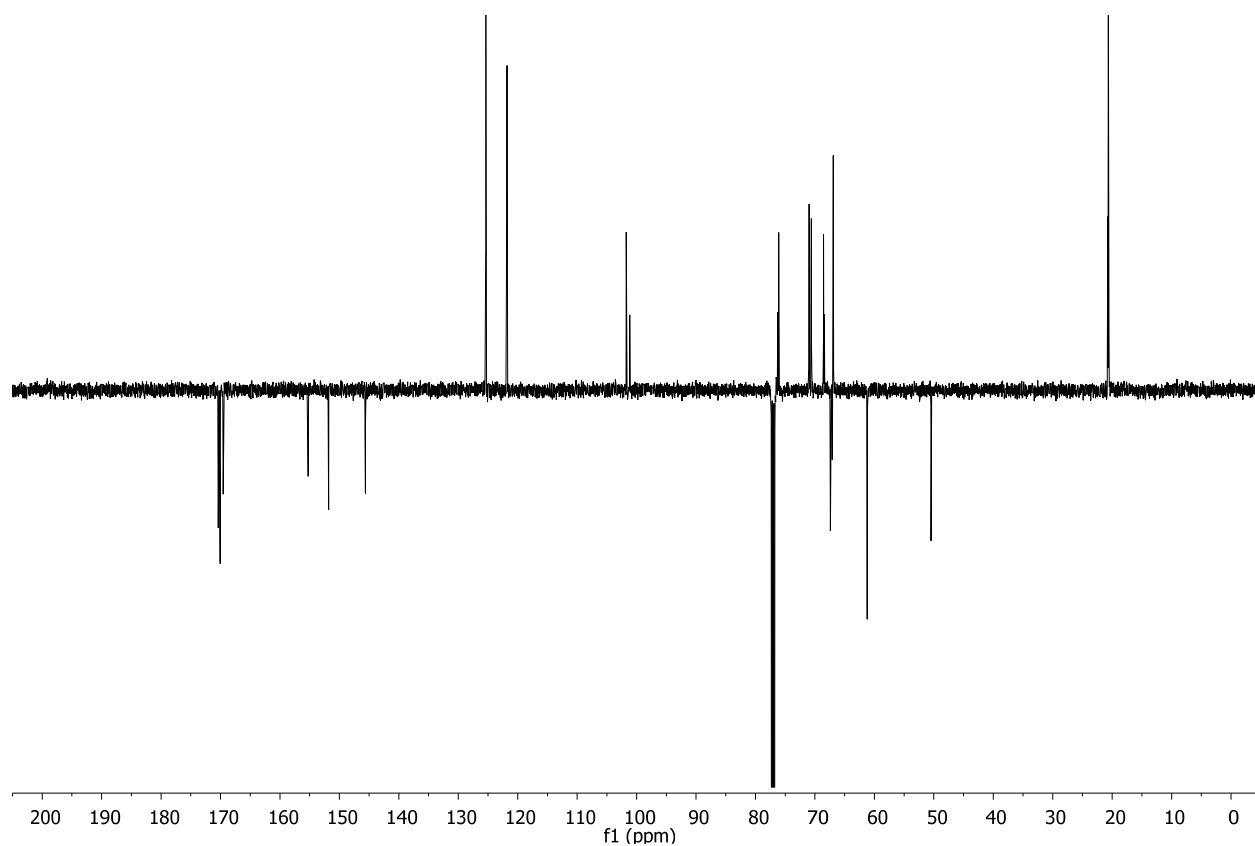

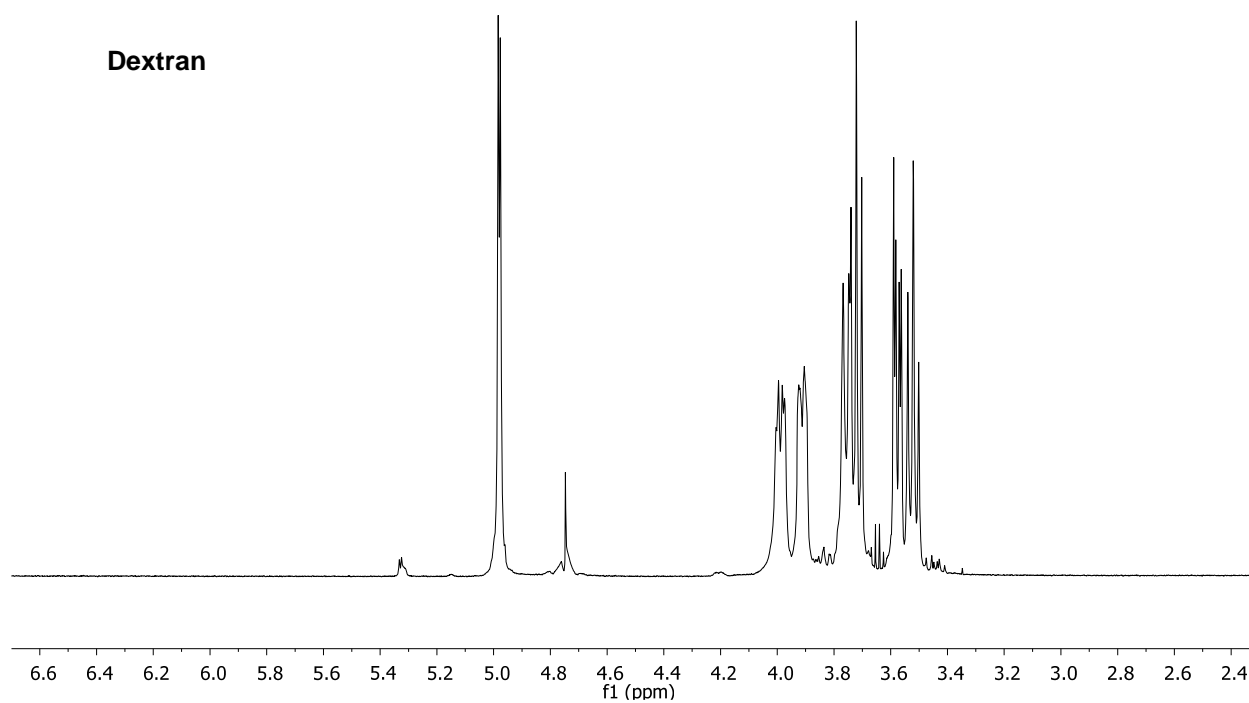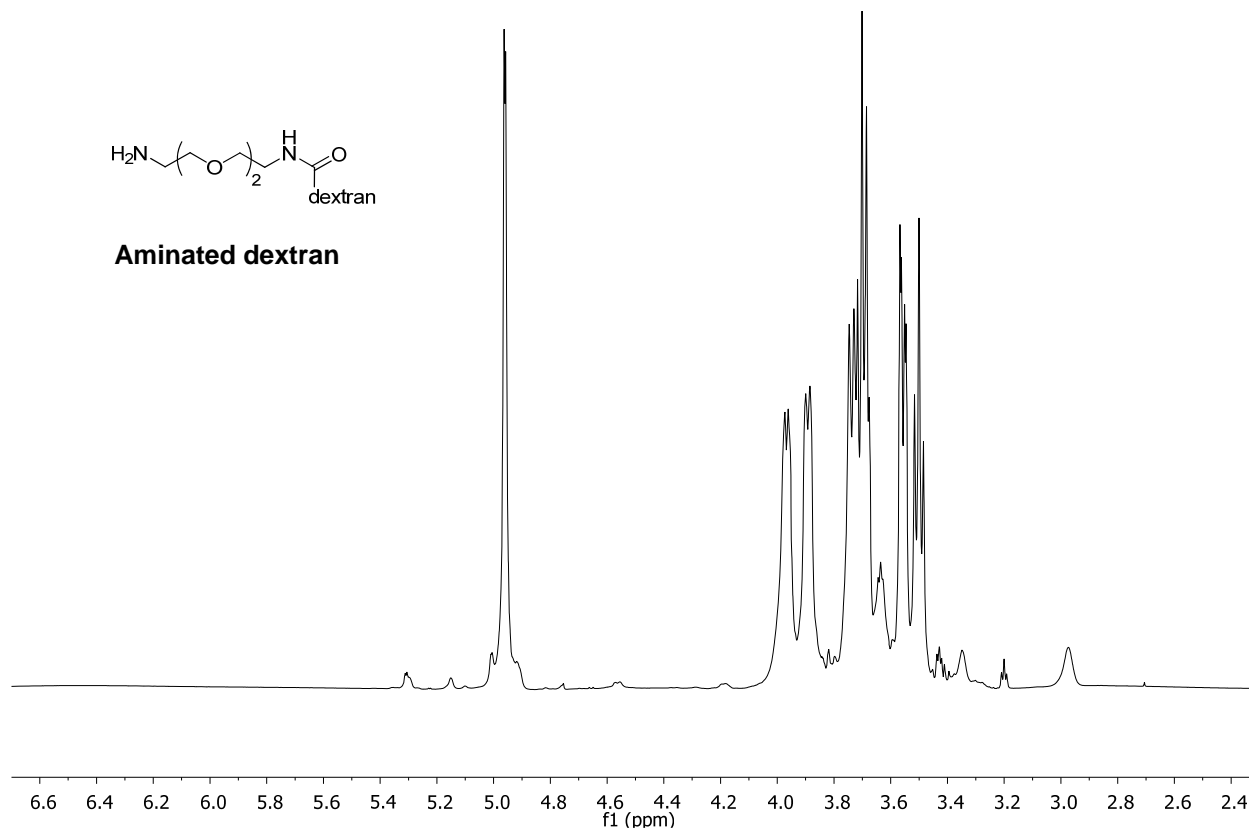

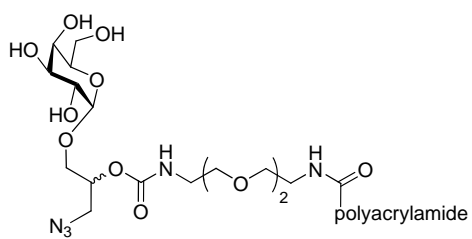

**5a**

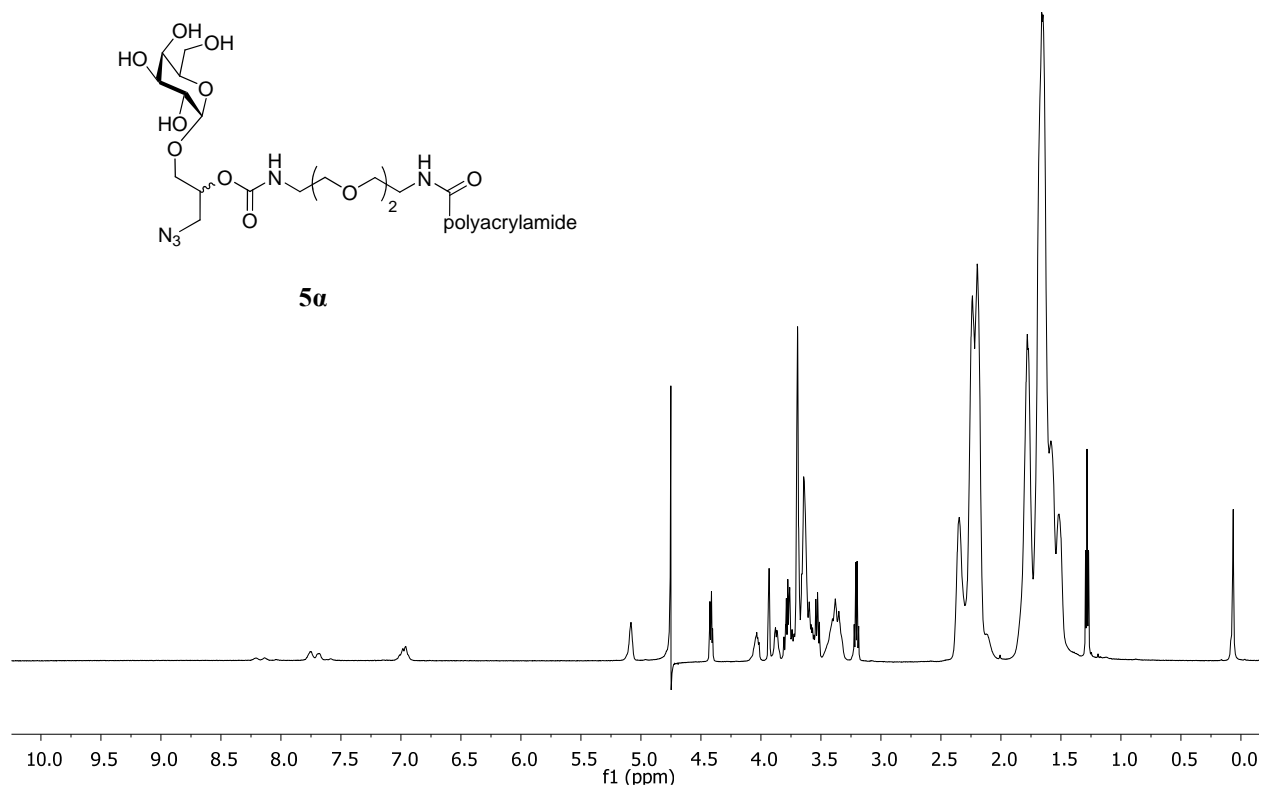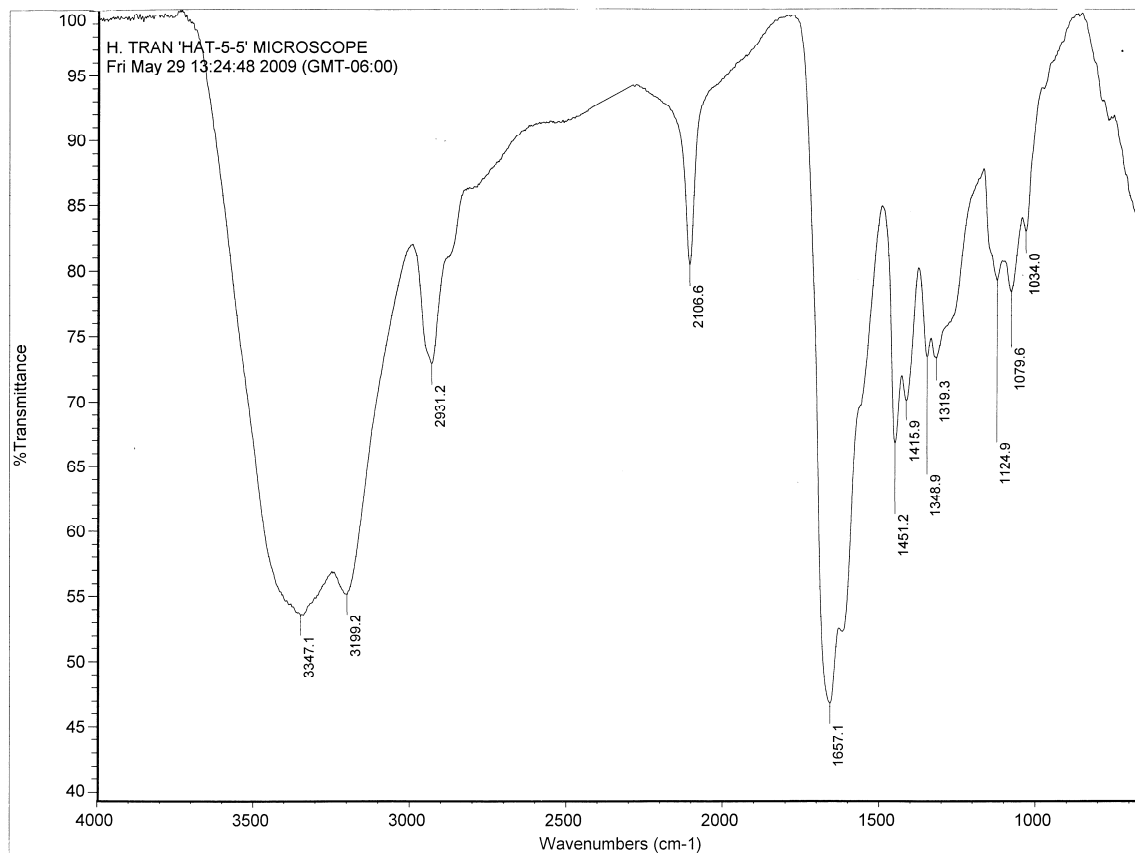

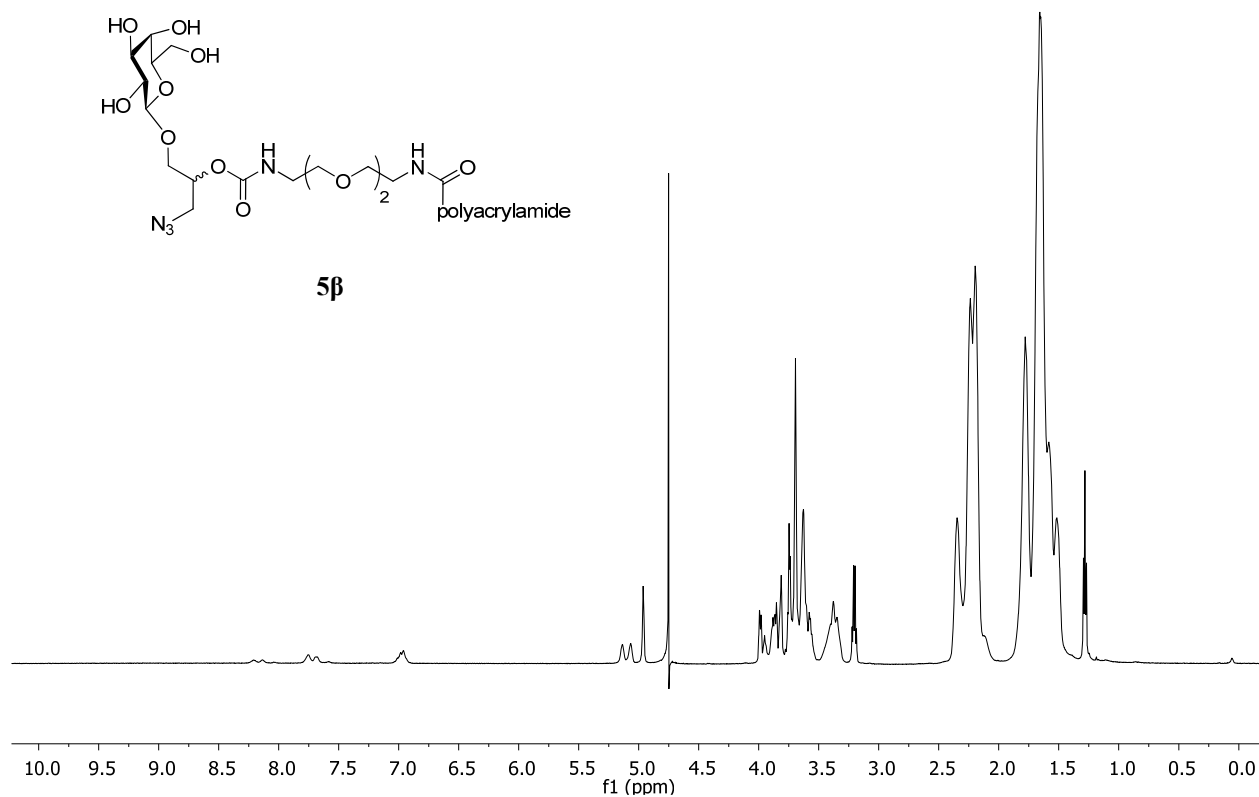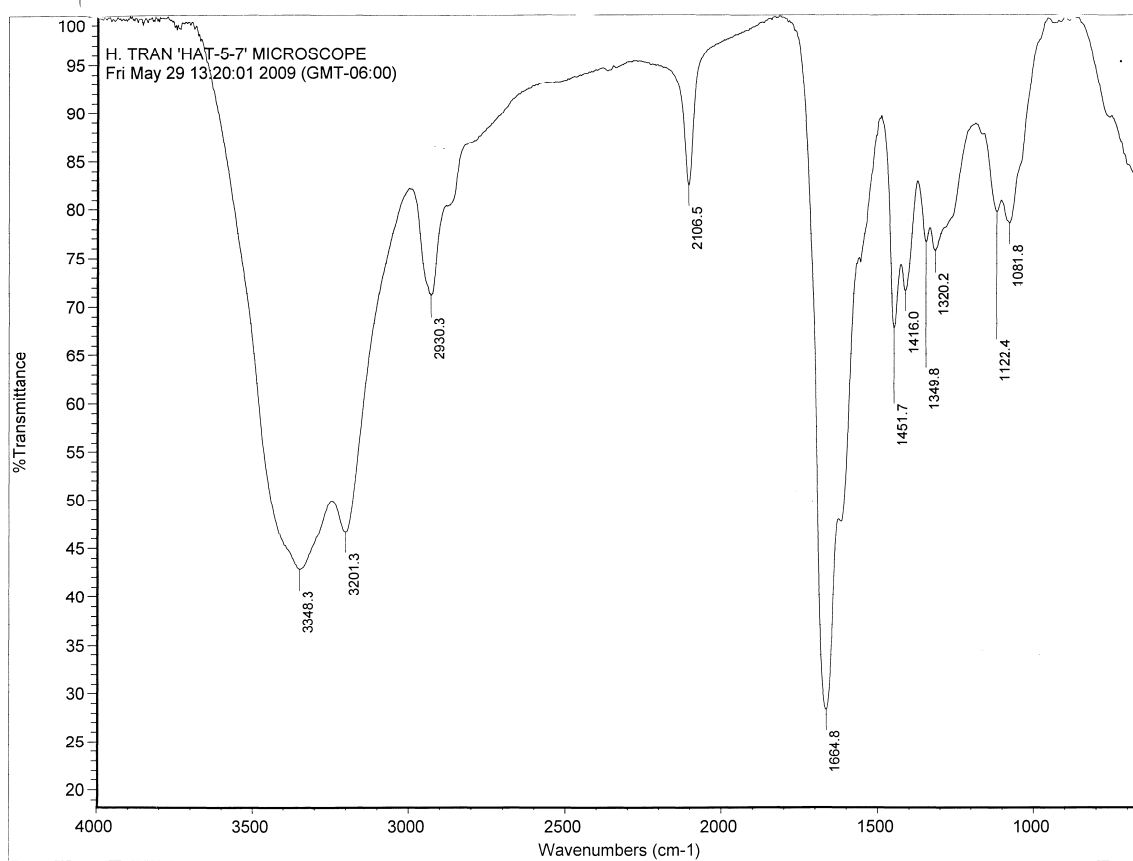



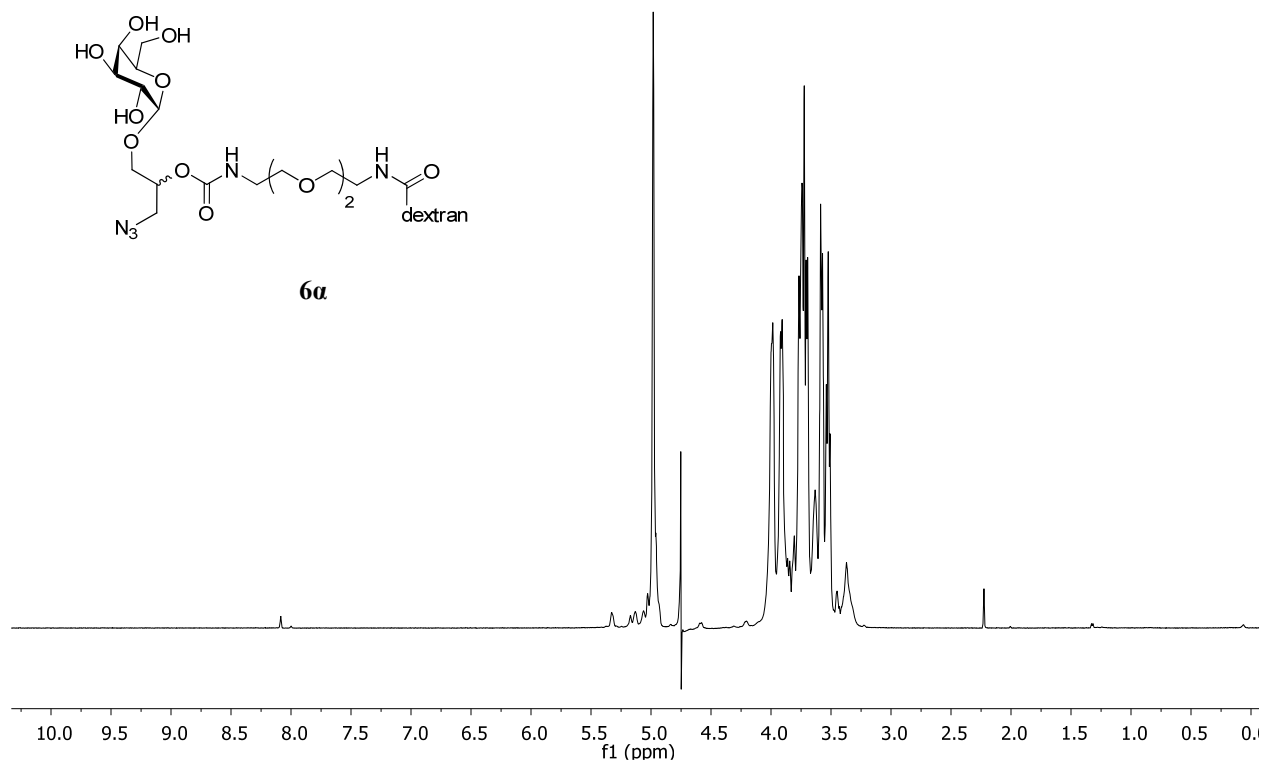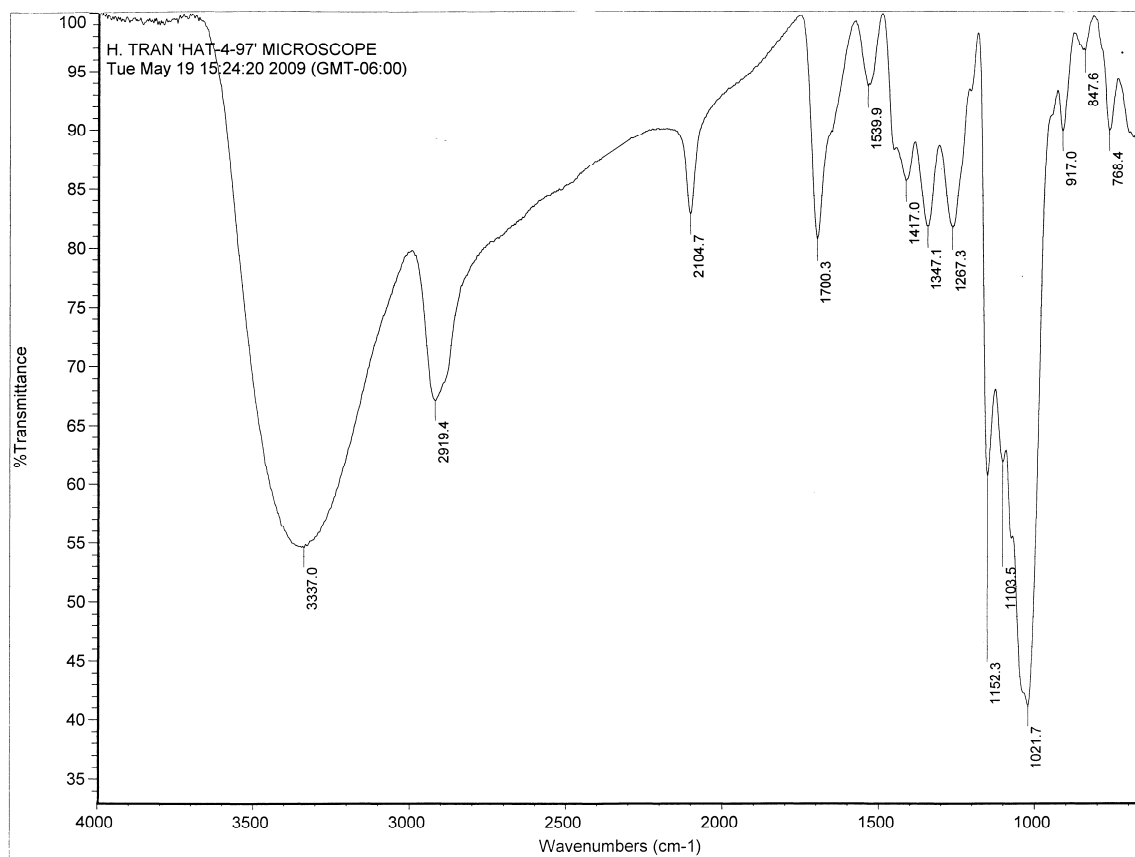

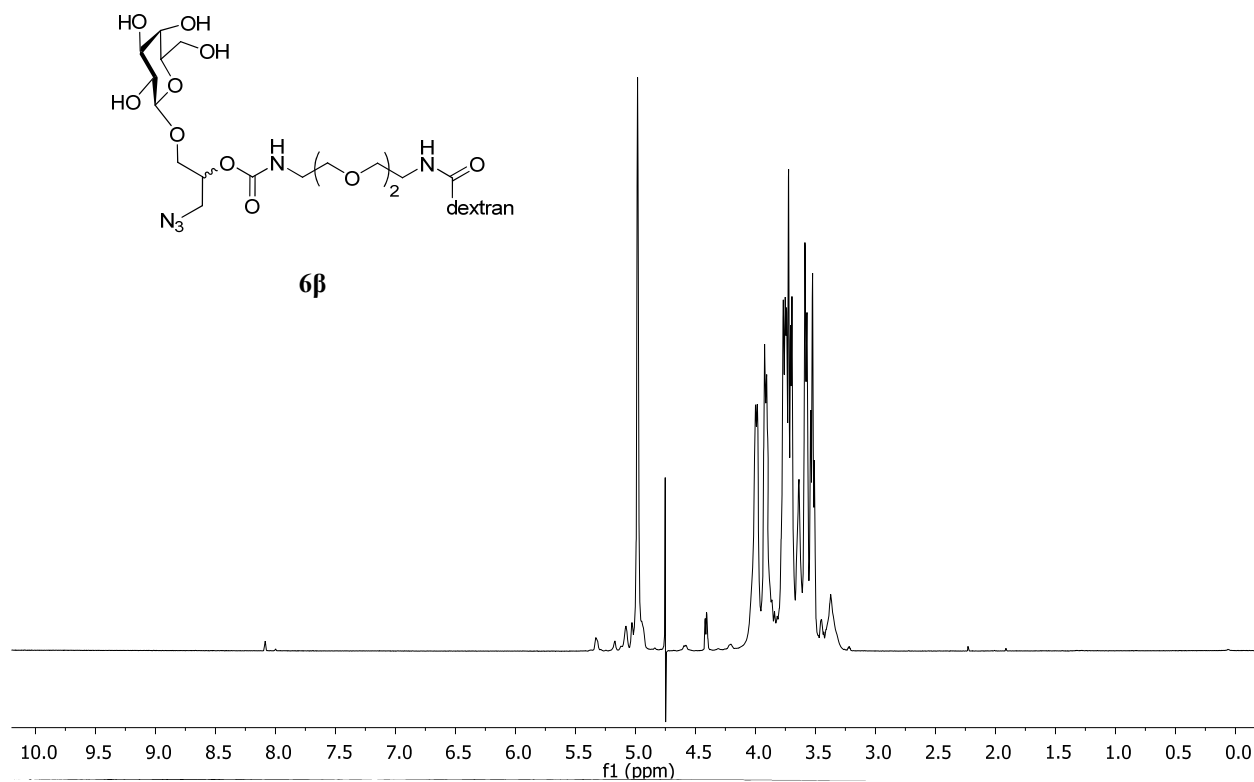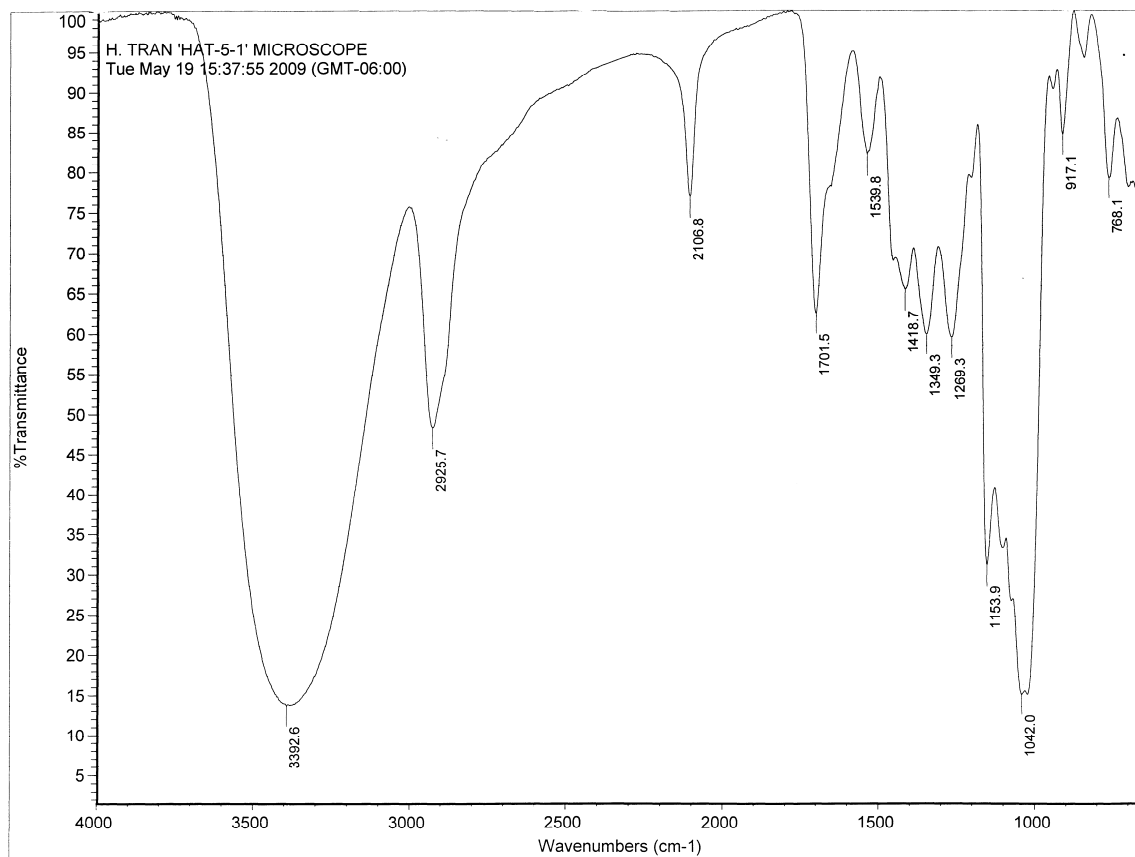

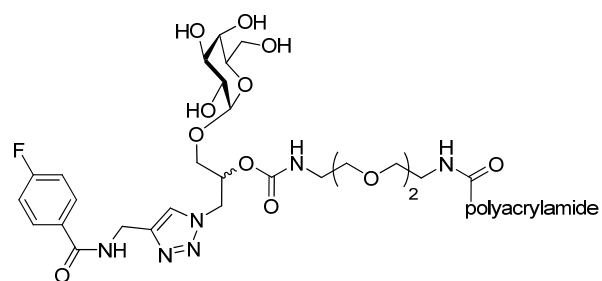

**5a27**

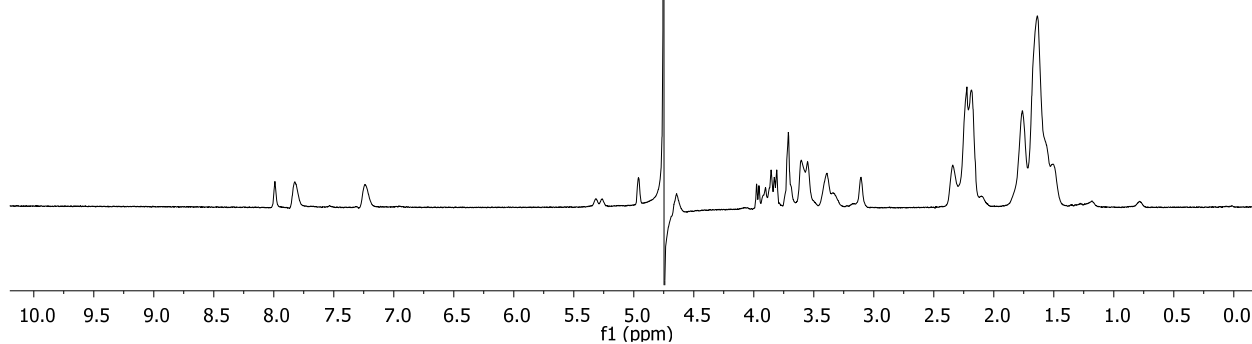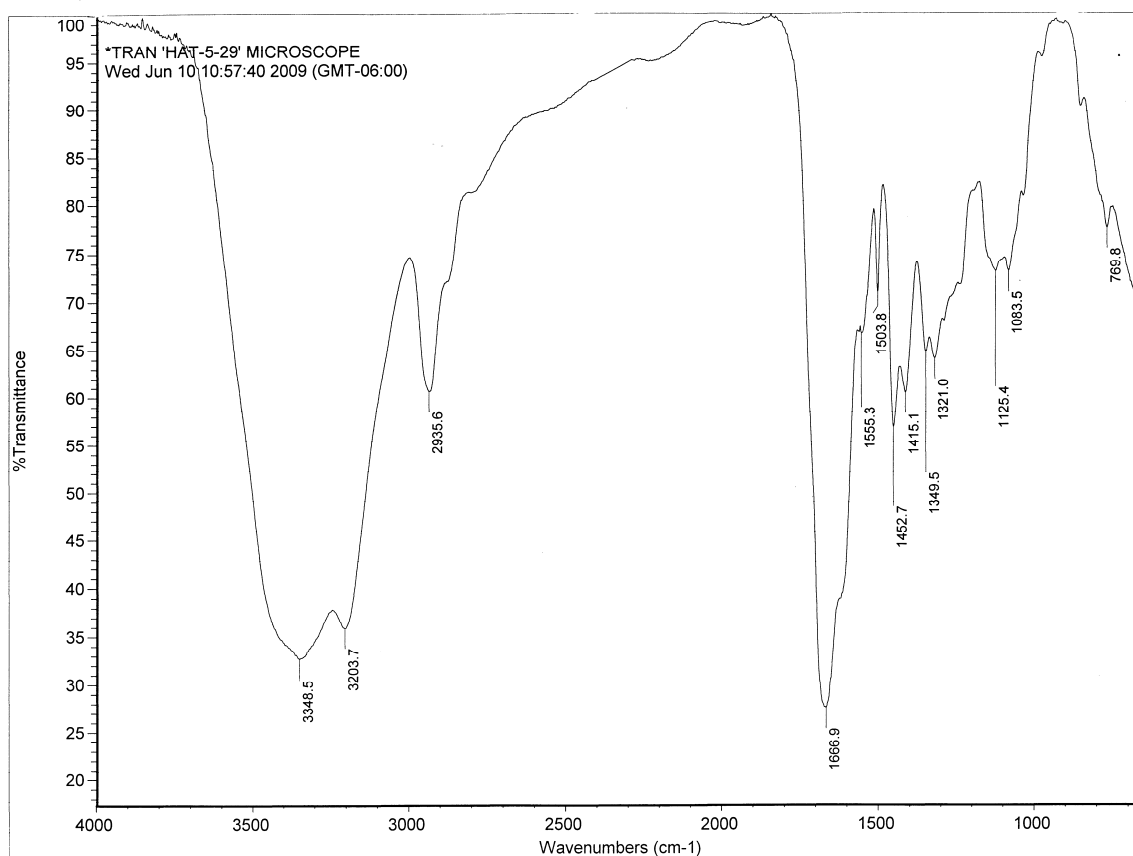

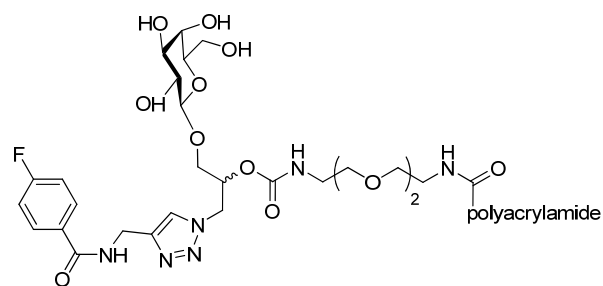

5β27

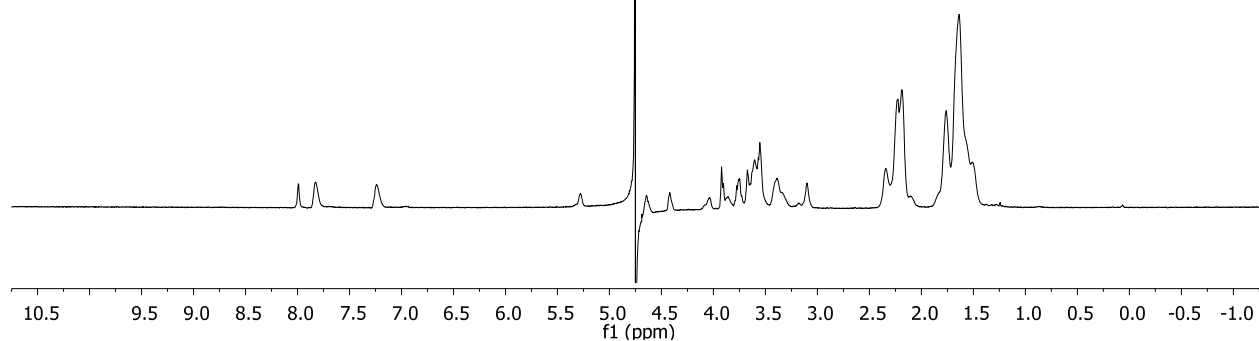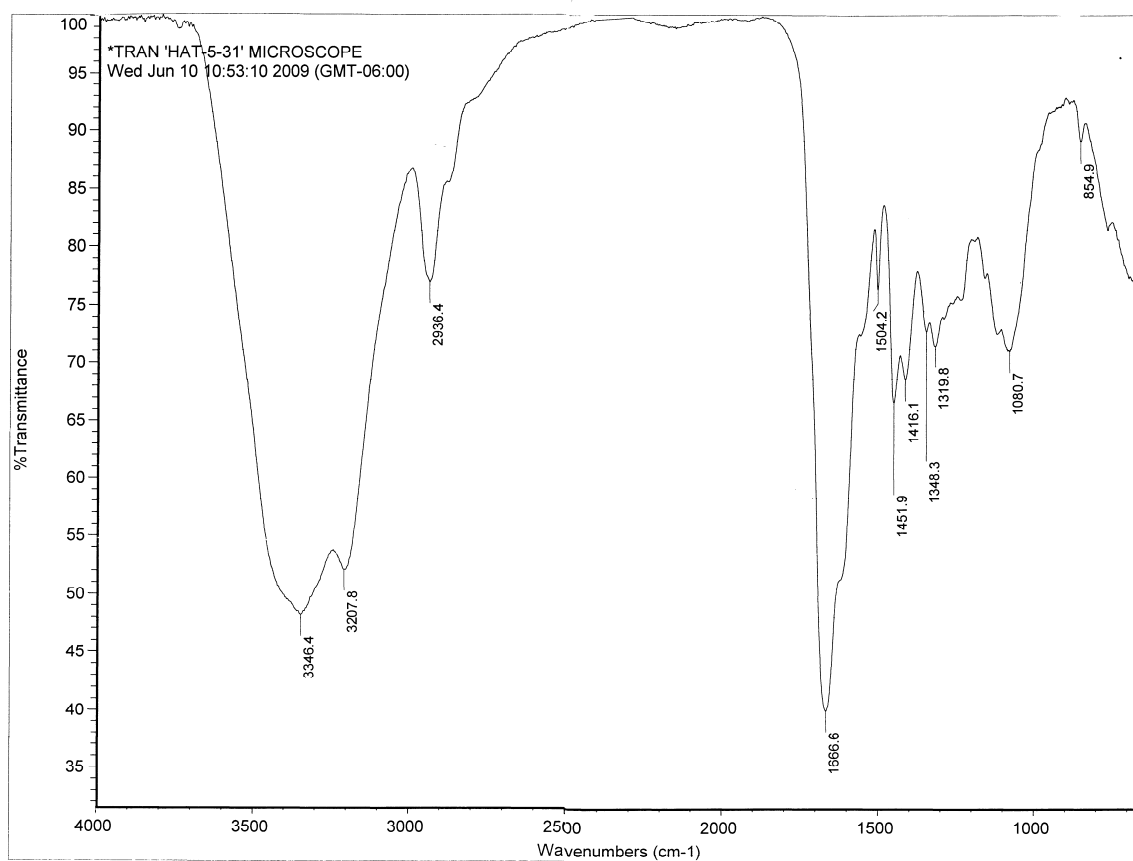

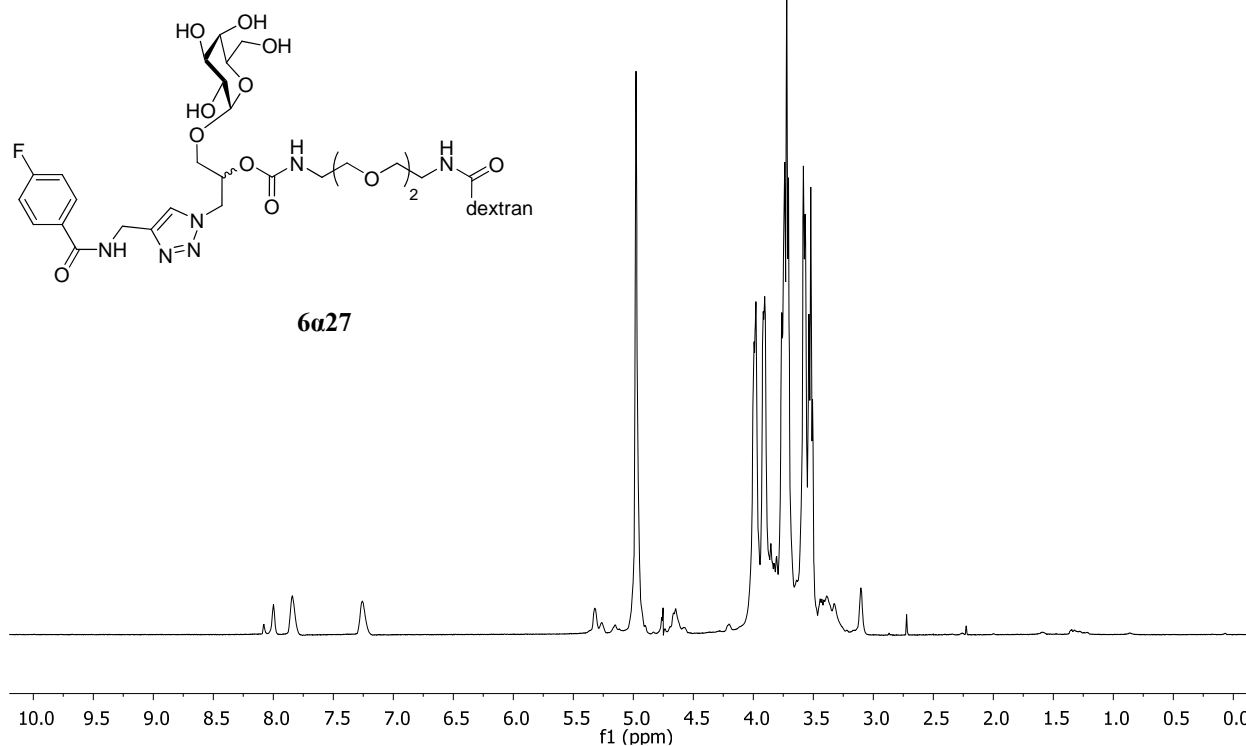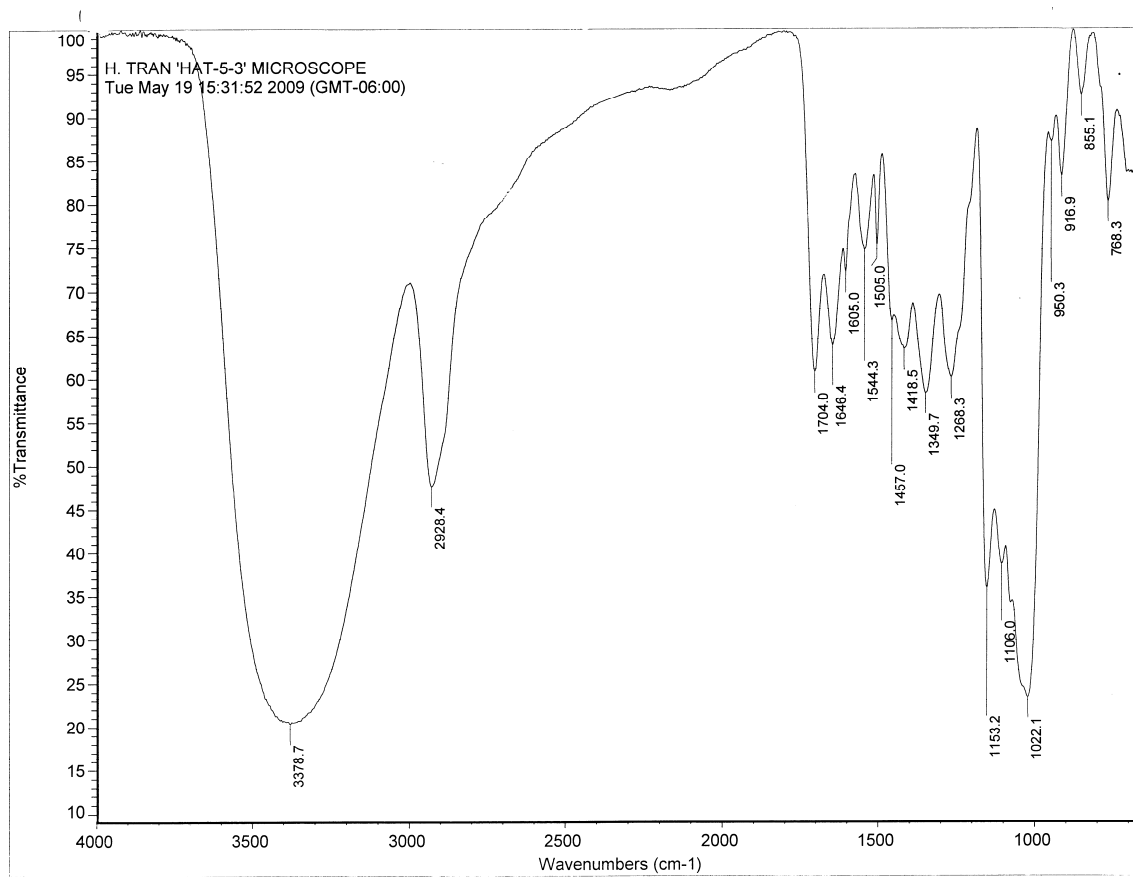

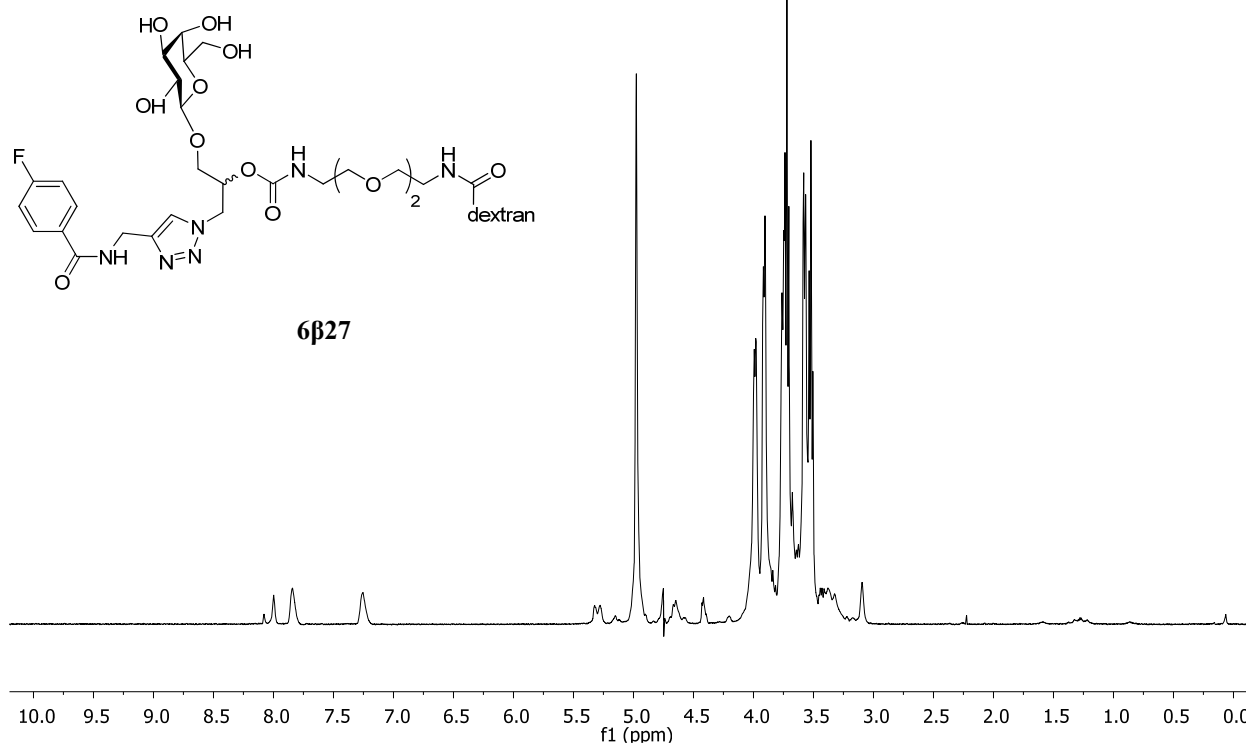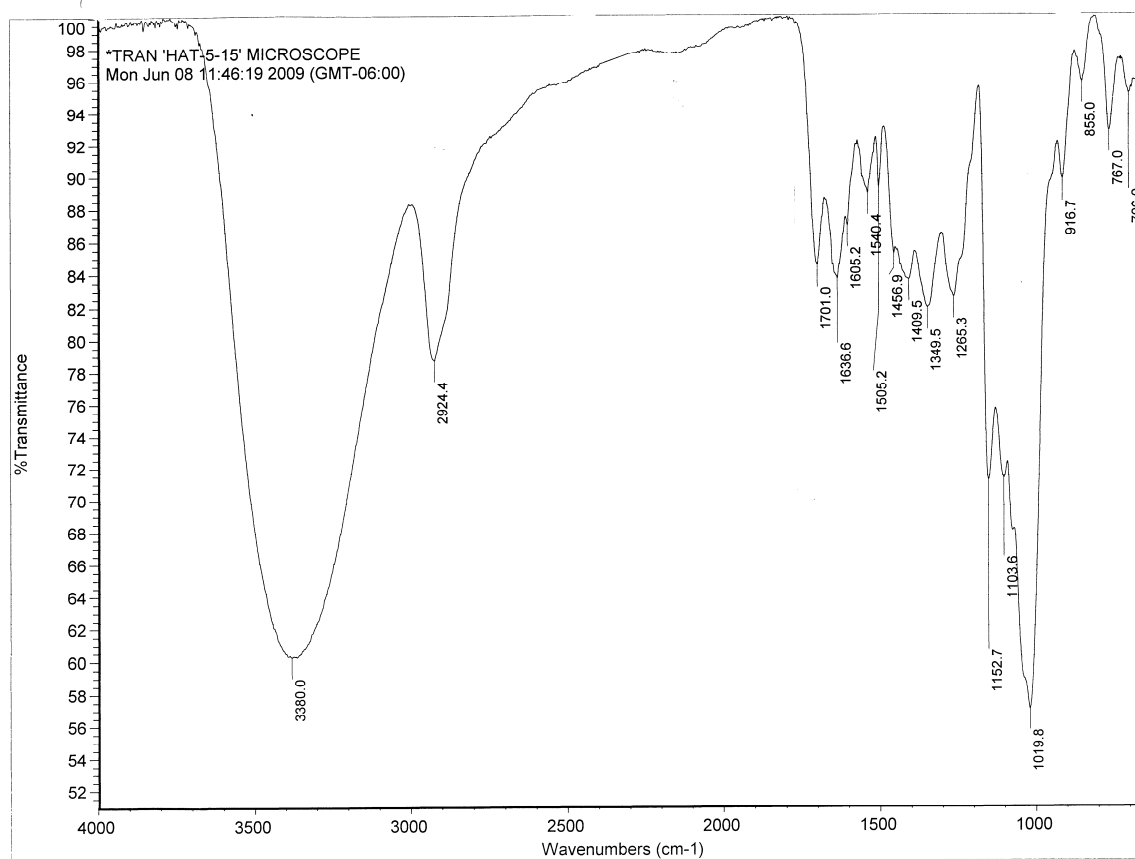

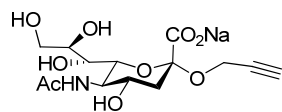

**7.1**

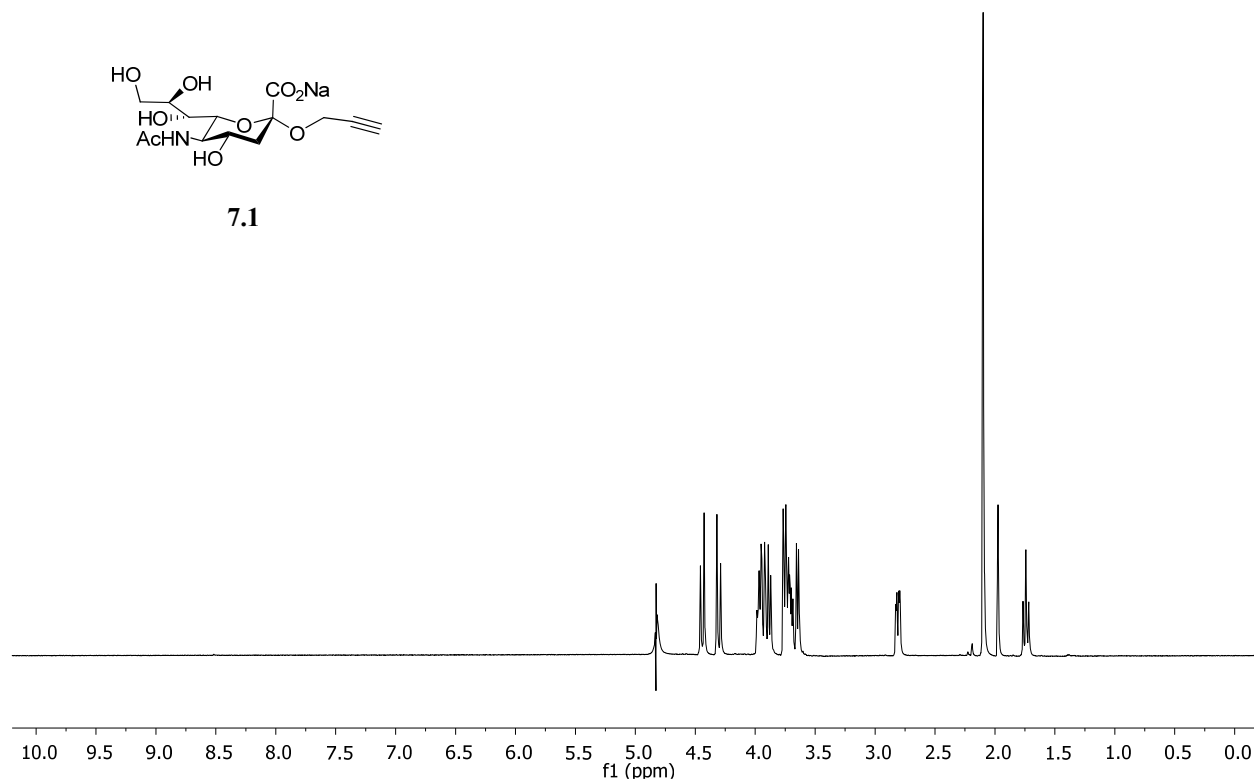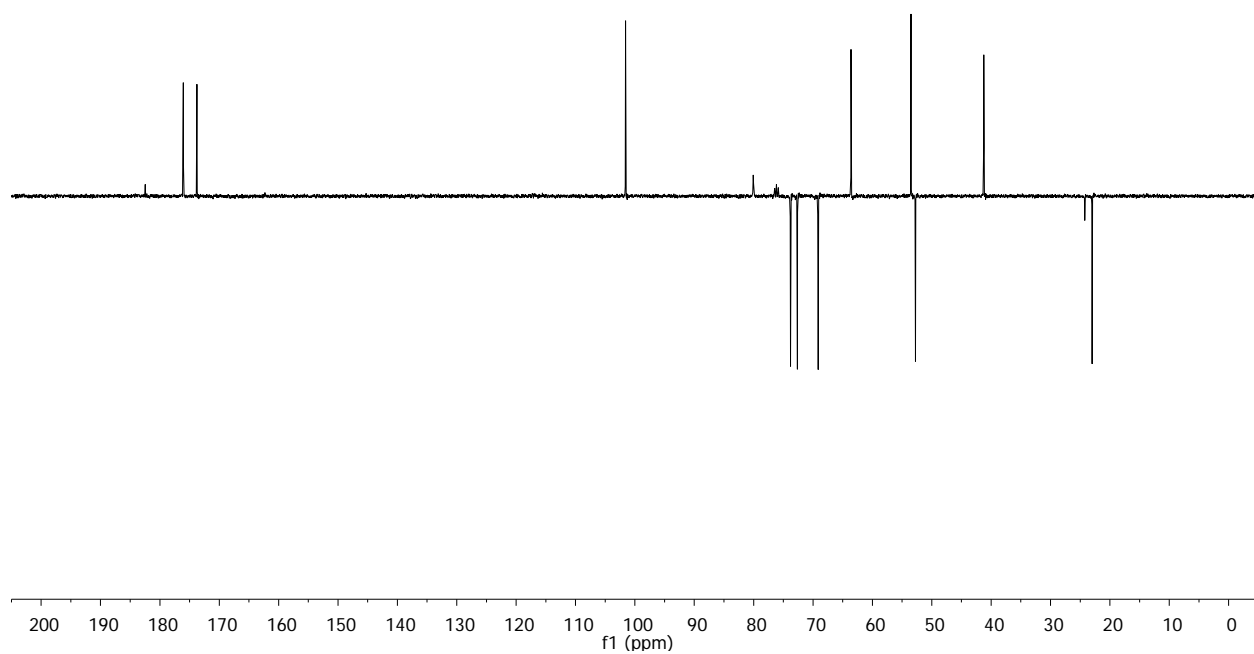

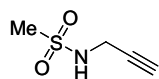

7.2

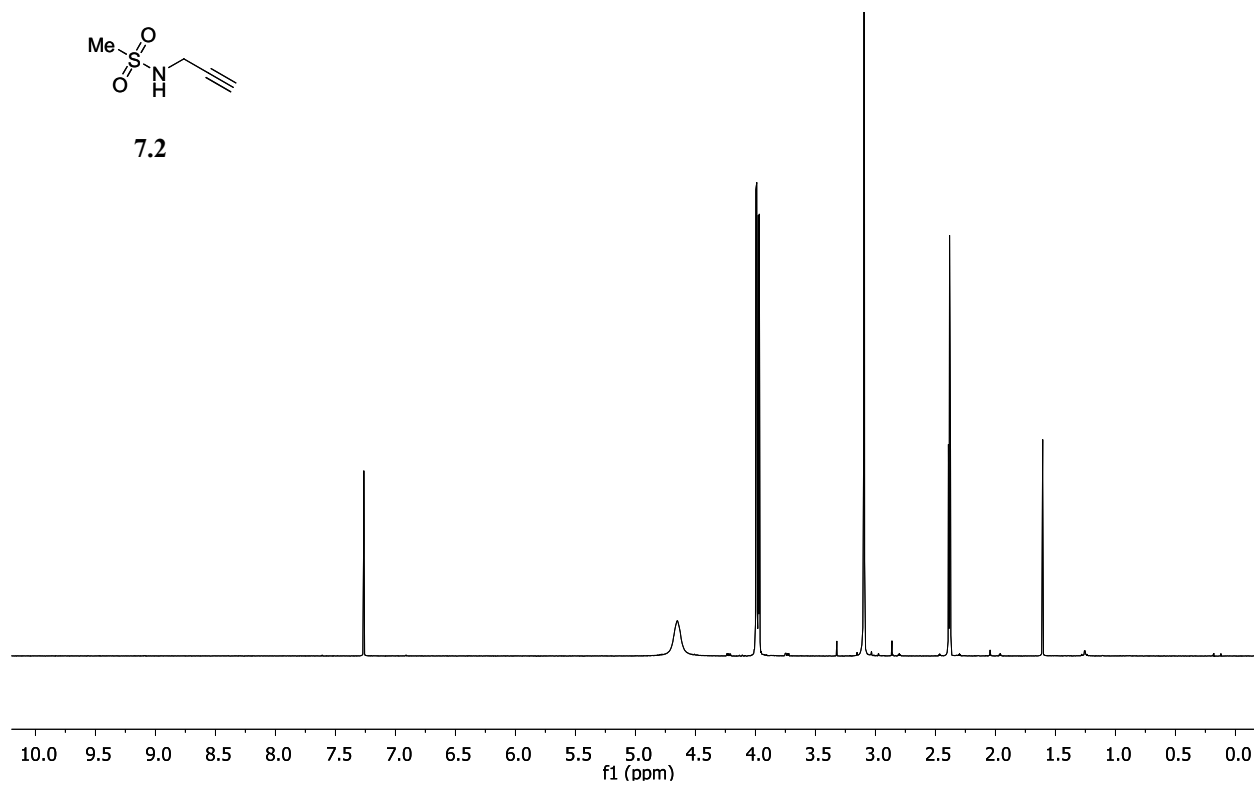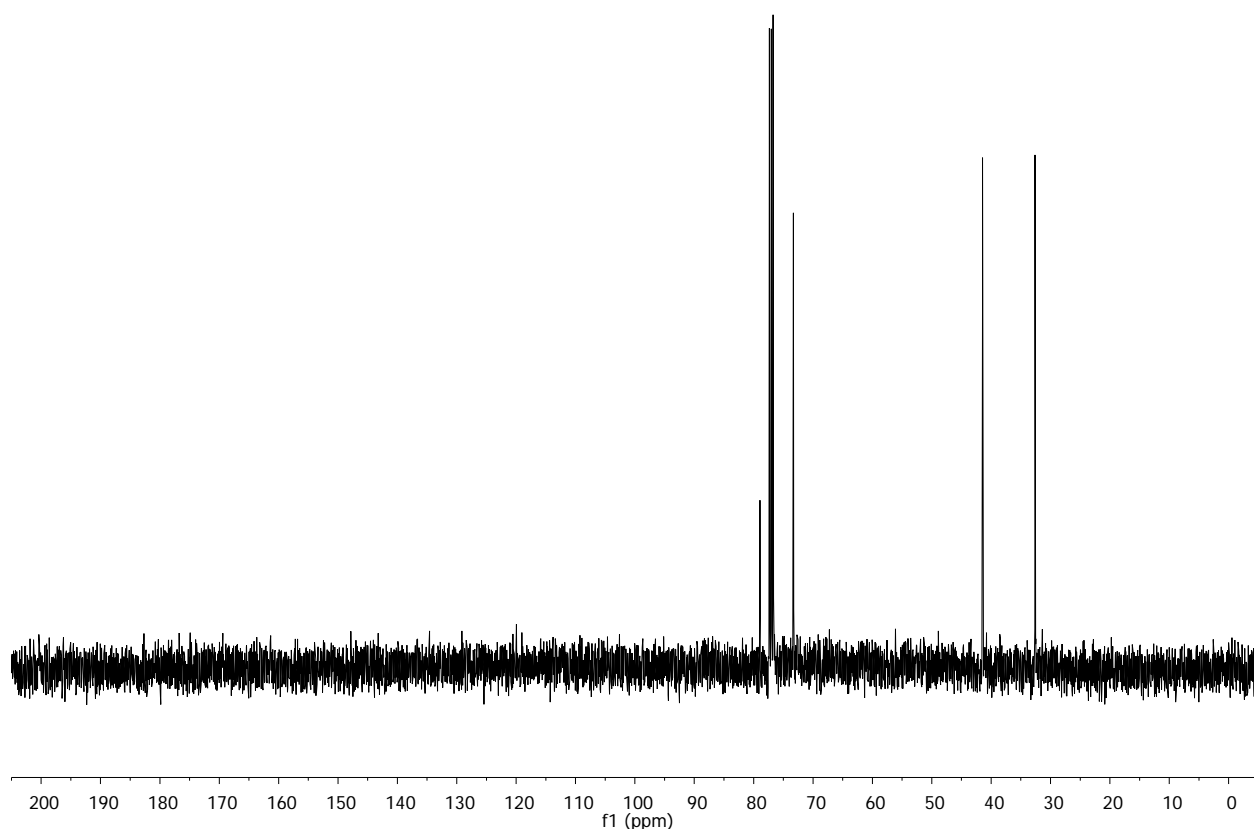



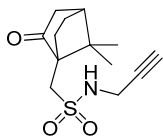

7.3

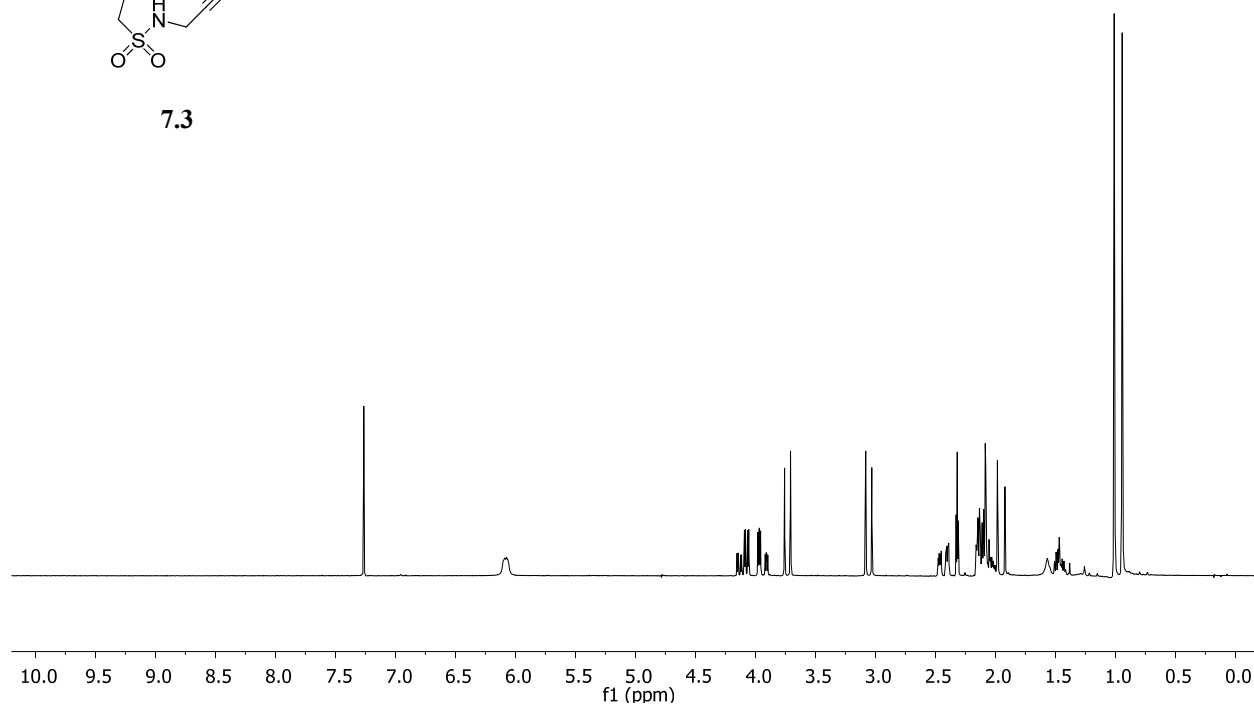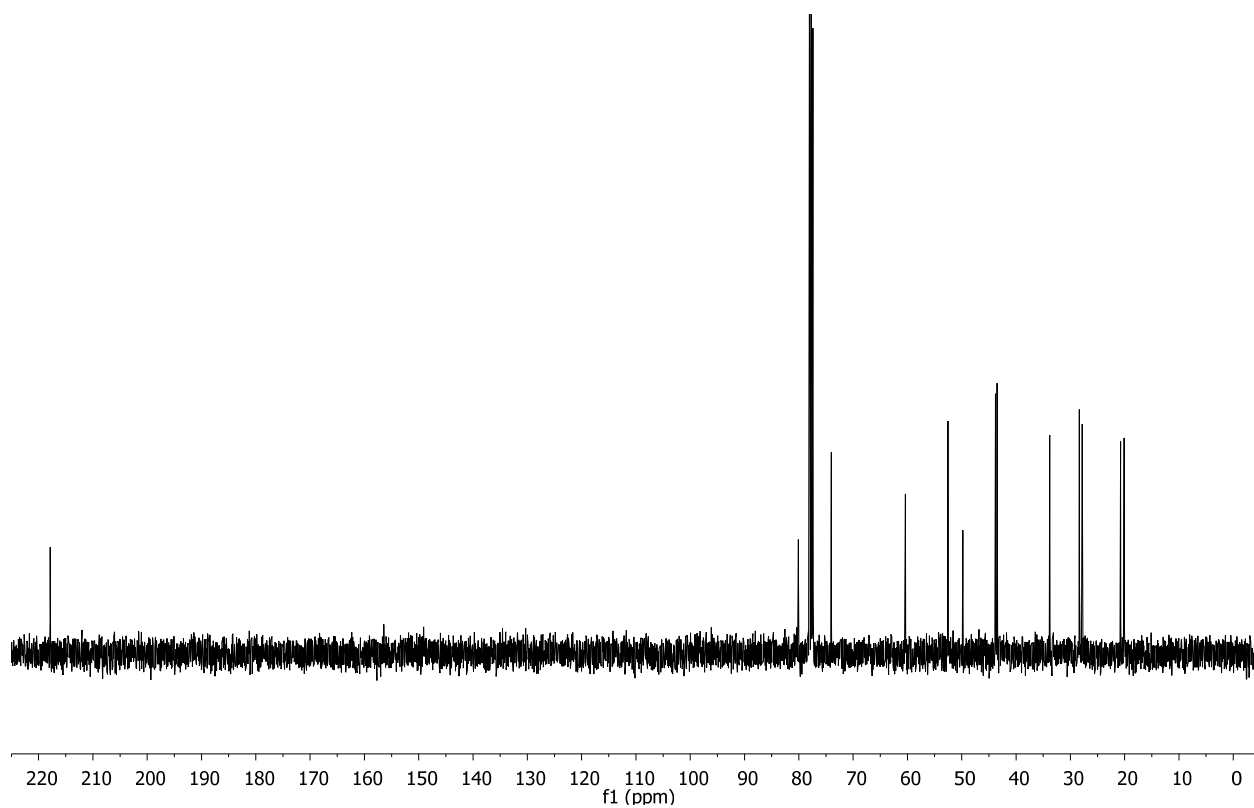

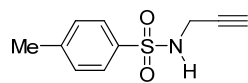

7.4

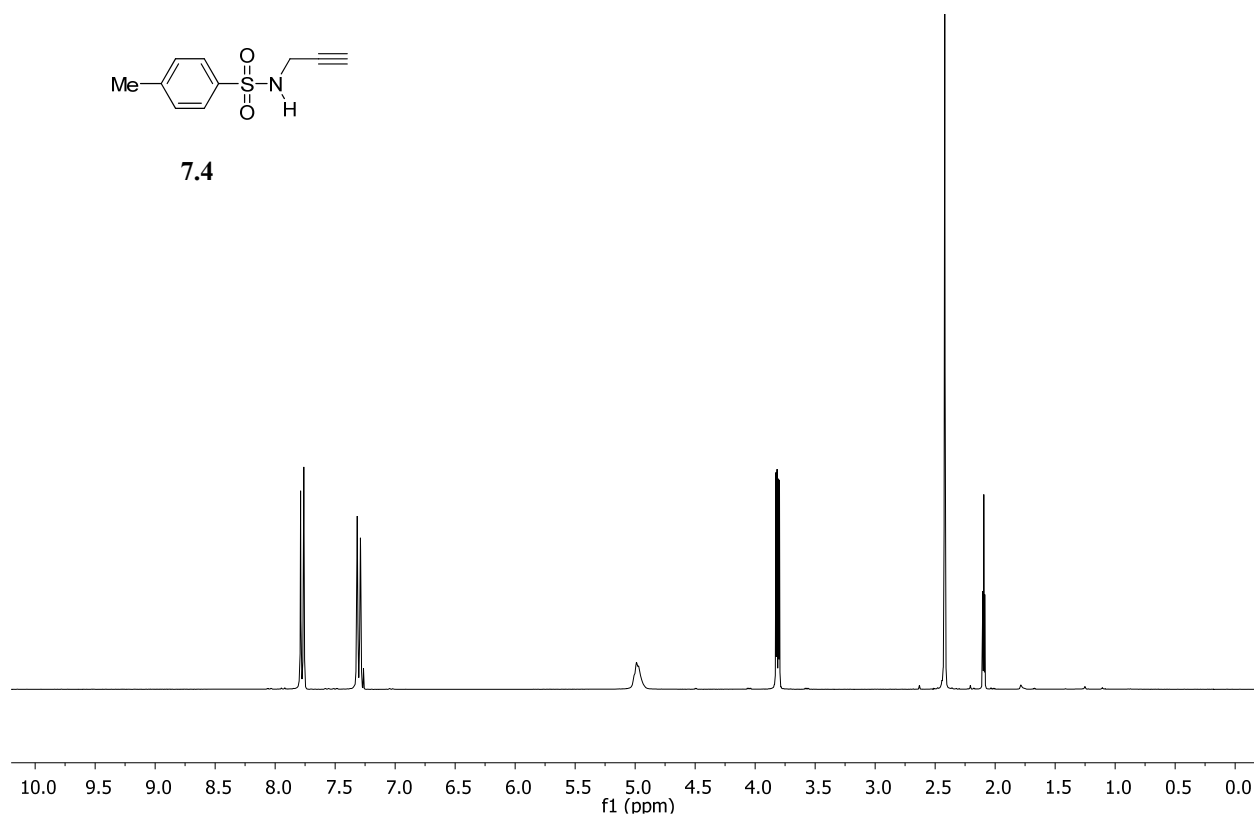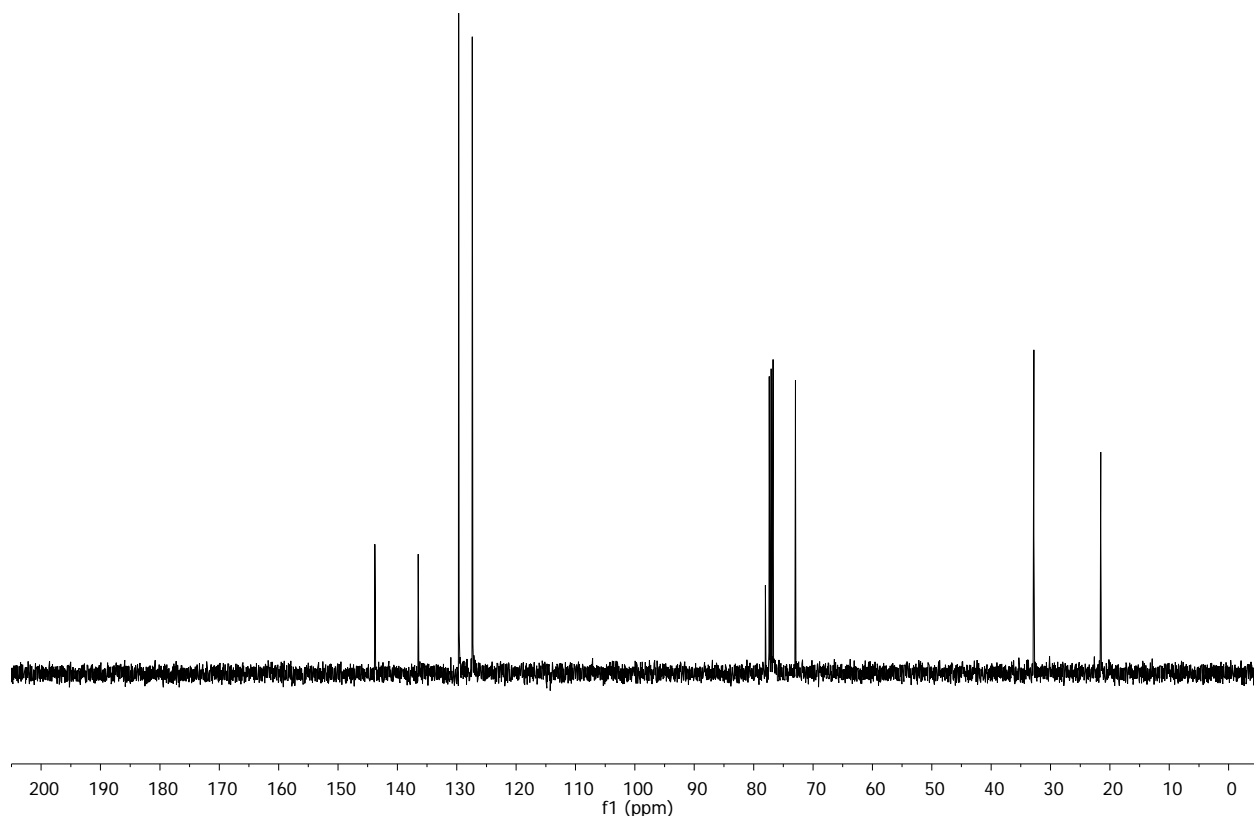

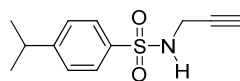

**7.5**

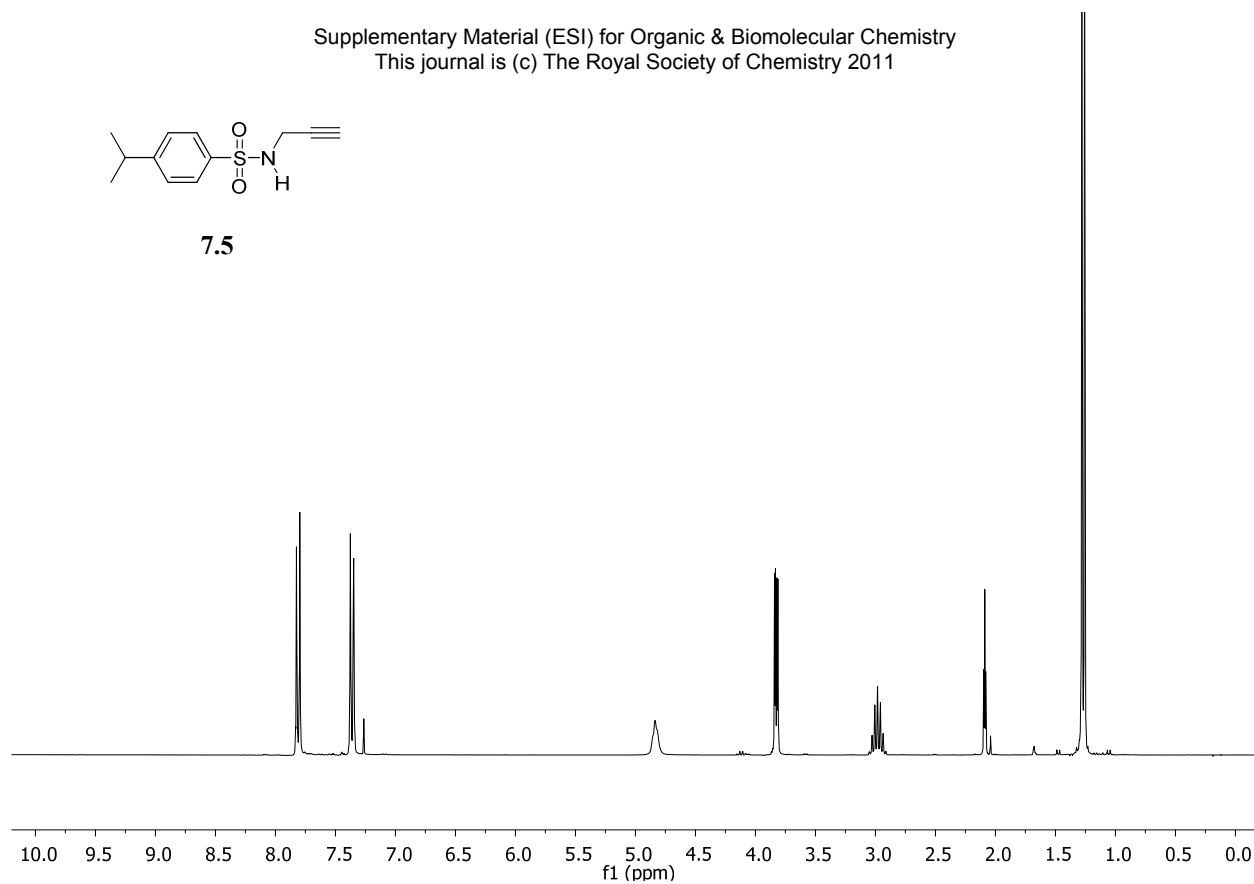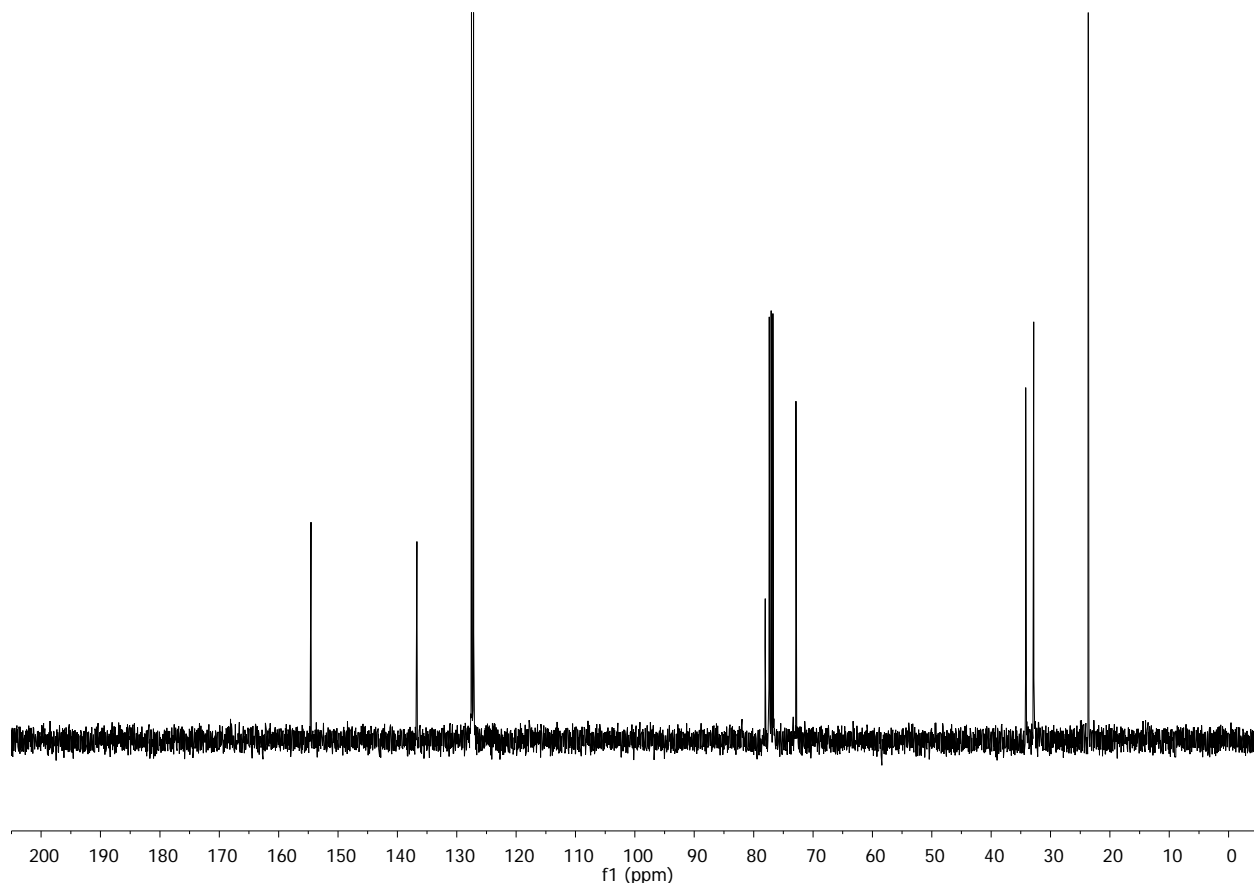

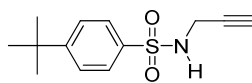

7.6

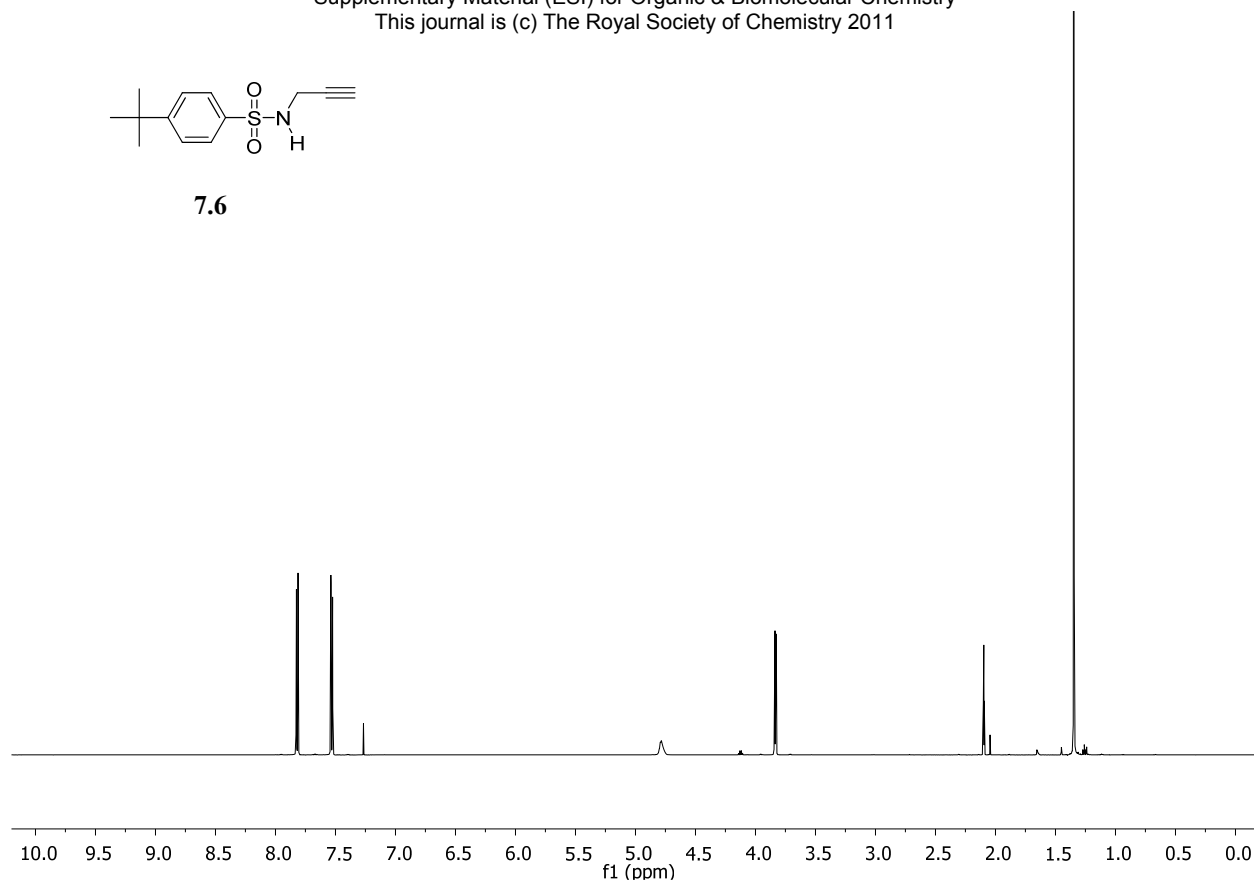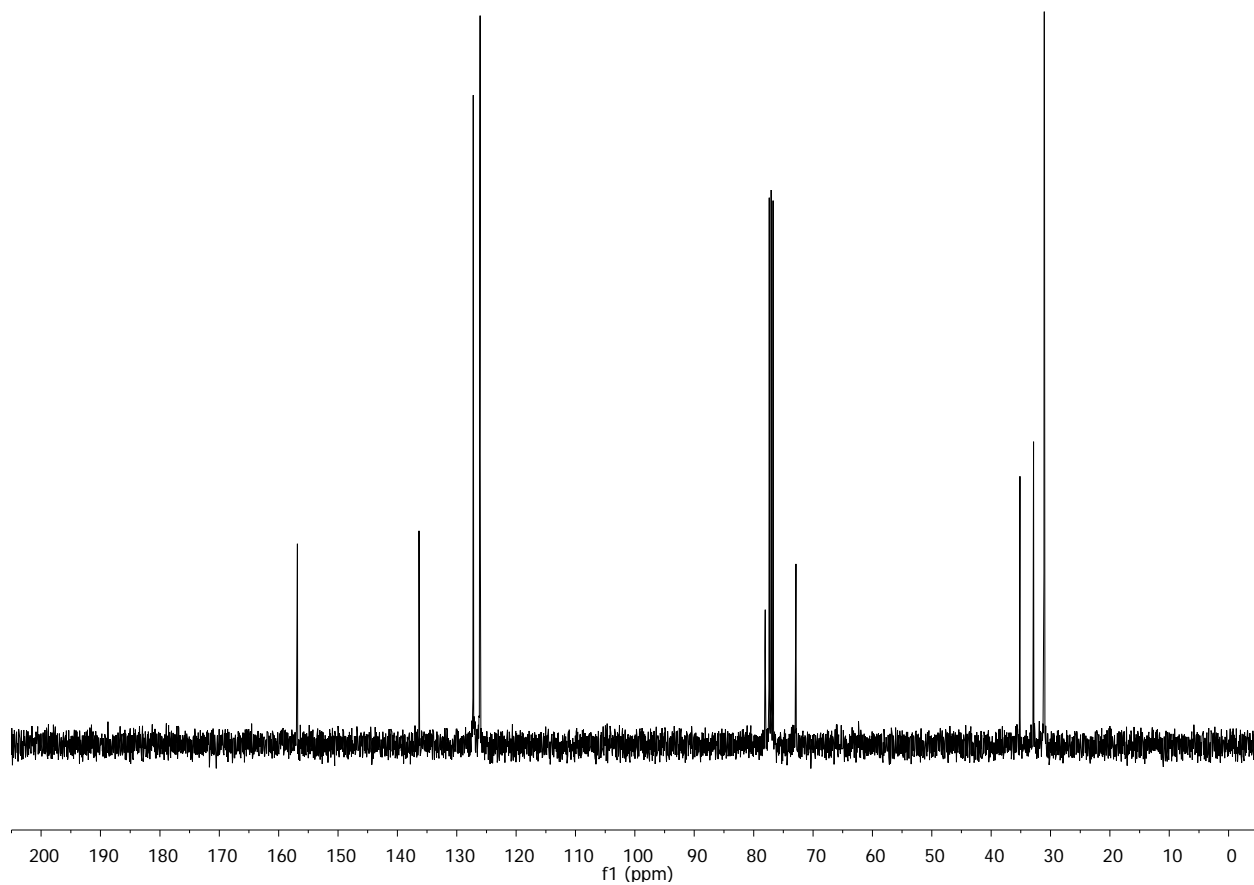

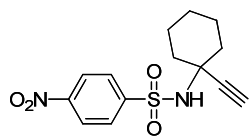

7.8

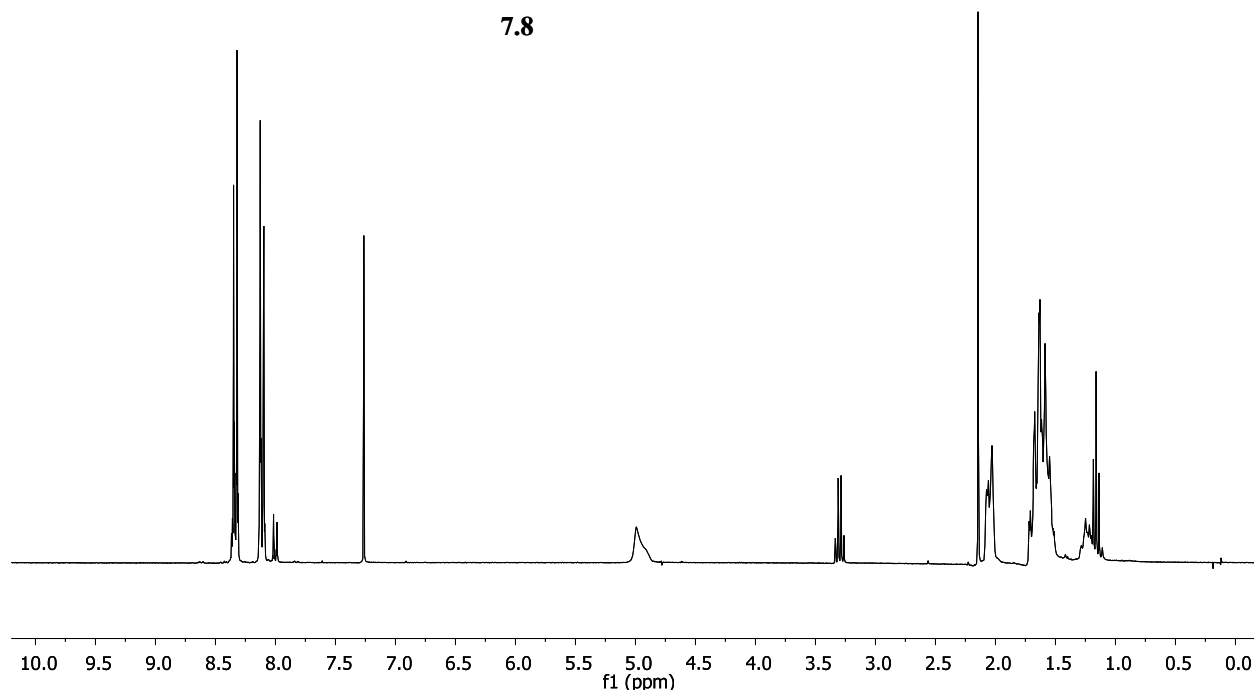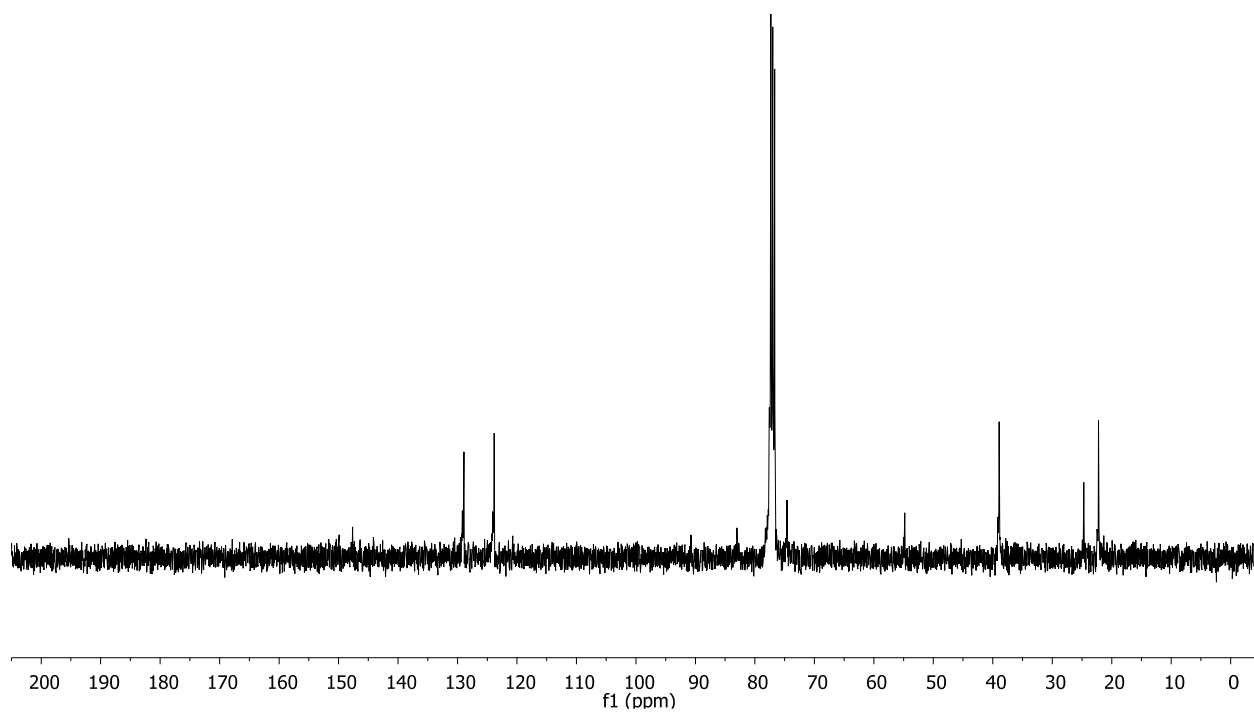

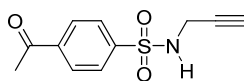

7.9

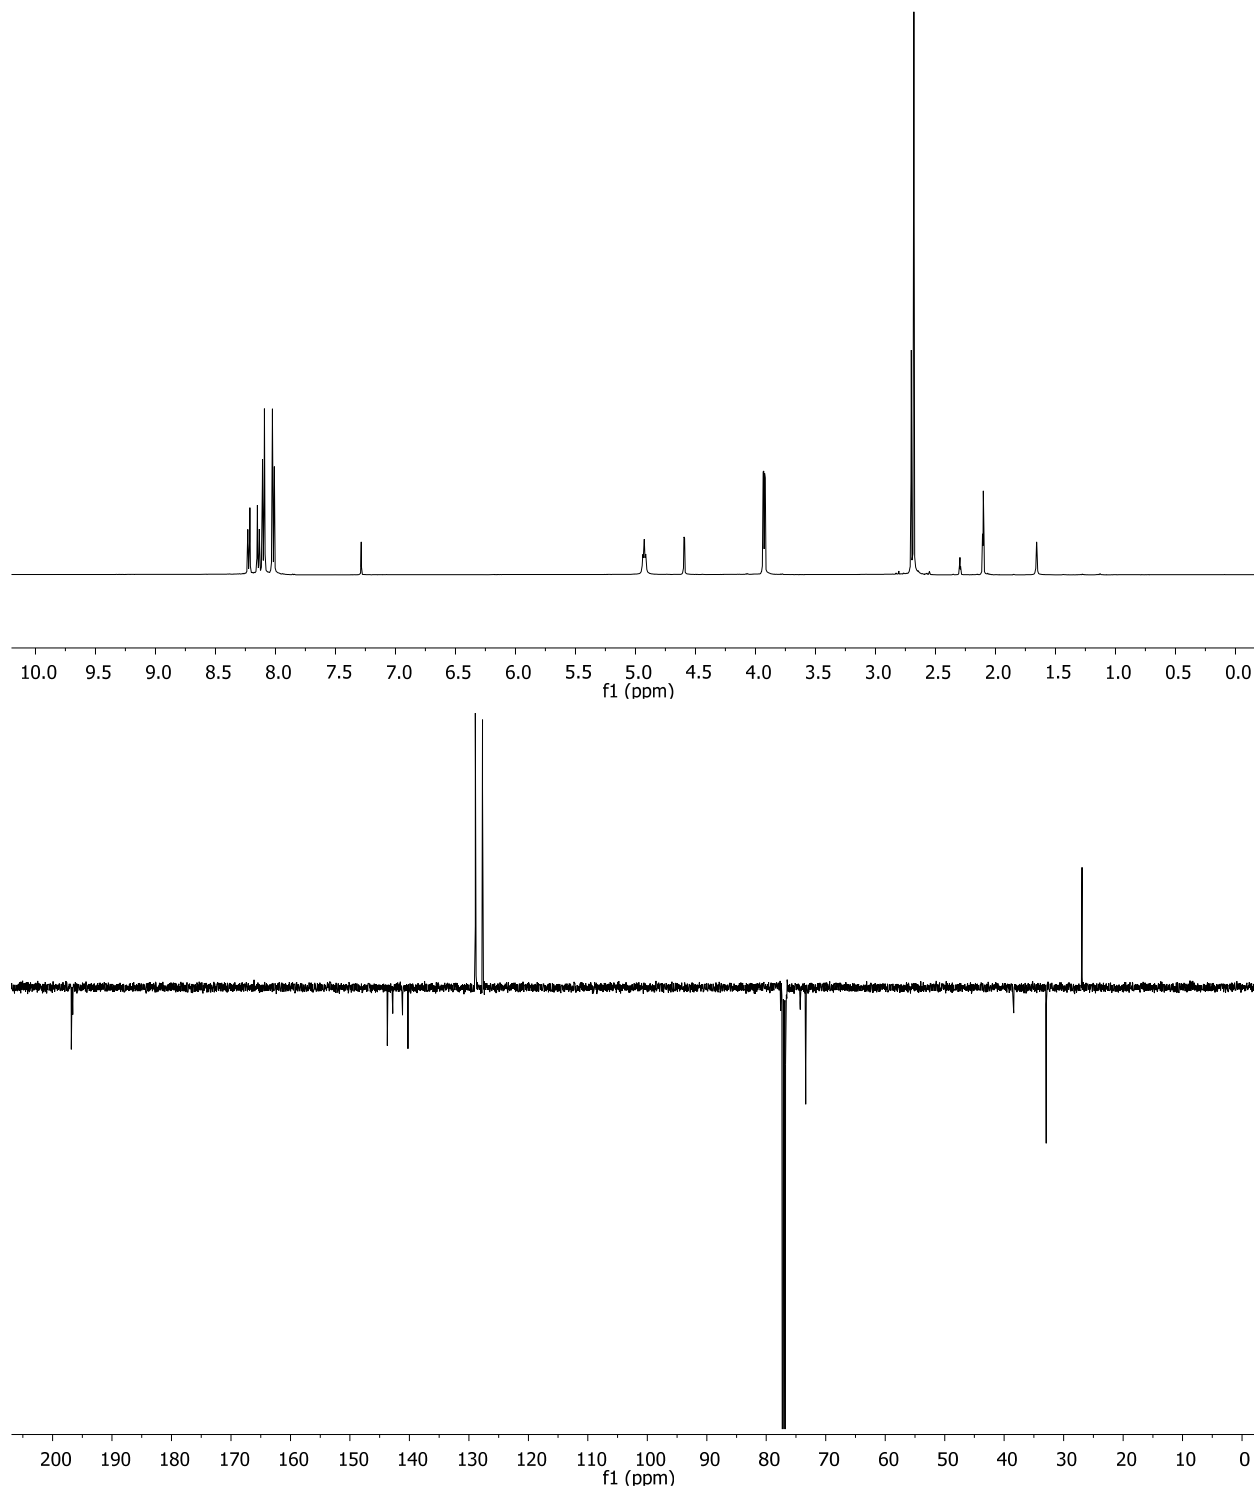

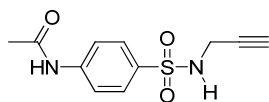

**7.10**

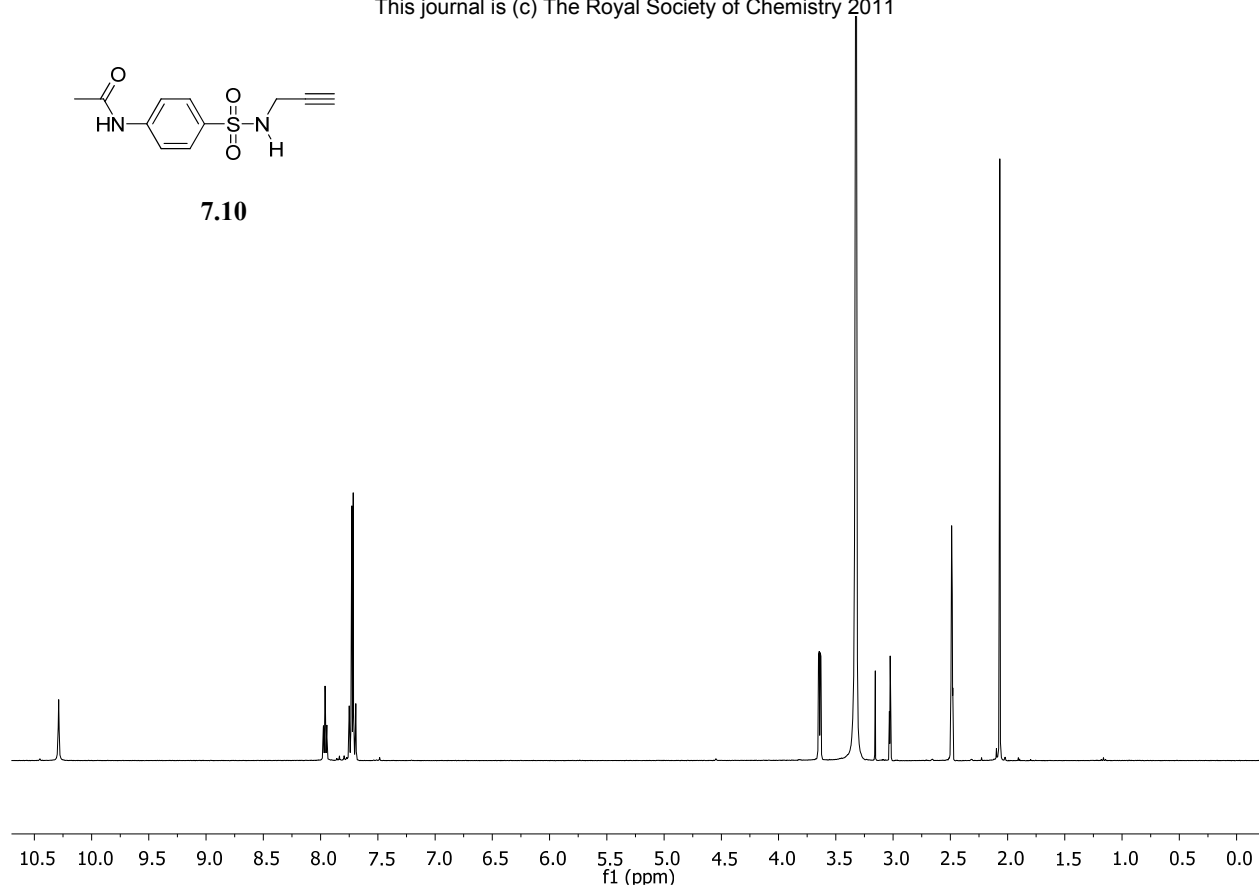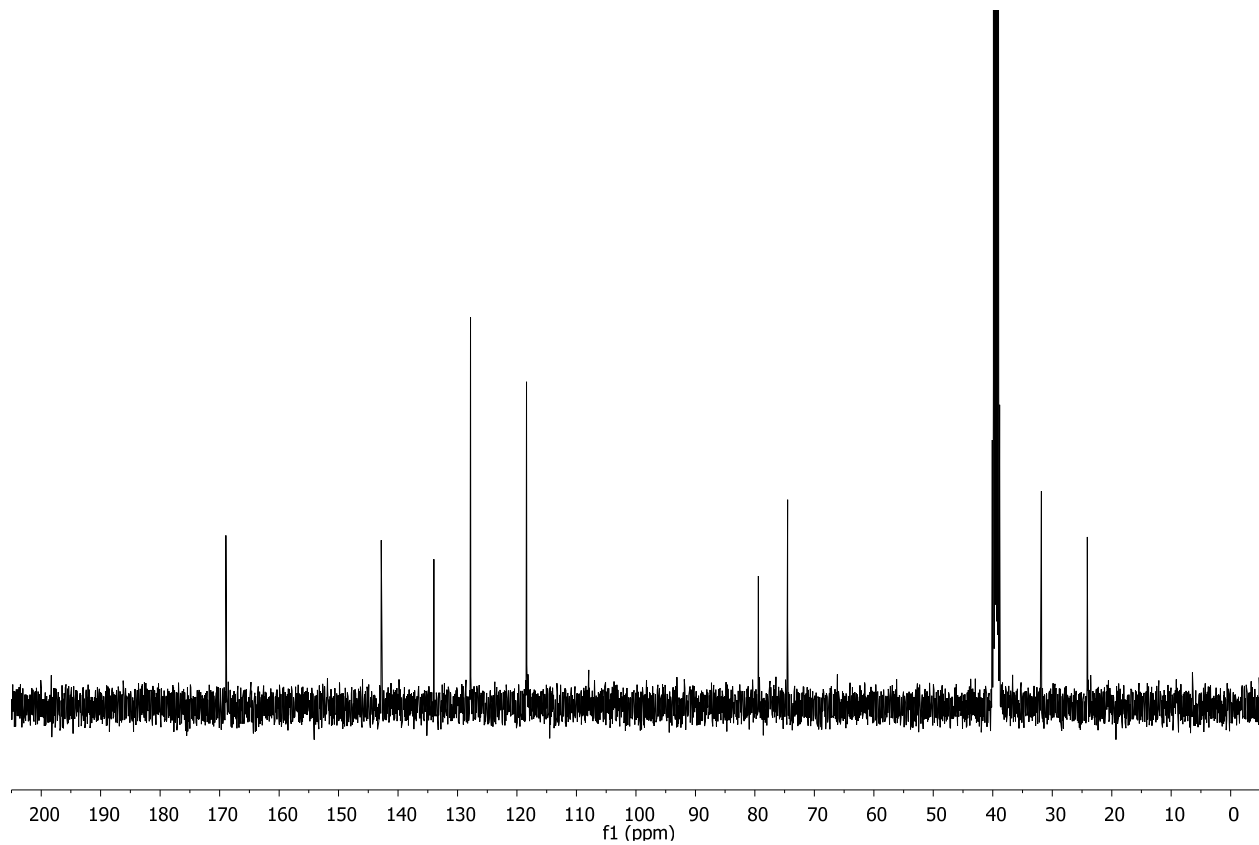

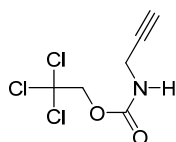

7.11

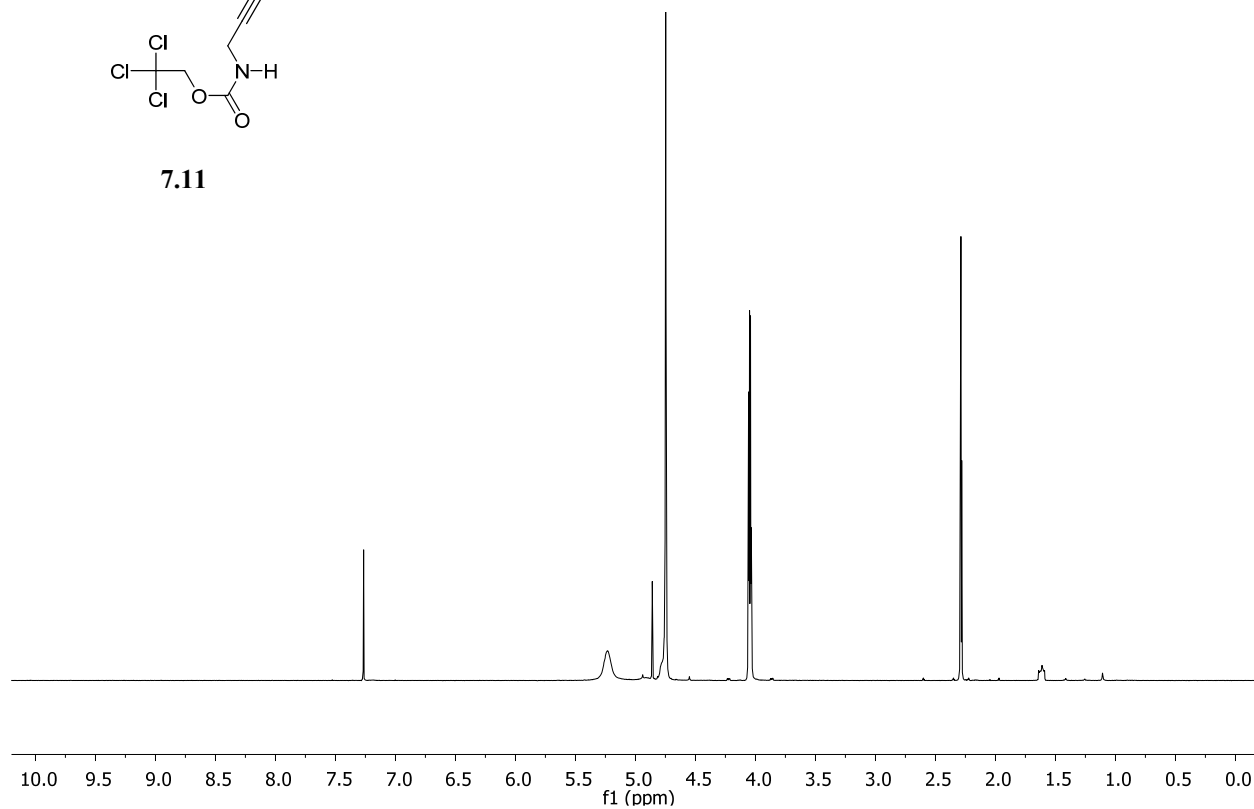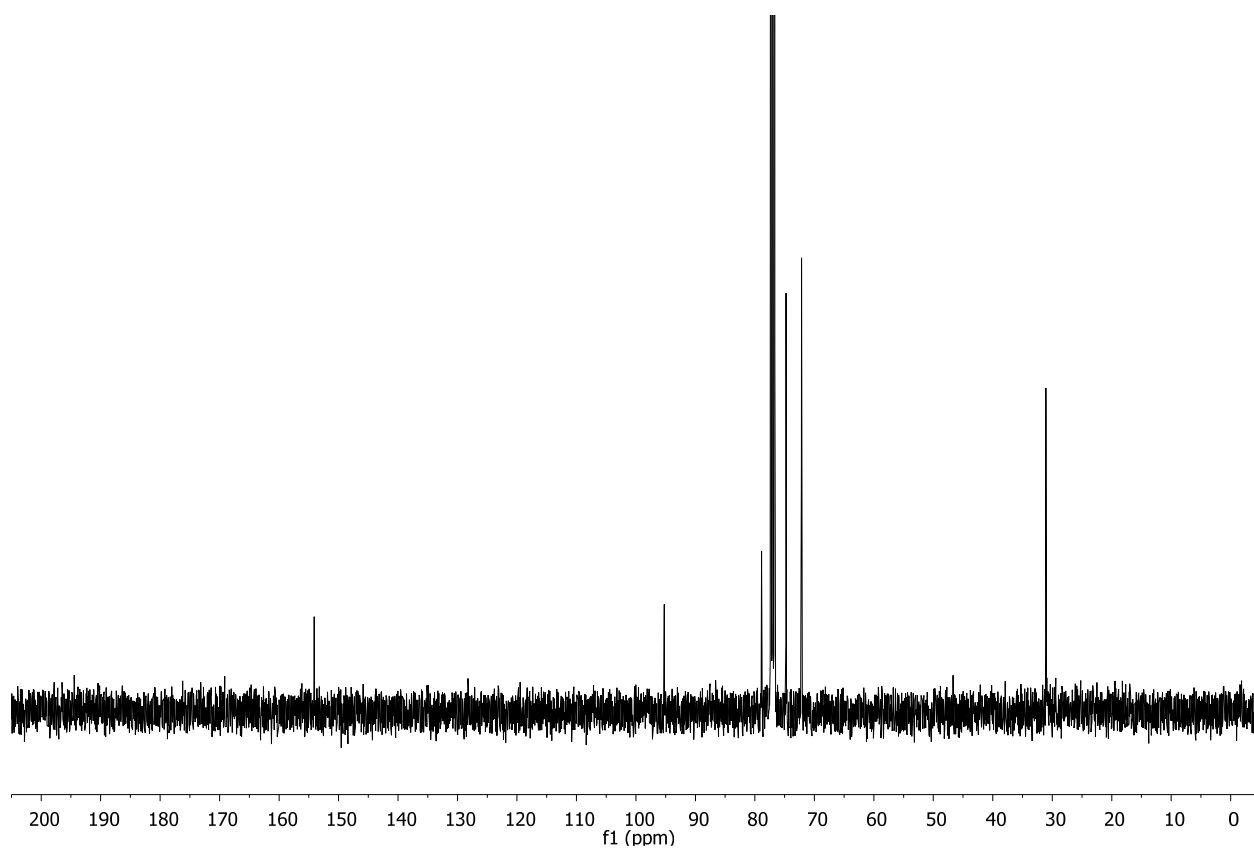



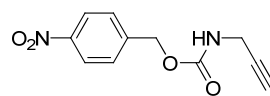

**7.13**

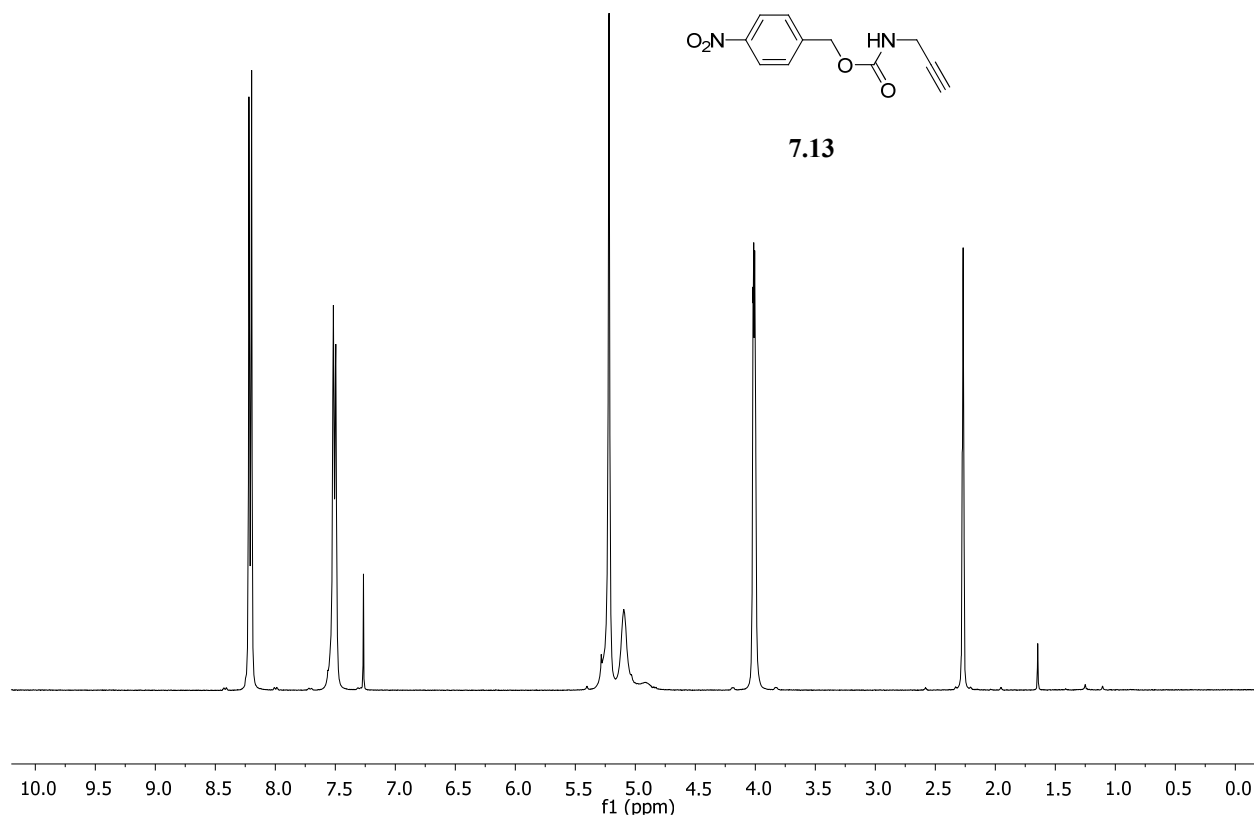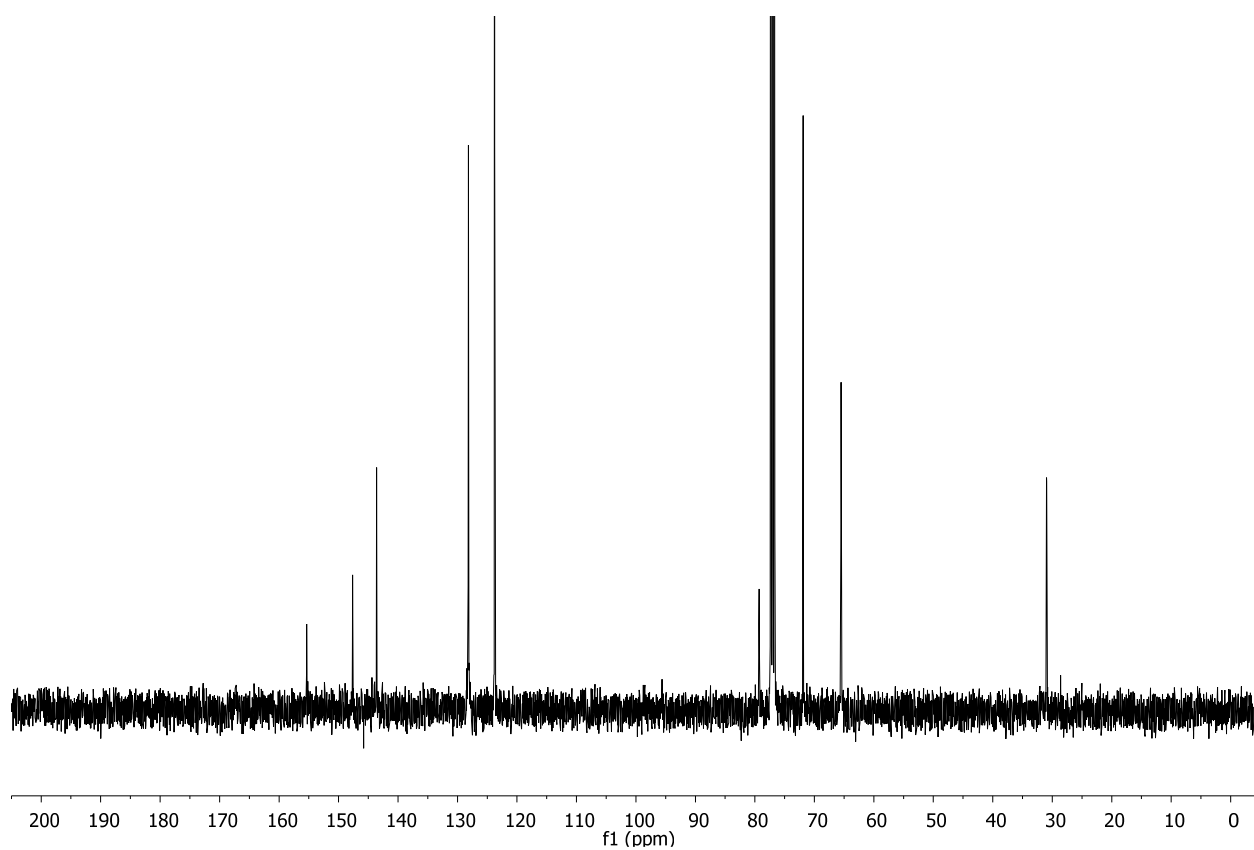

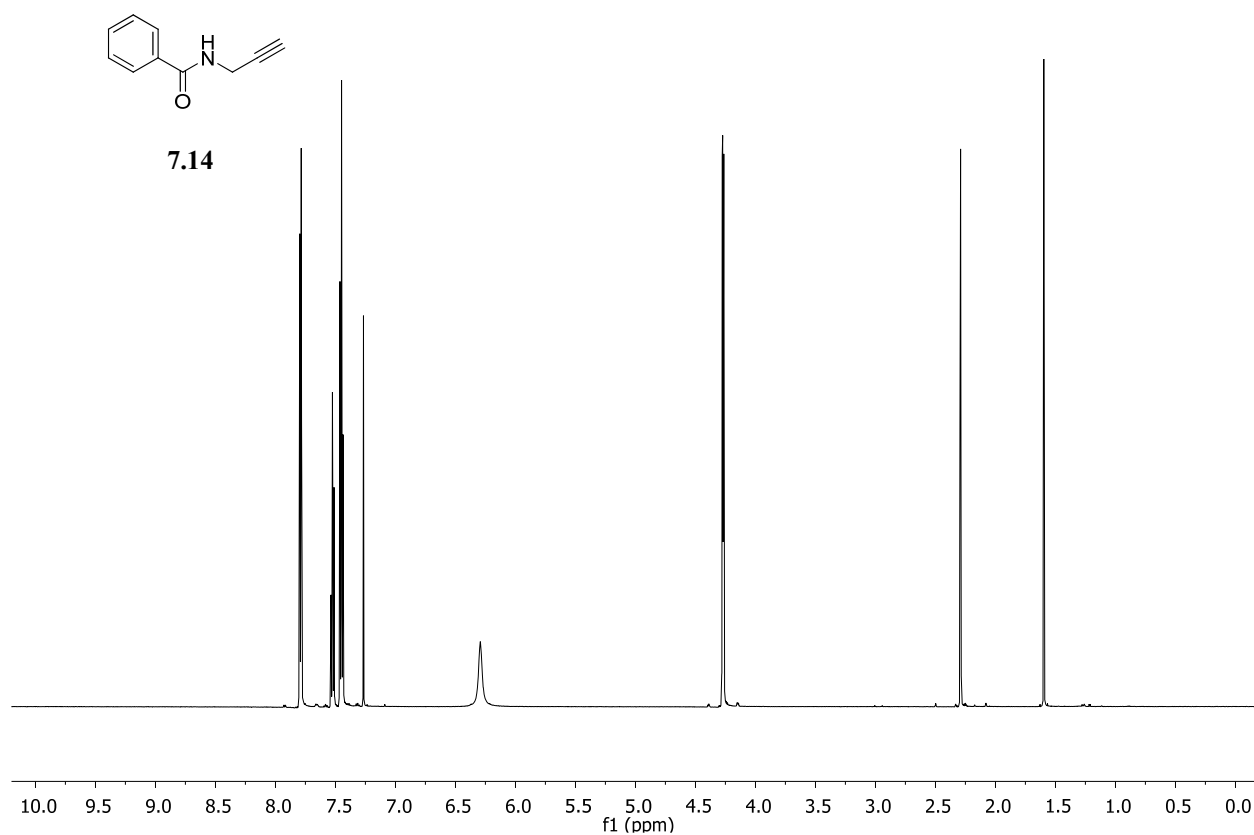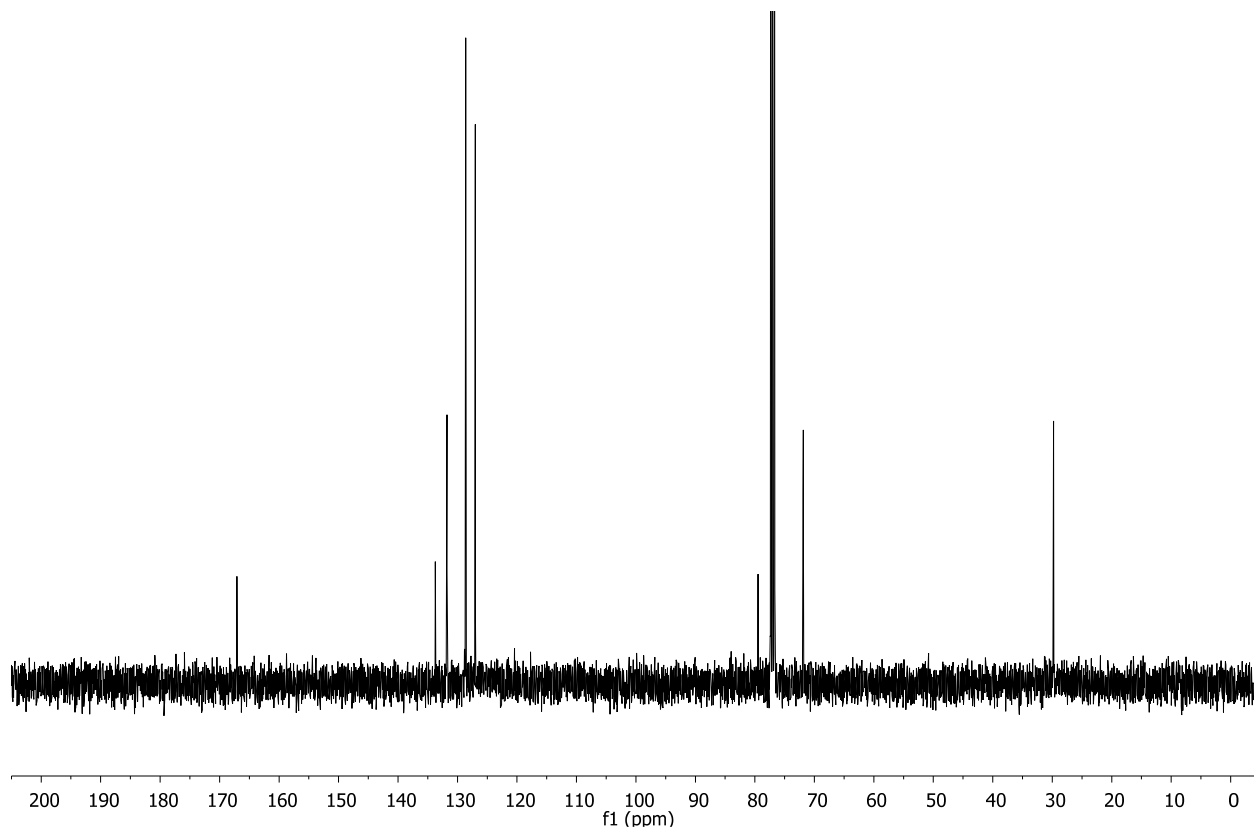

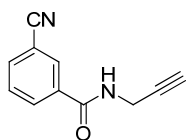

7.15

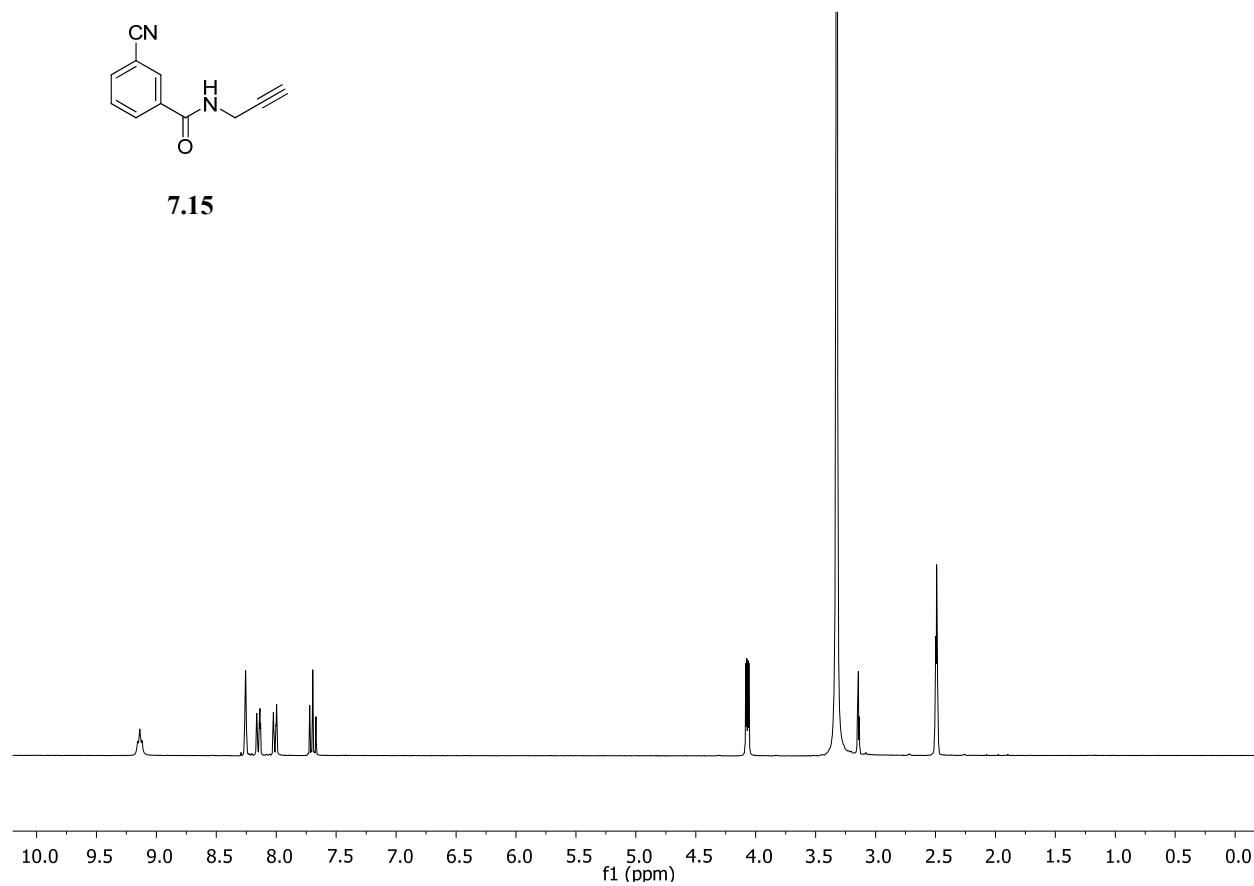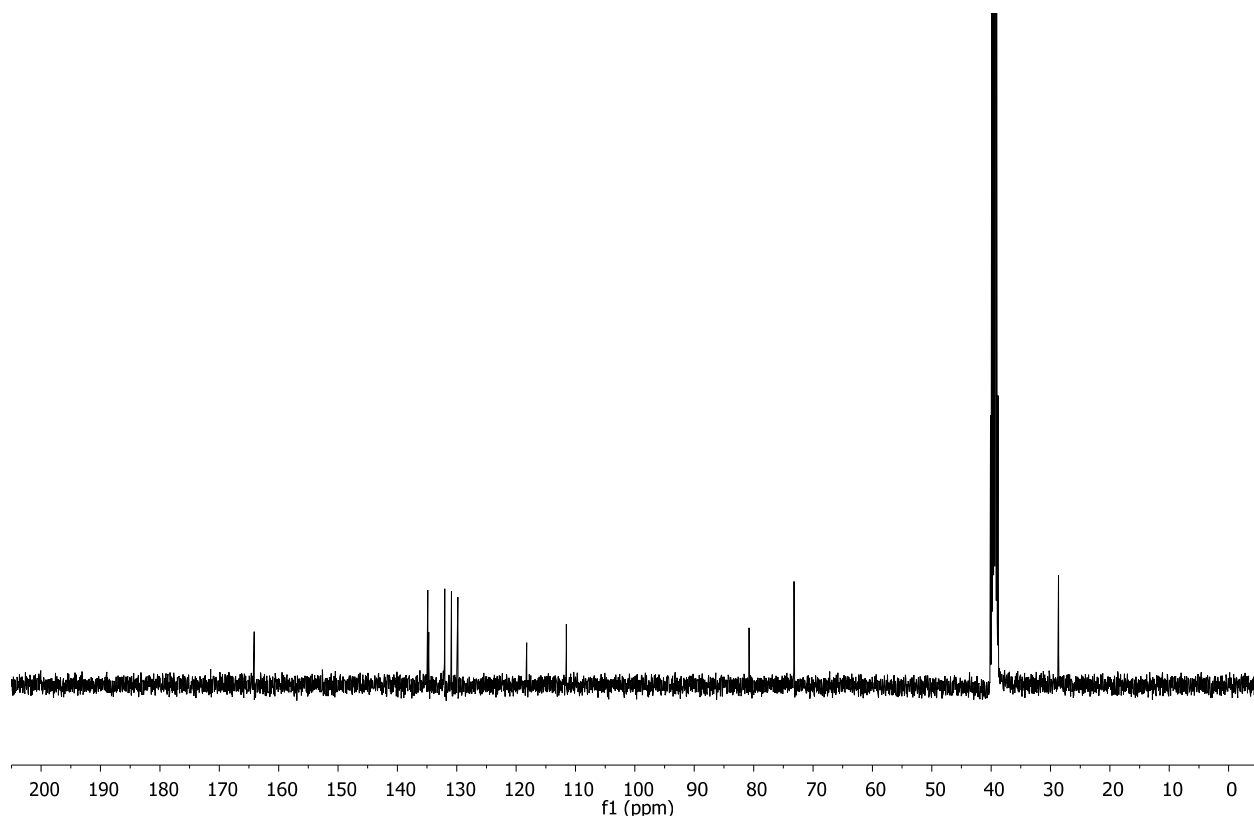

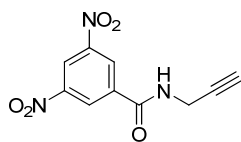

7.17

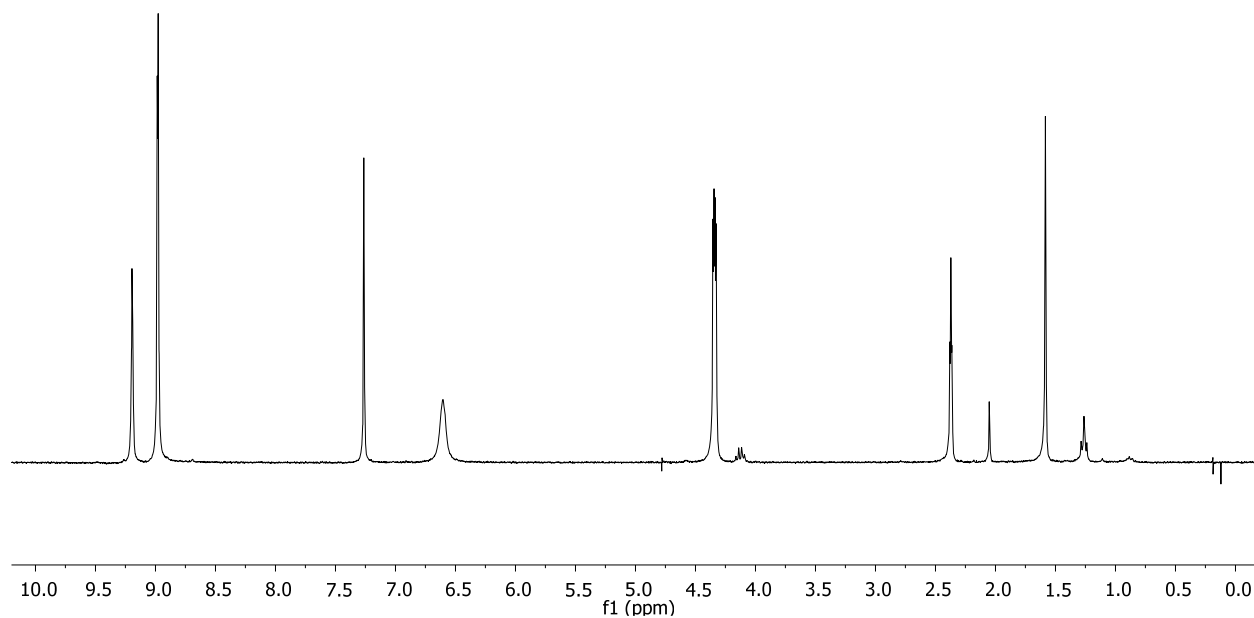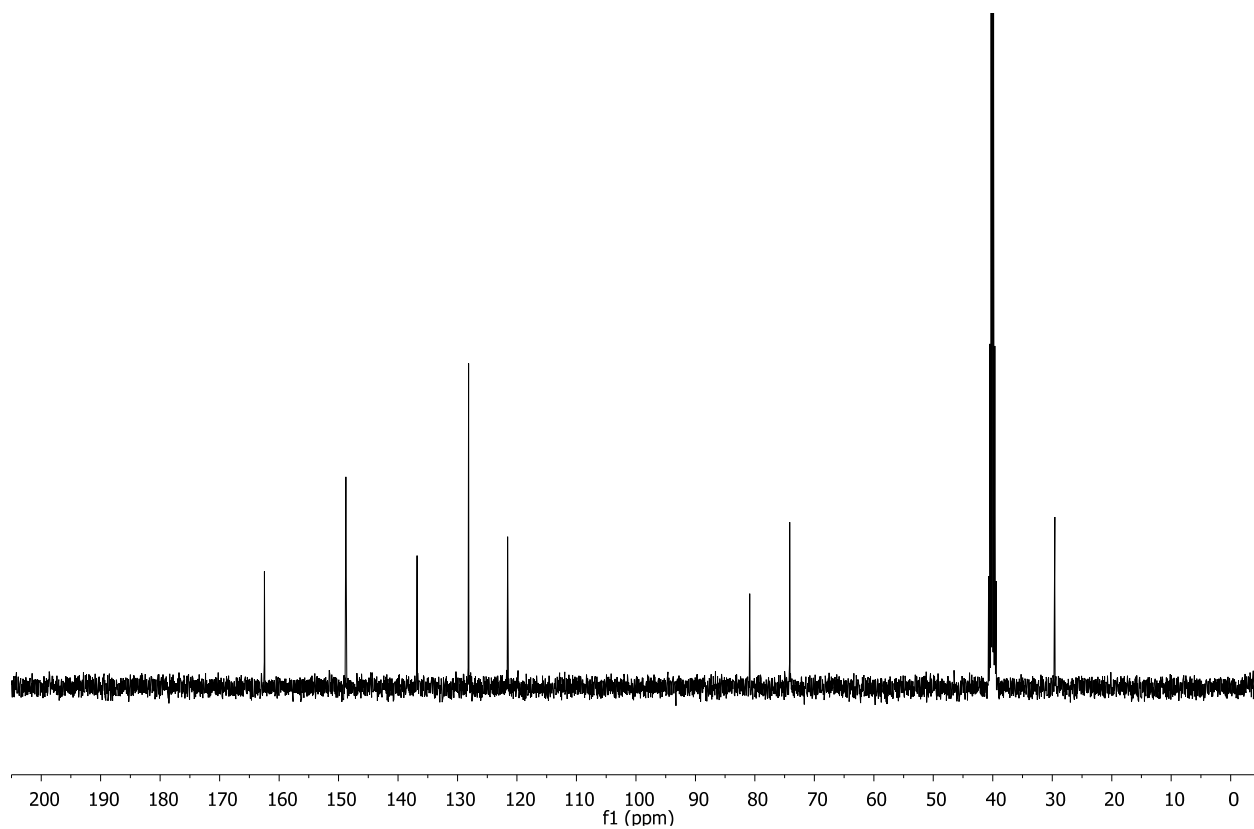

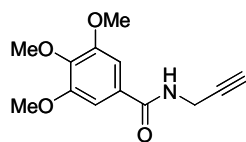

**7.18**

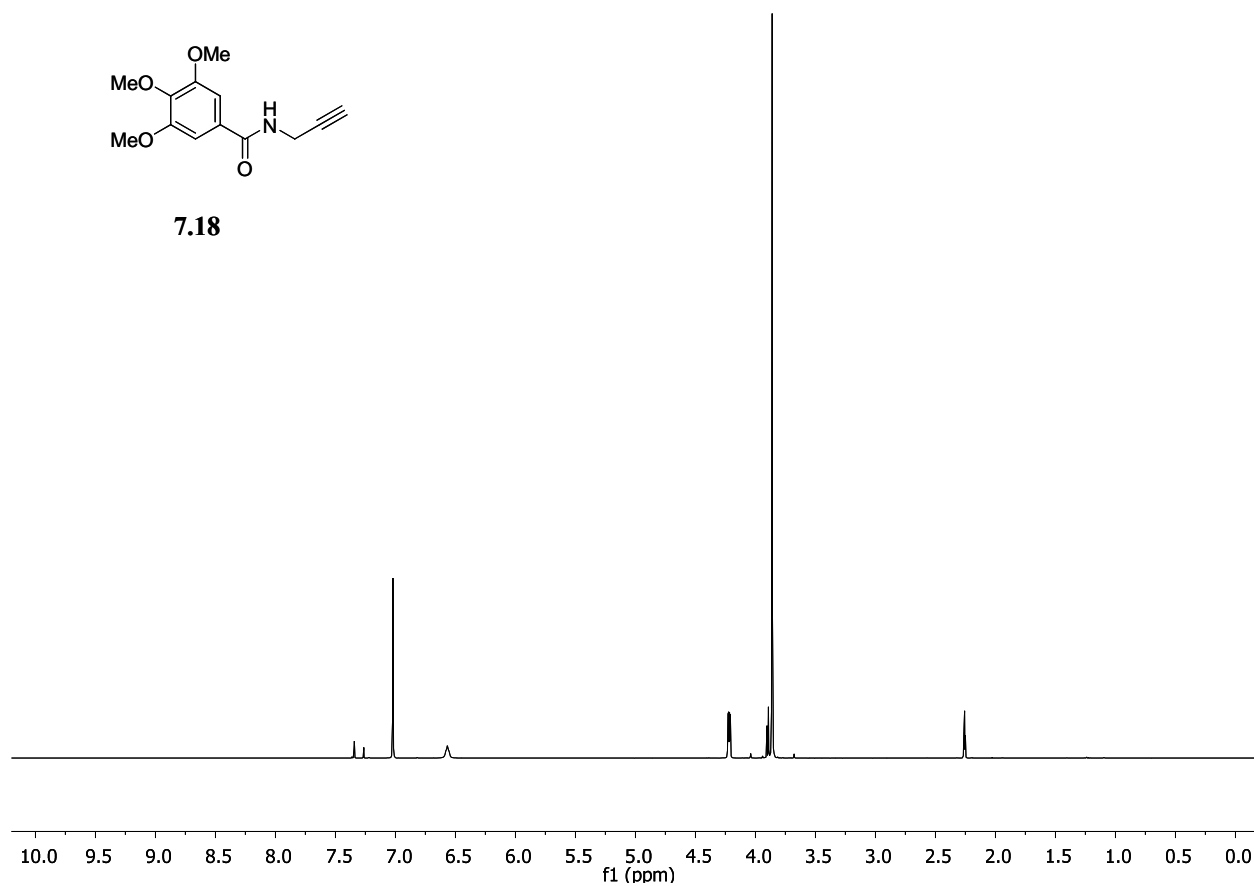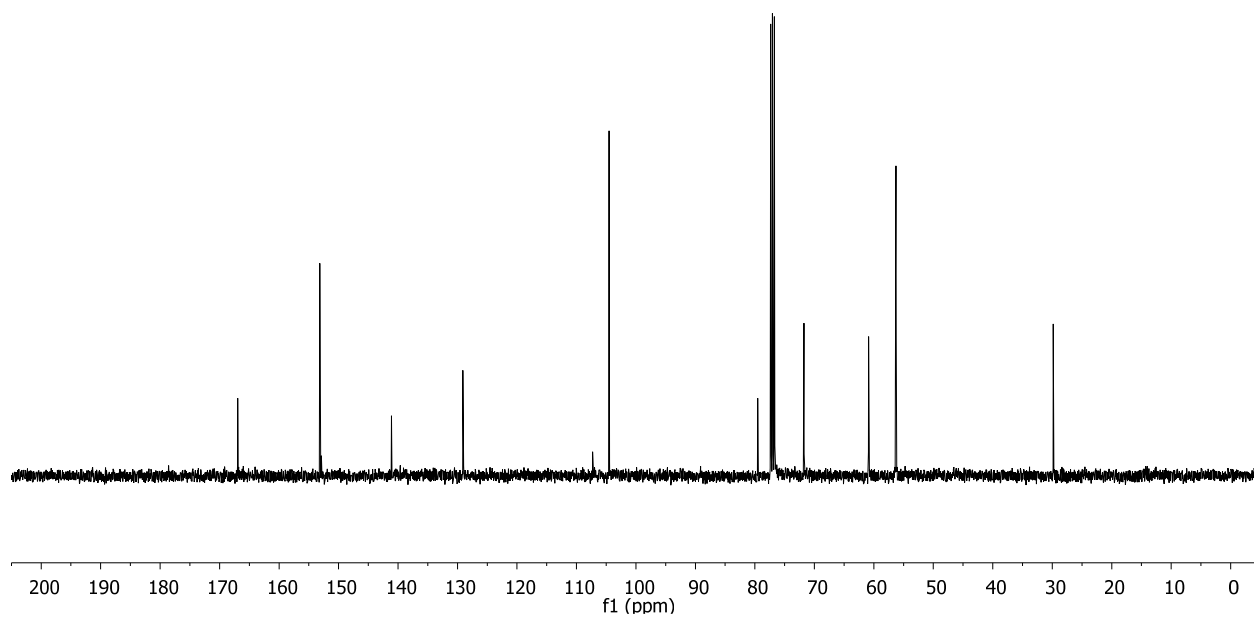

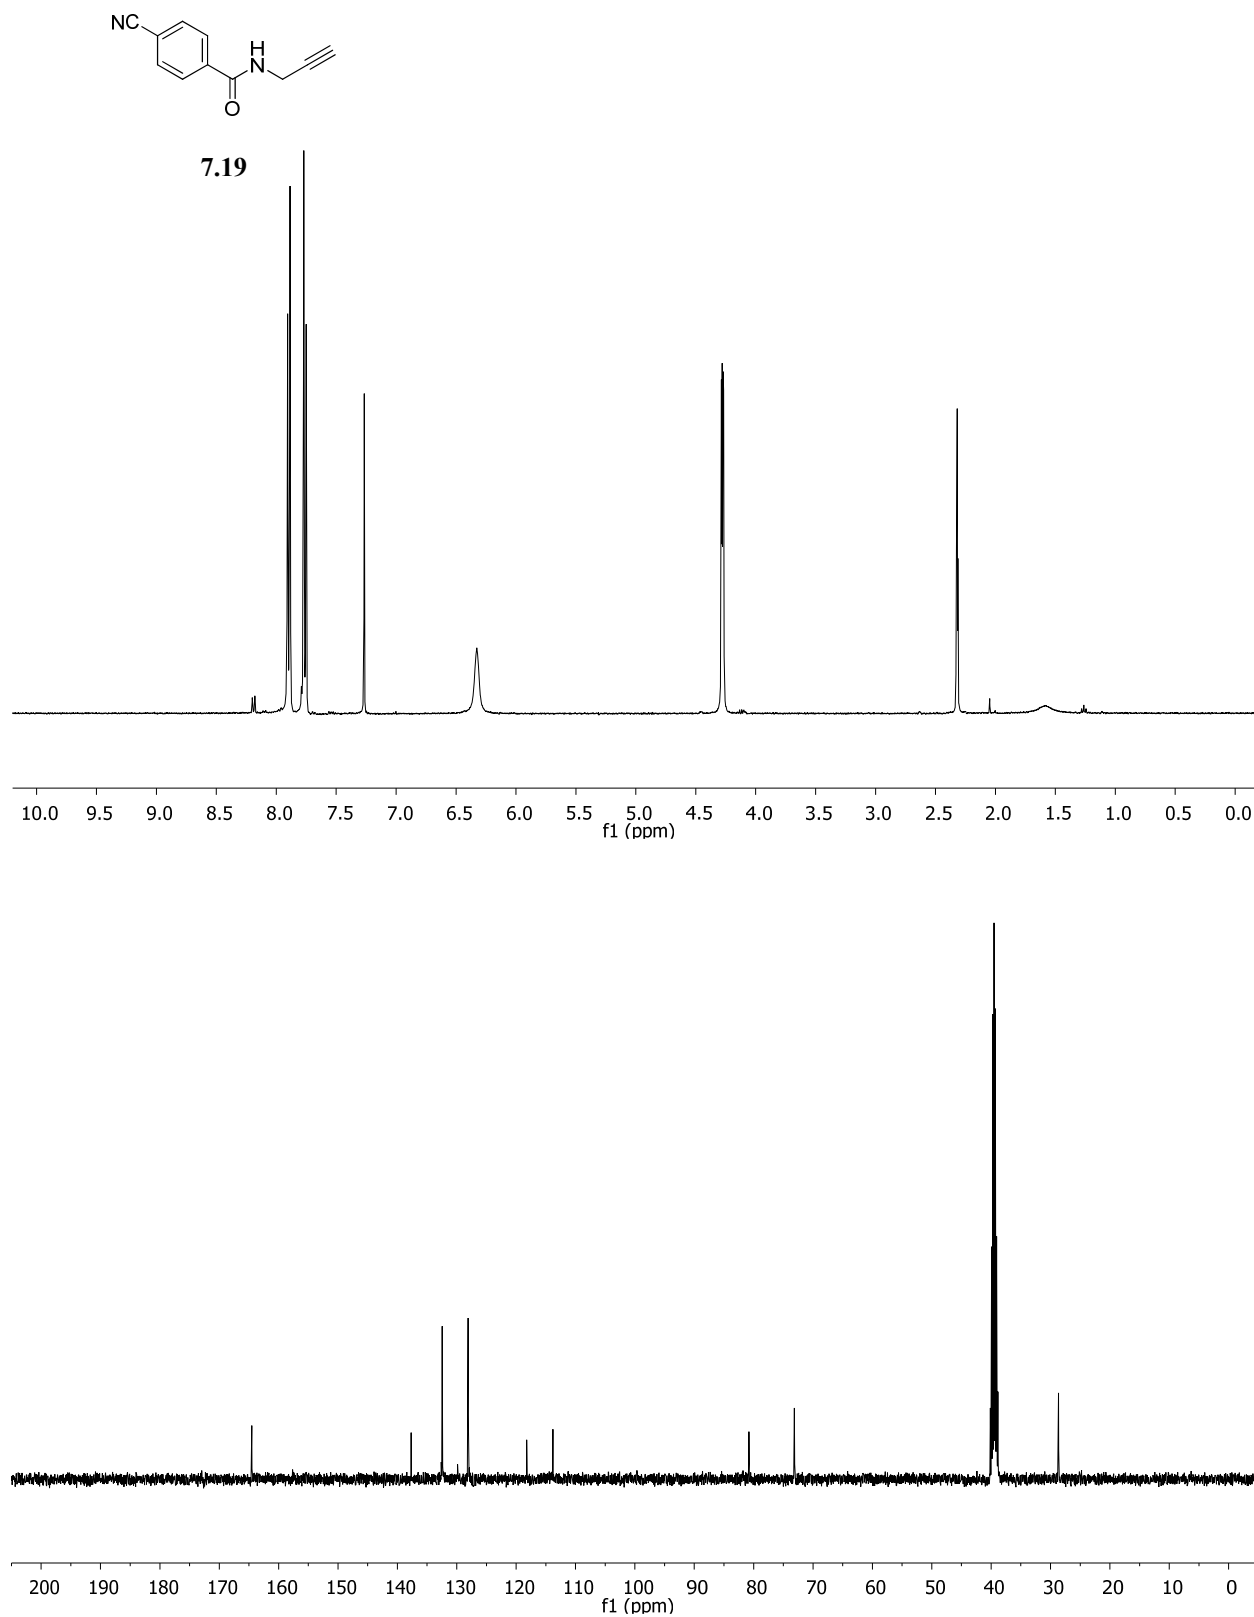

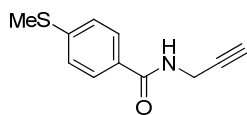

**7.20**

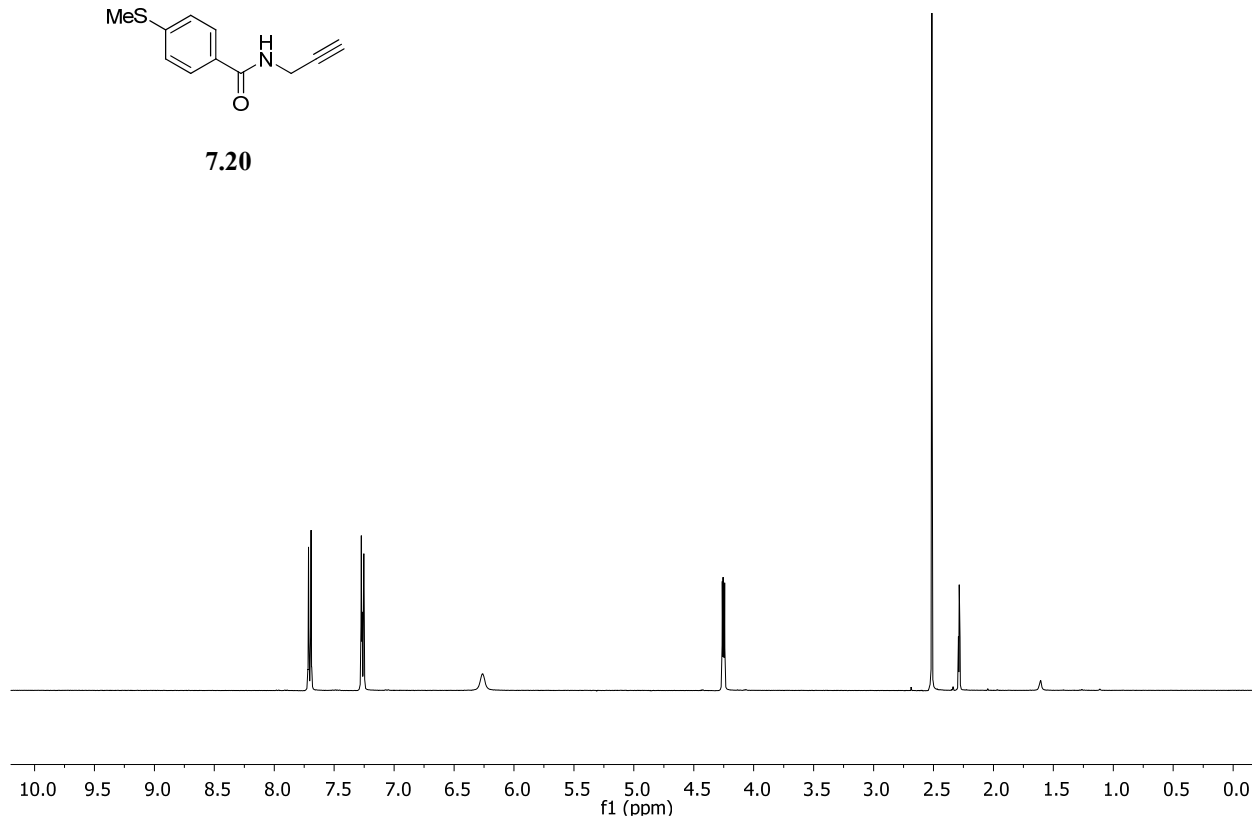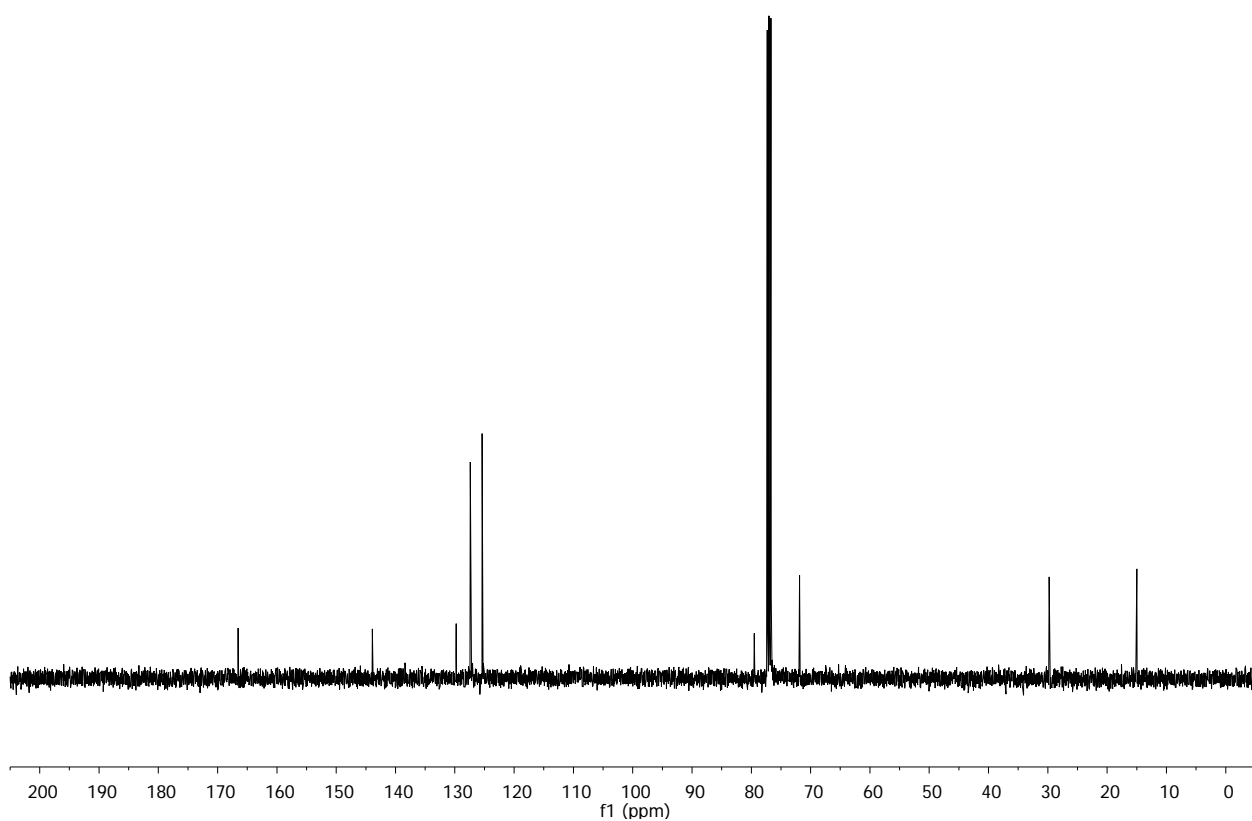

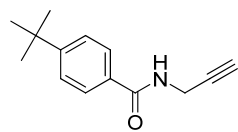

**7.21**

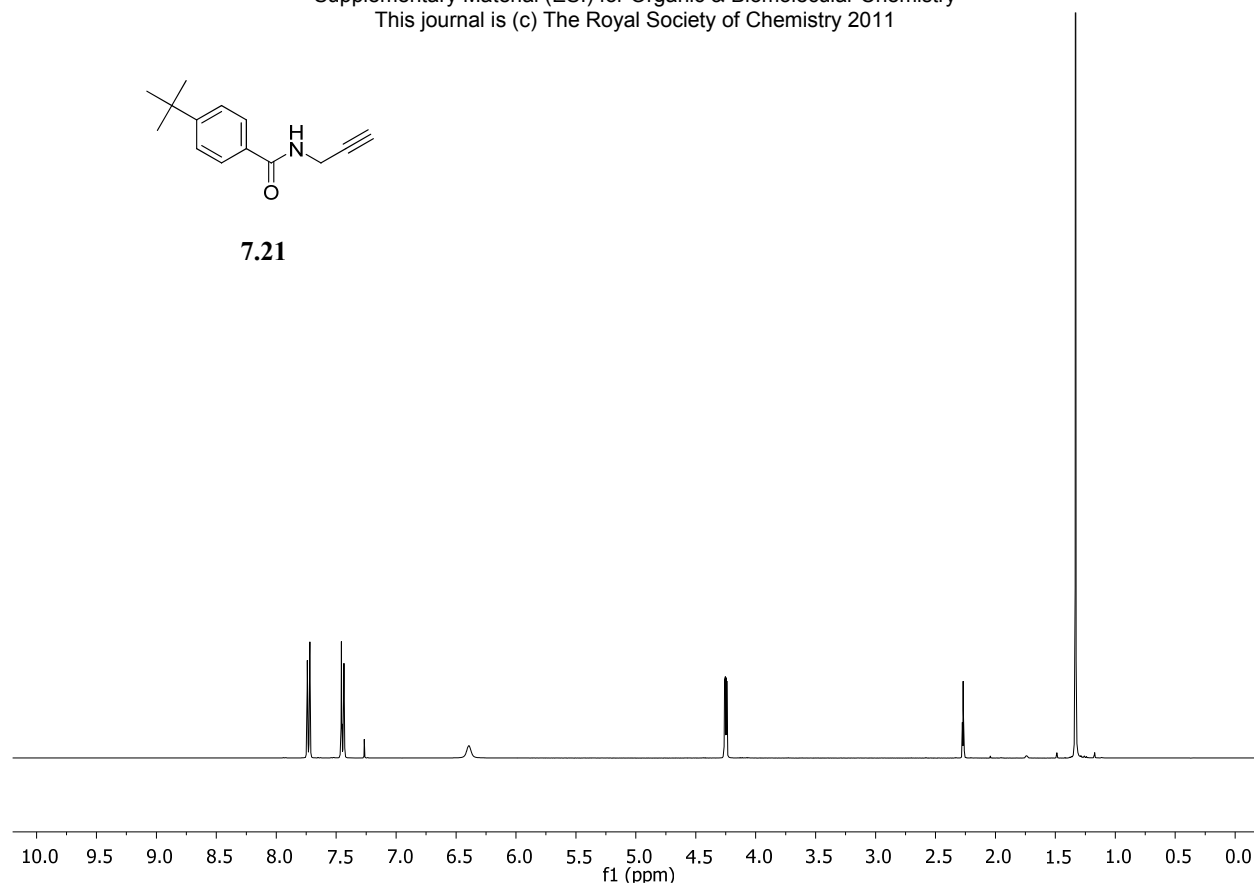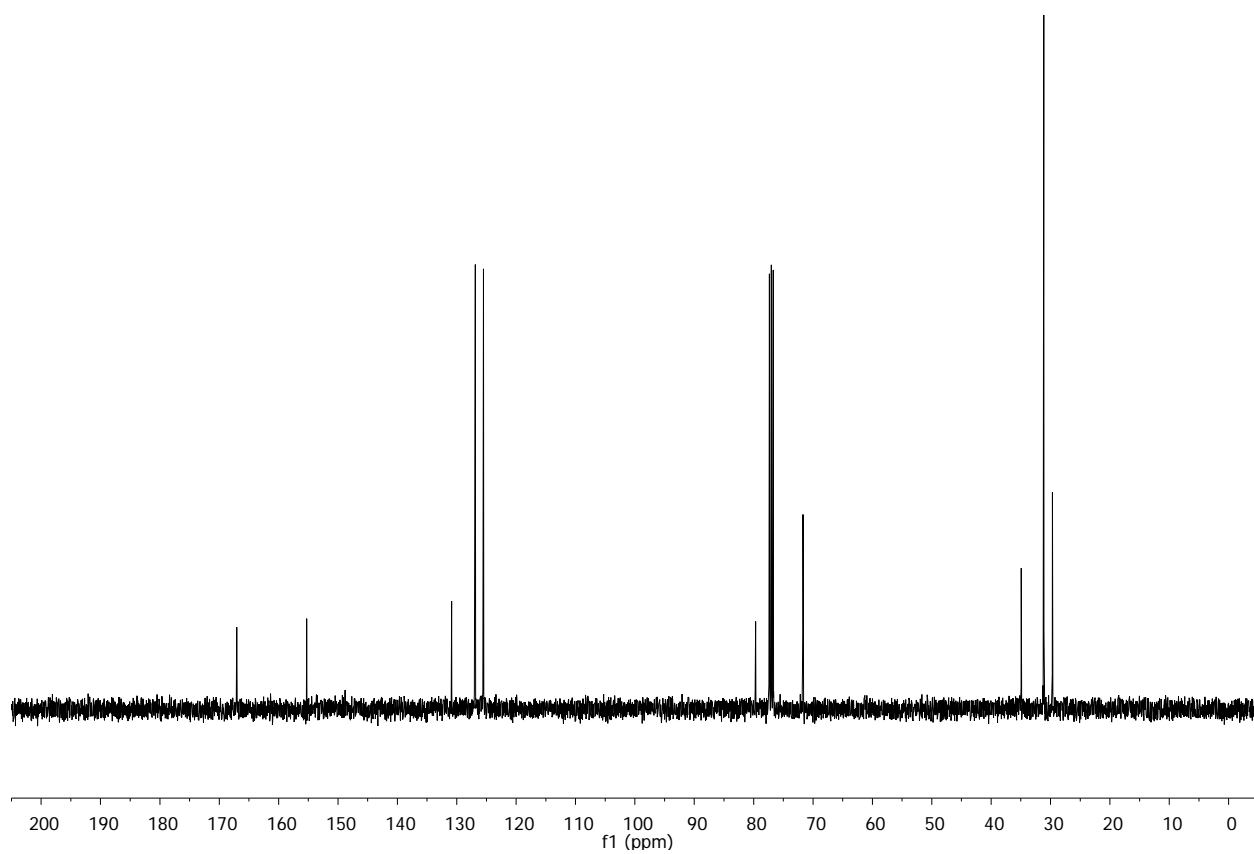



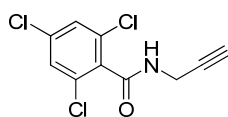

7.22

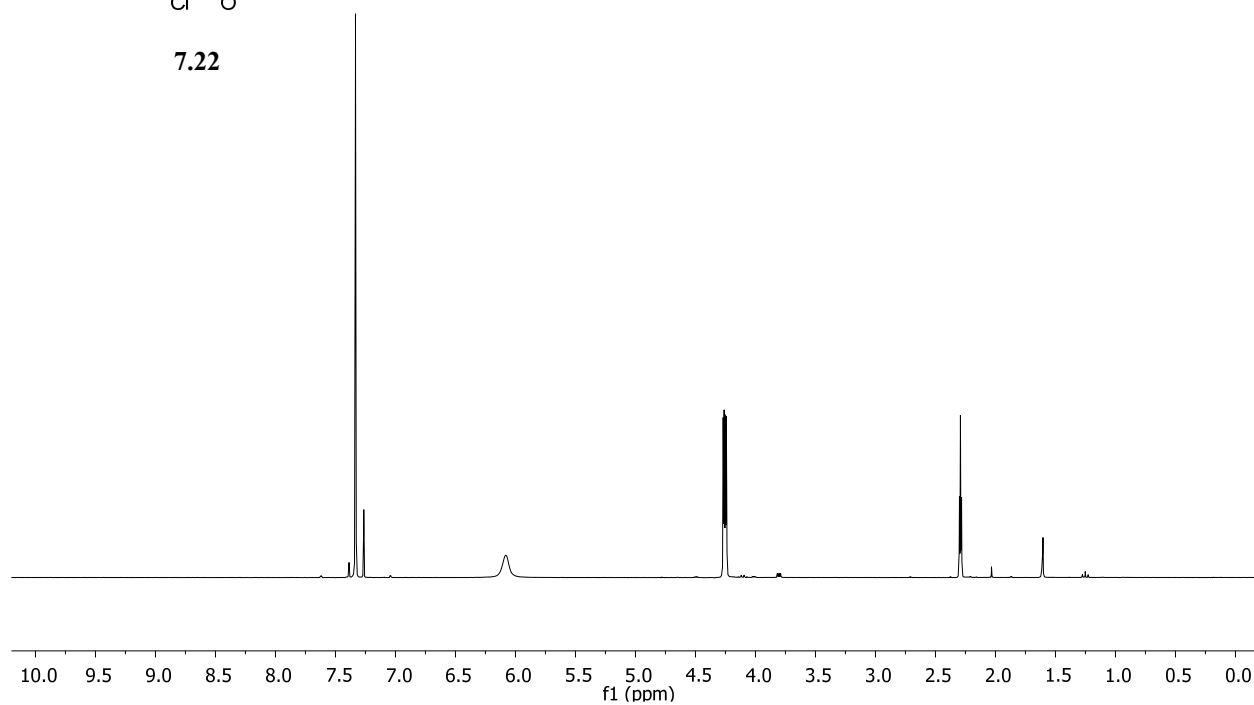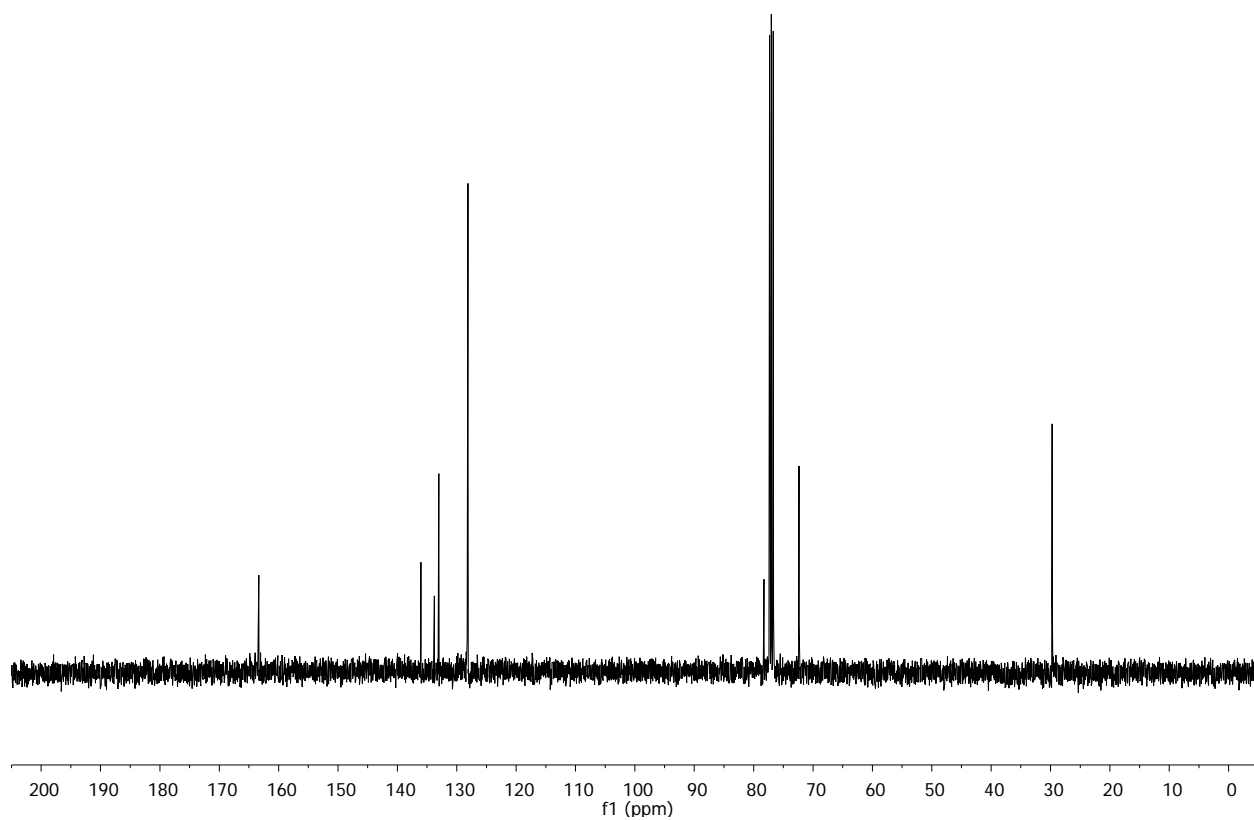

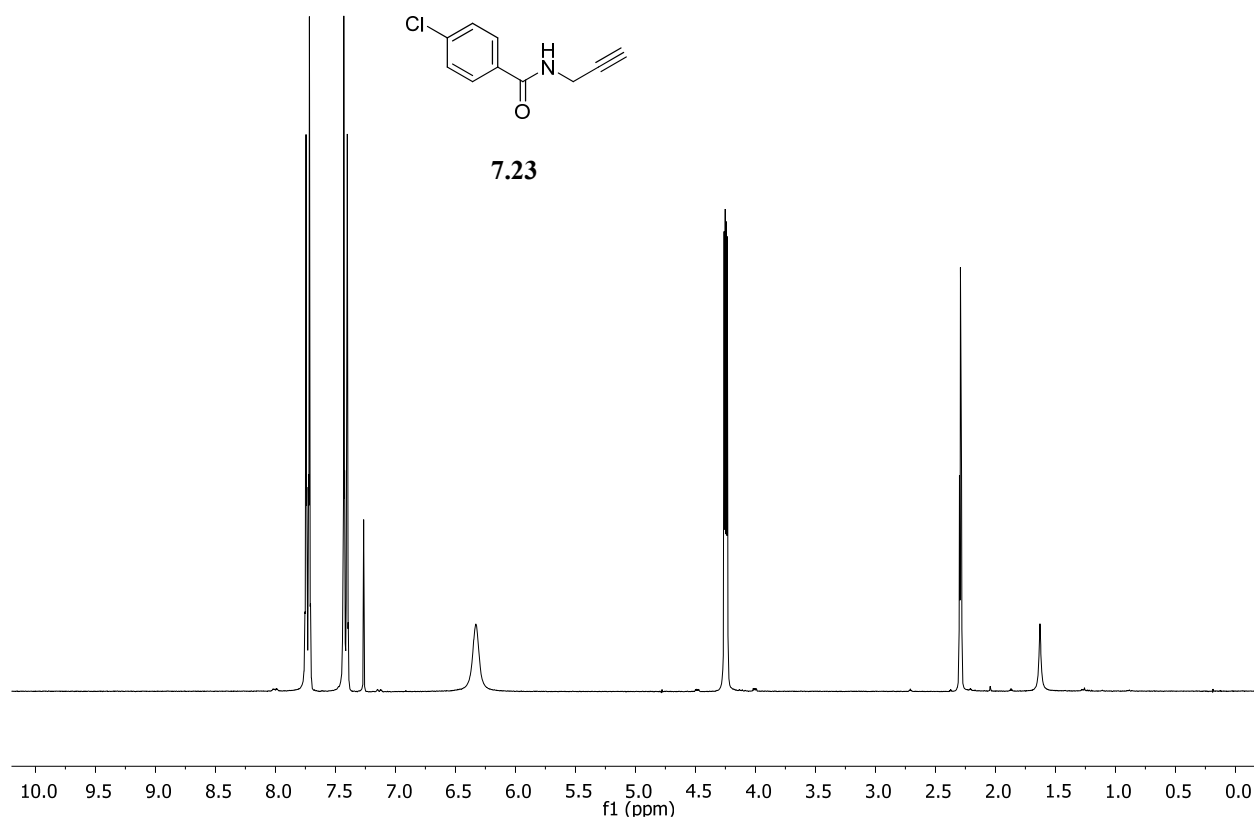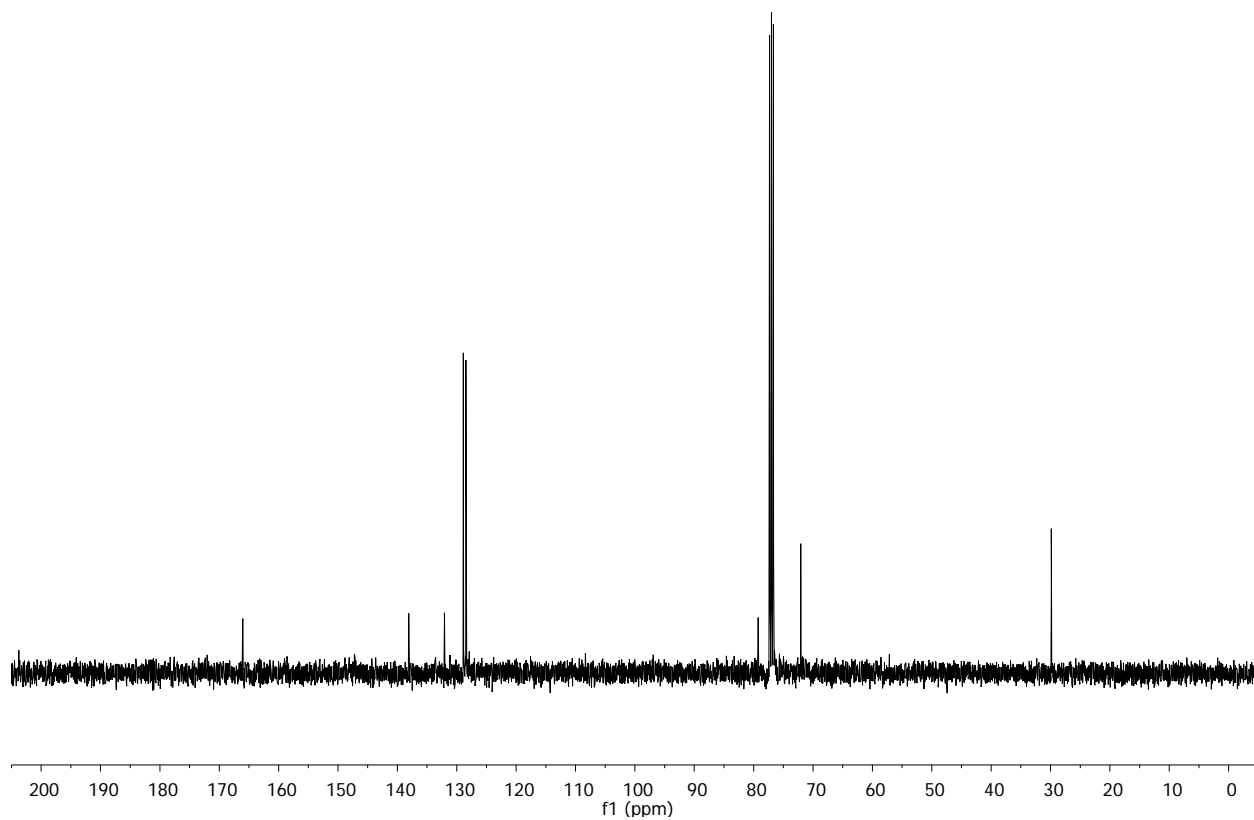

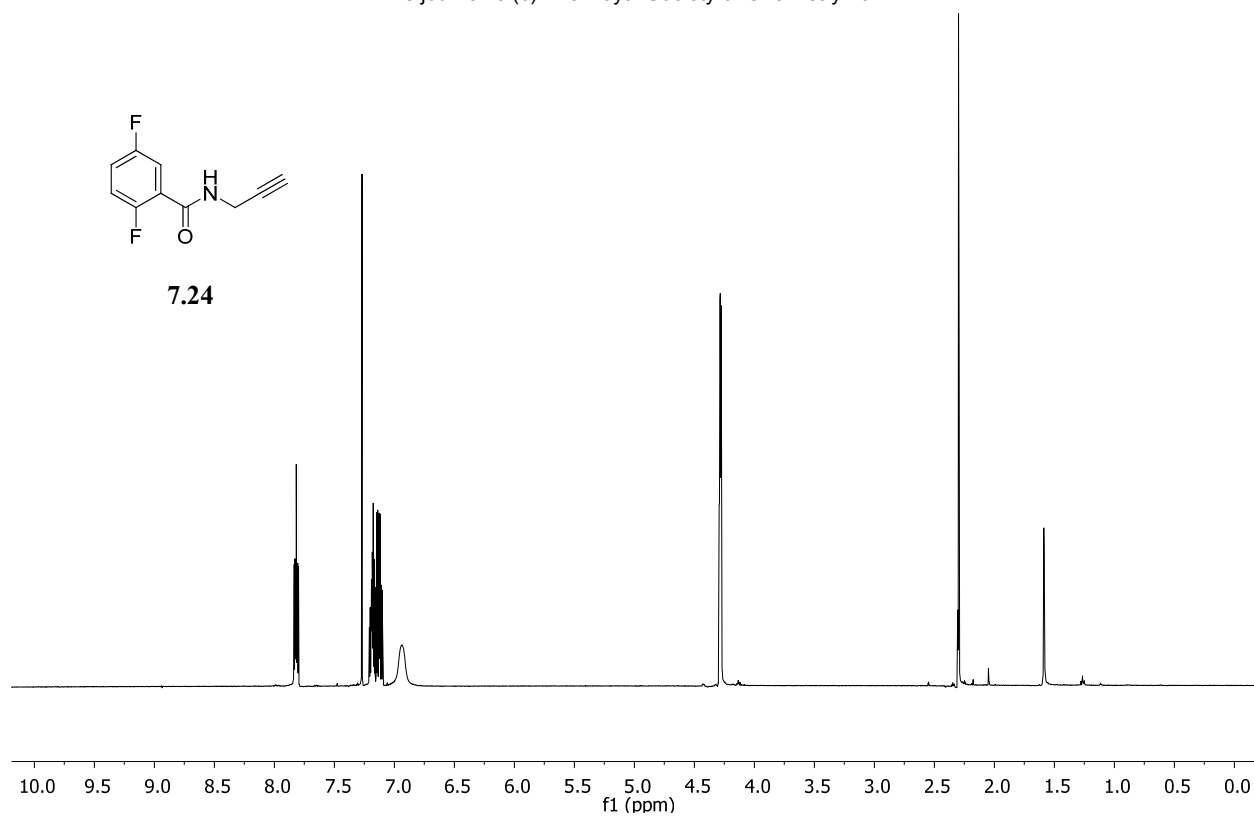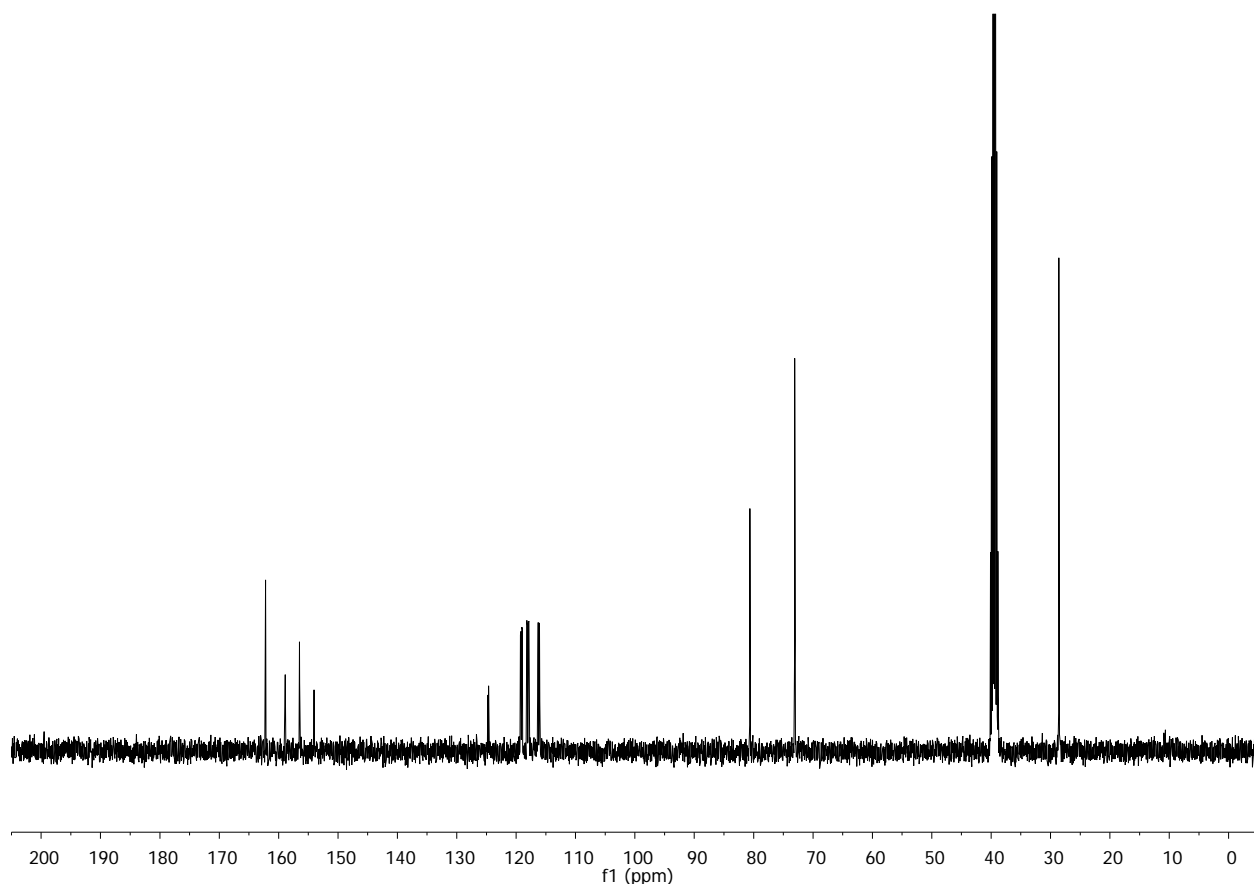

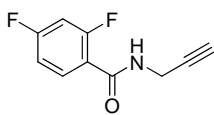

7.25

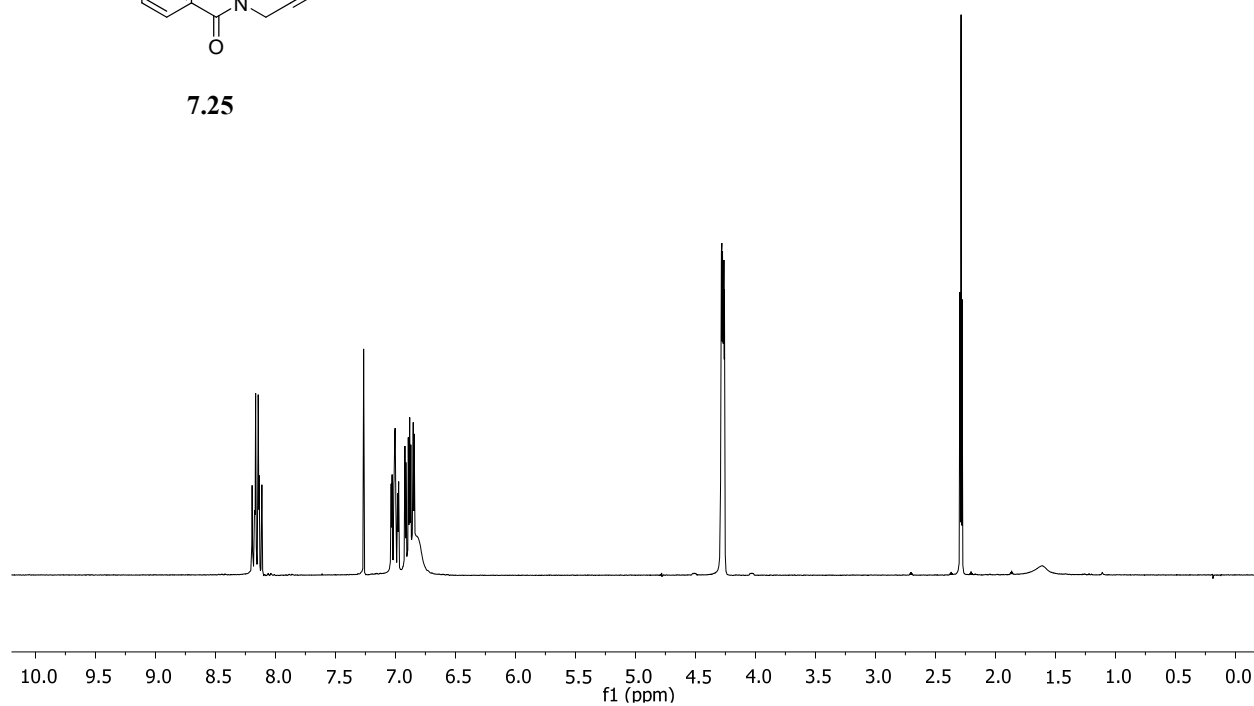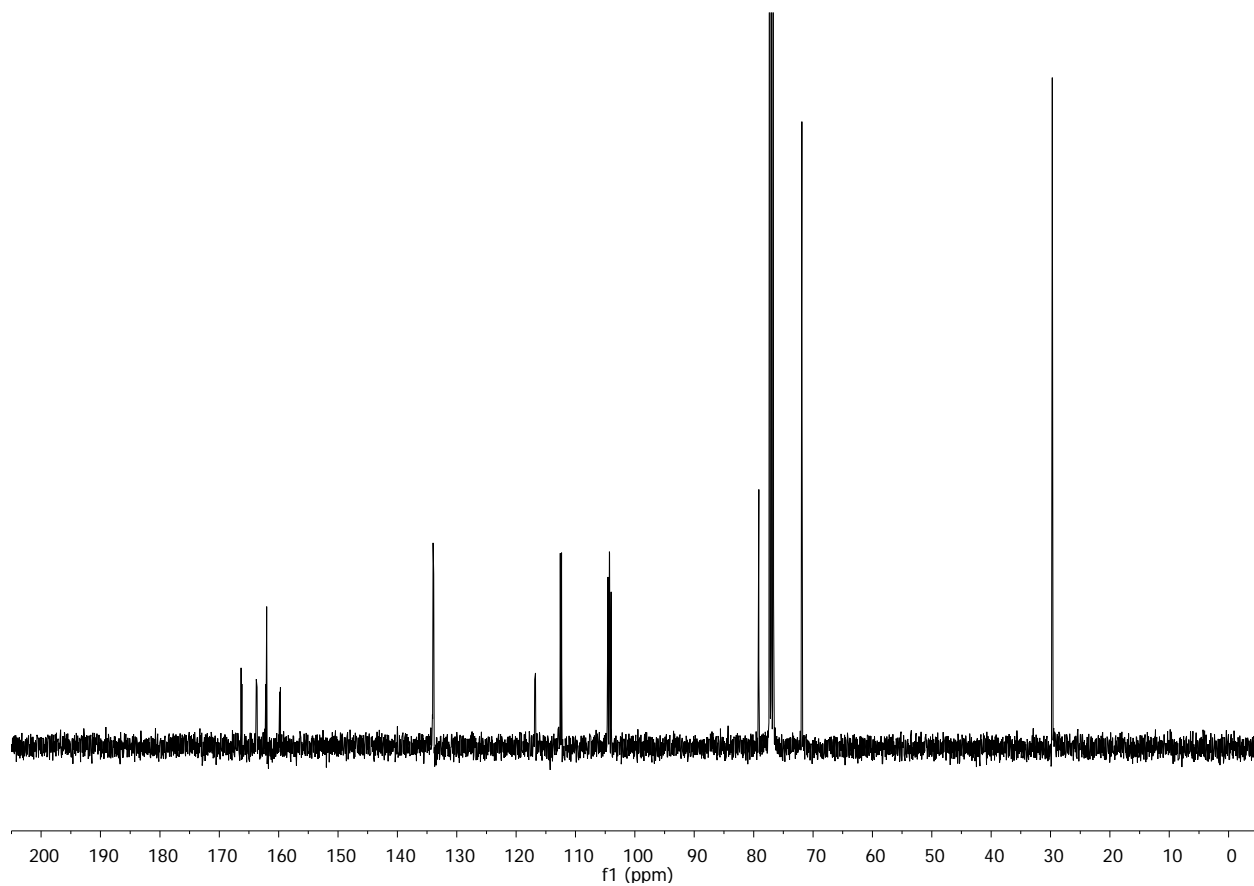

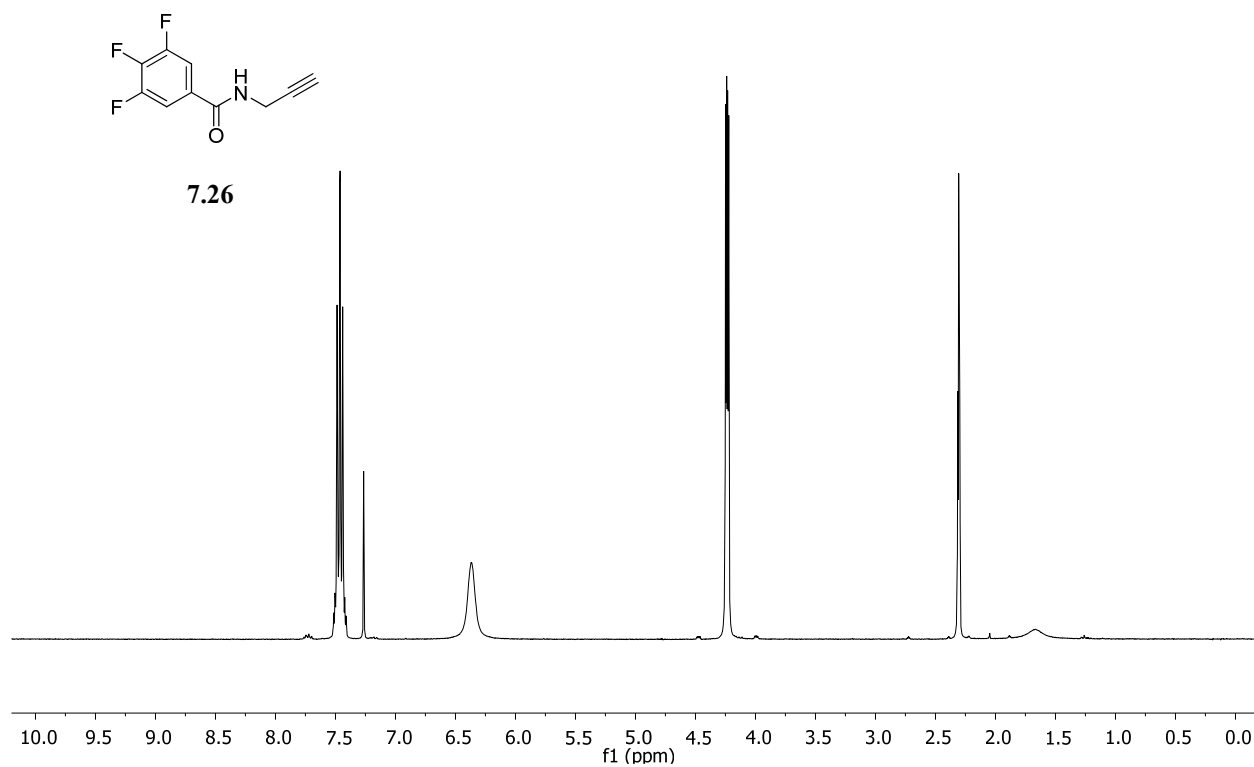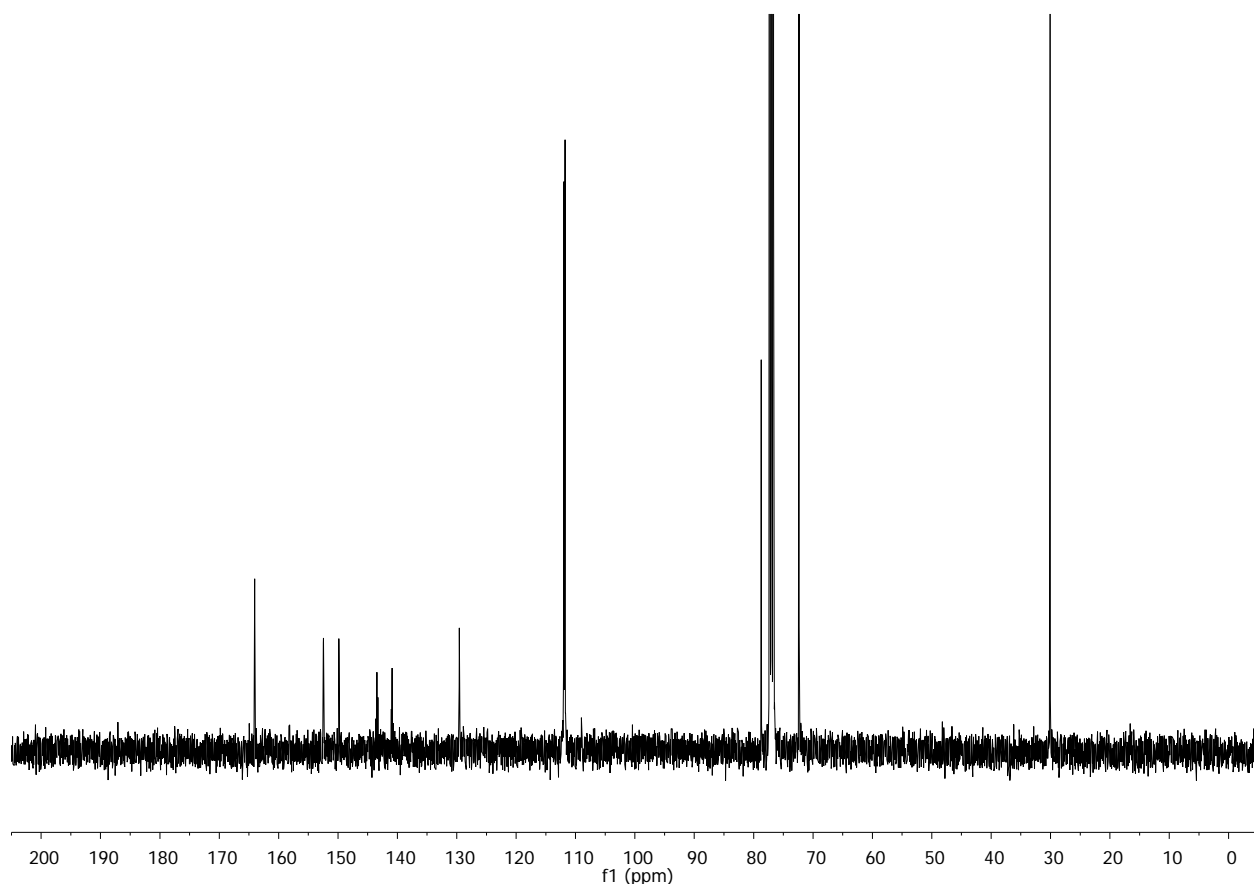

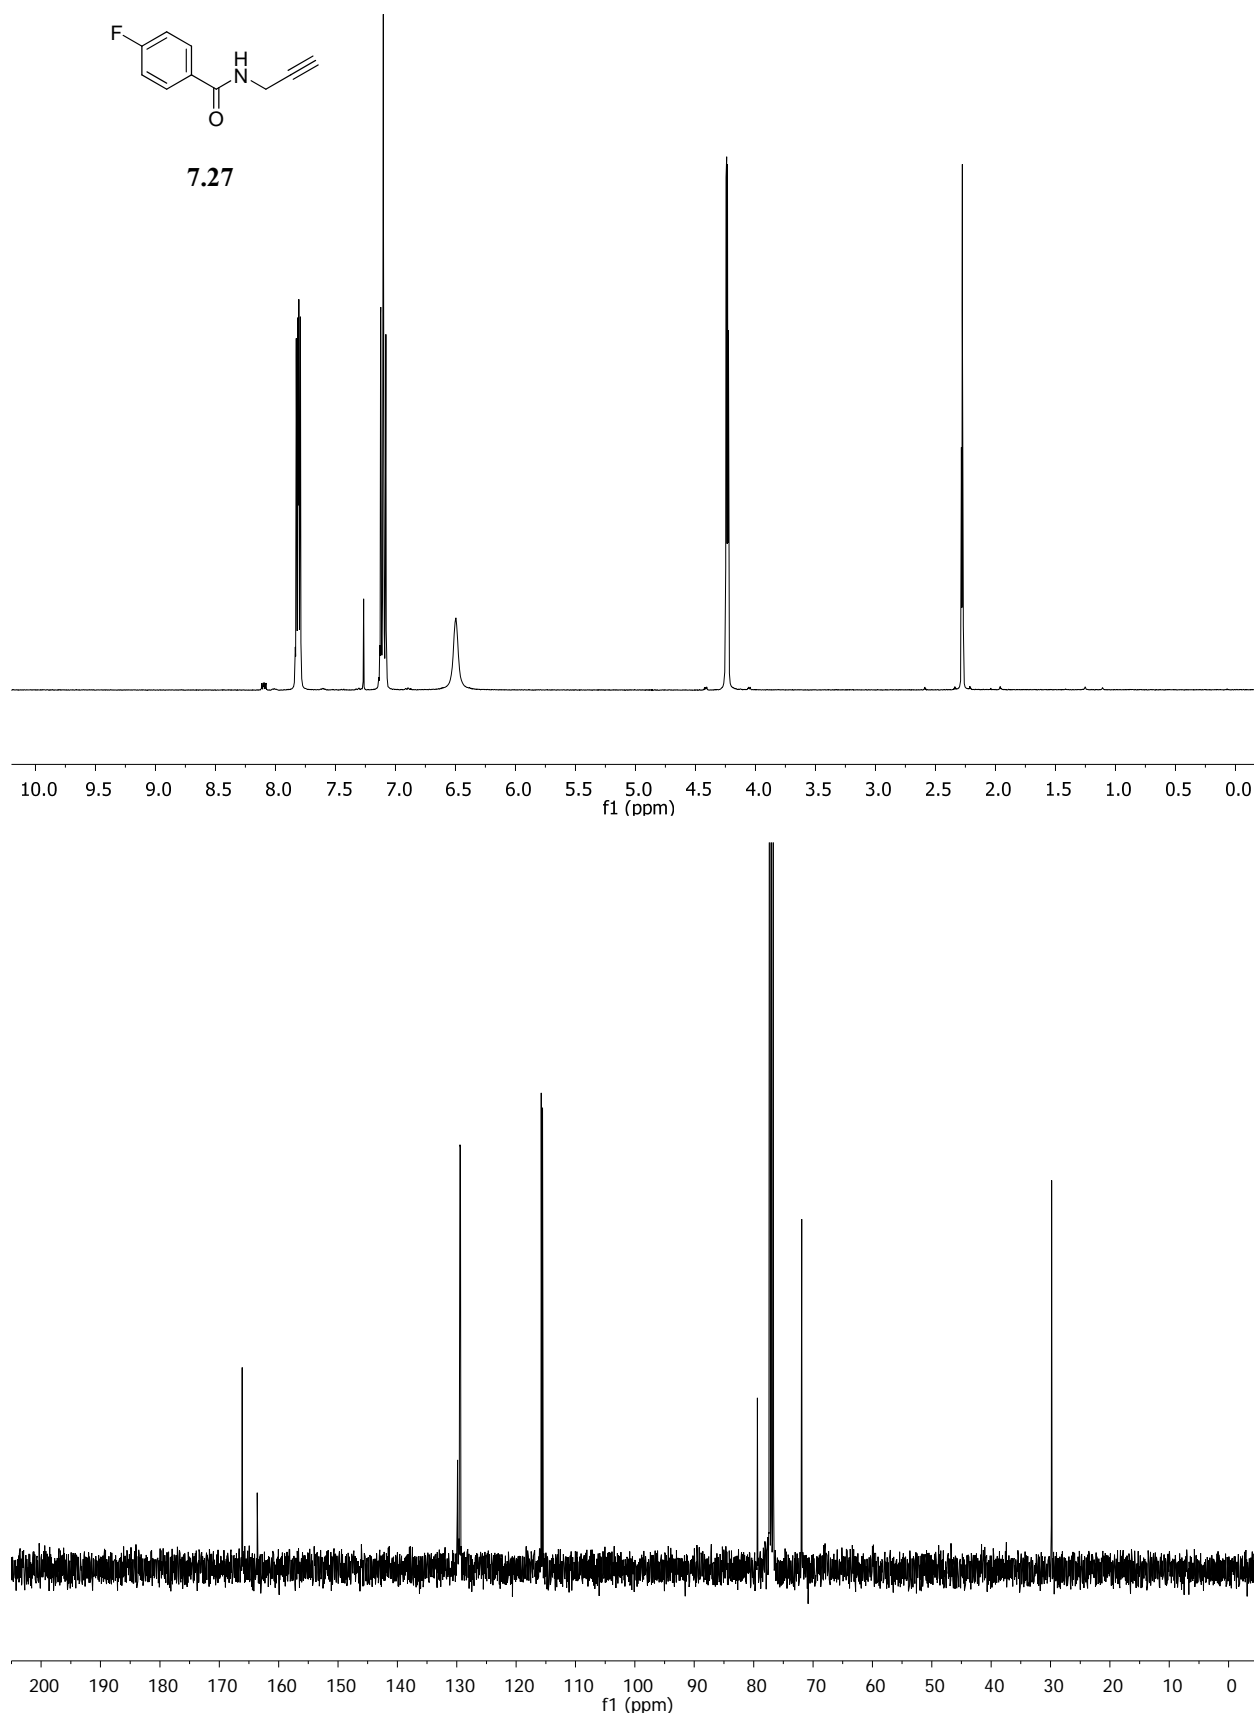

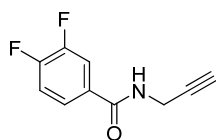

7.28

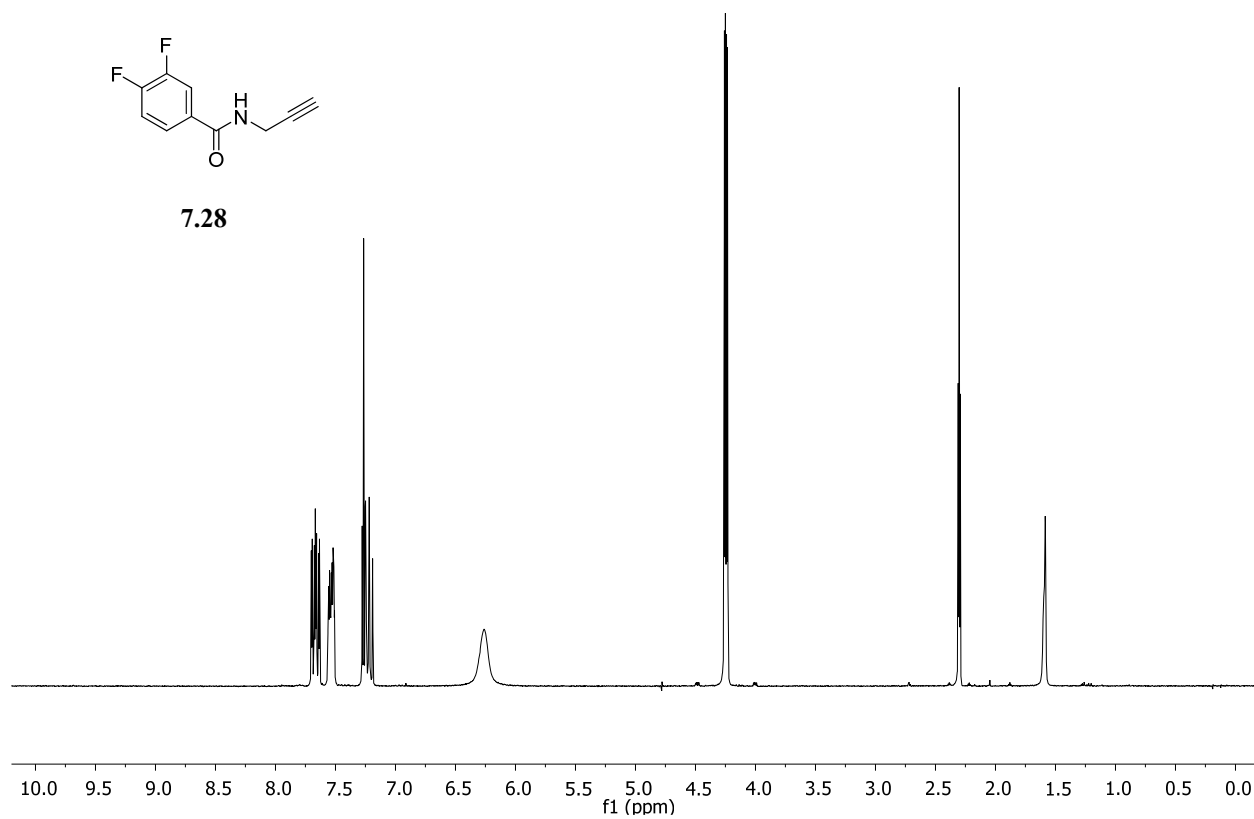

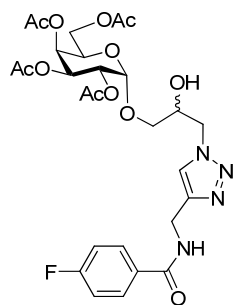

**12**

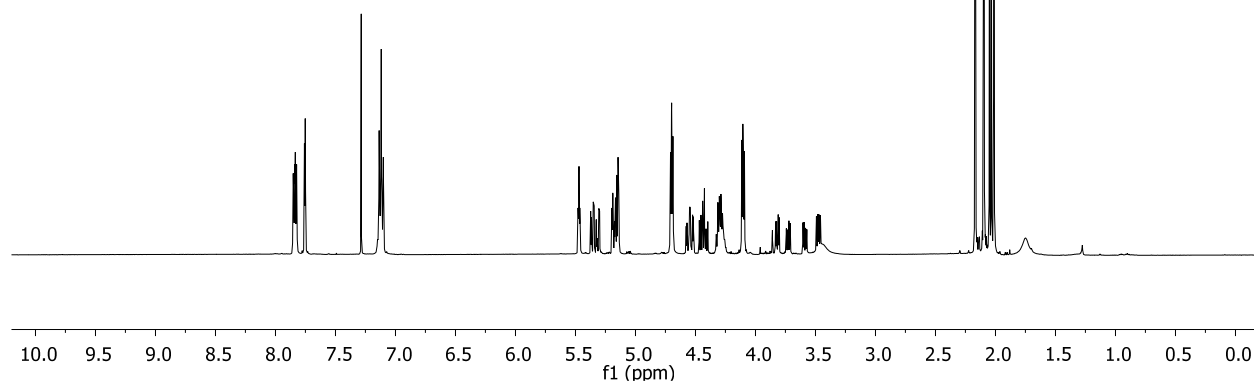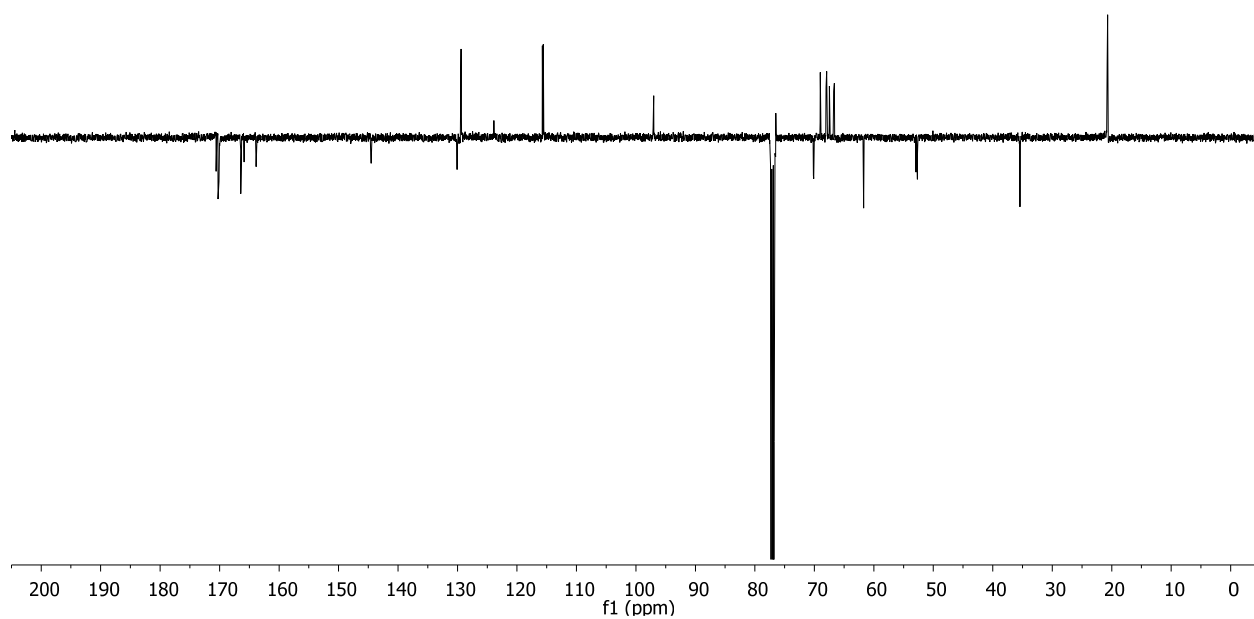



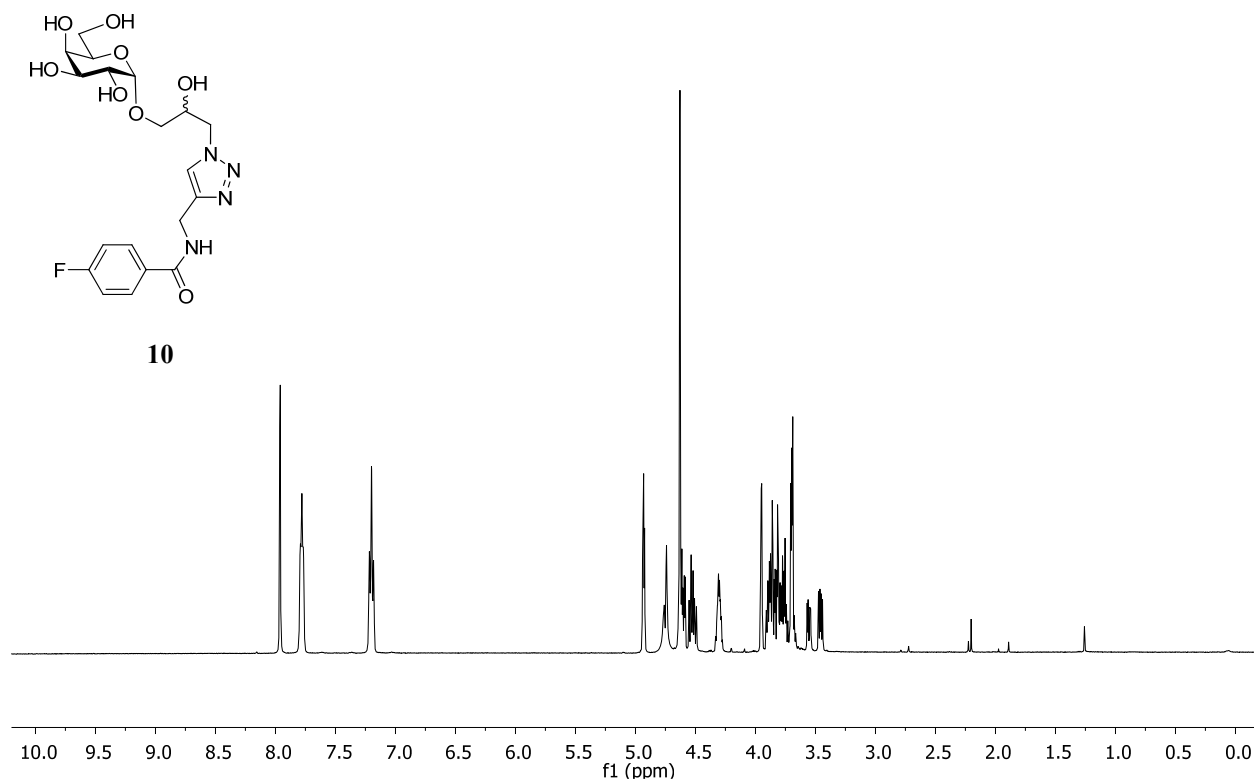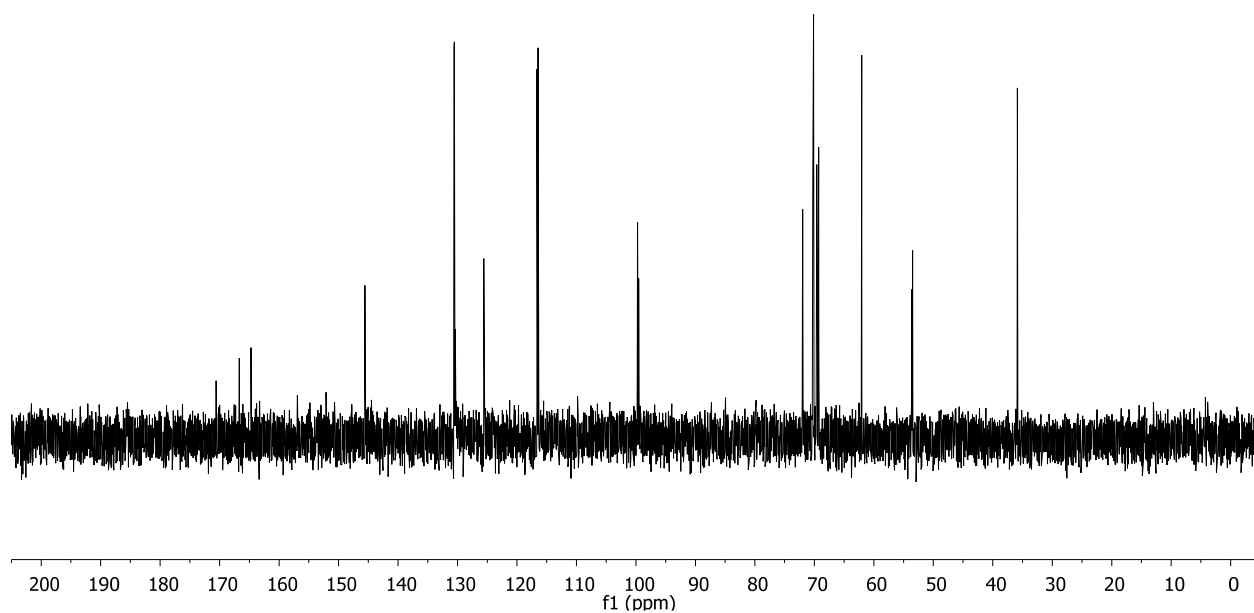

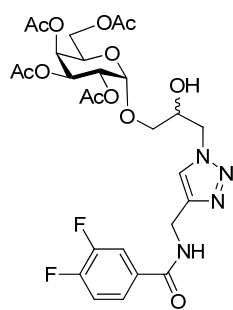

**13**

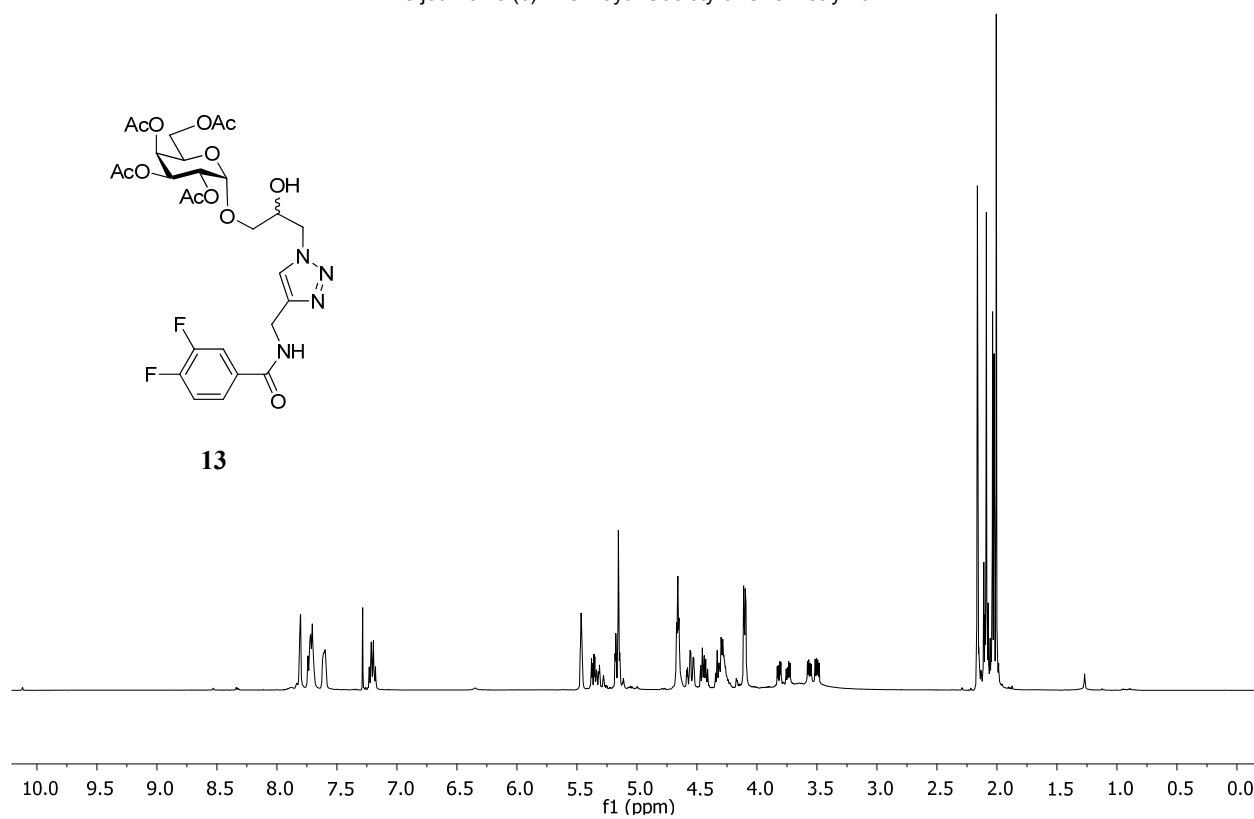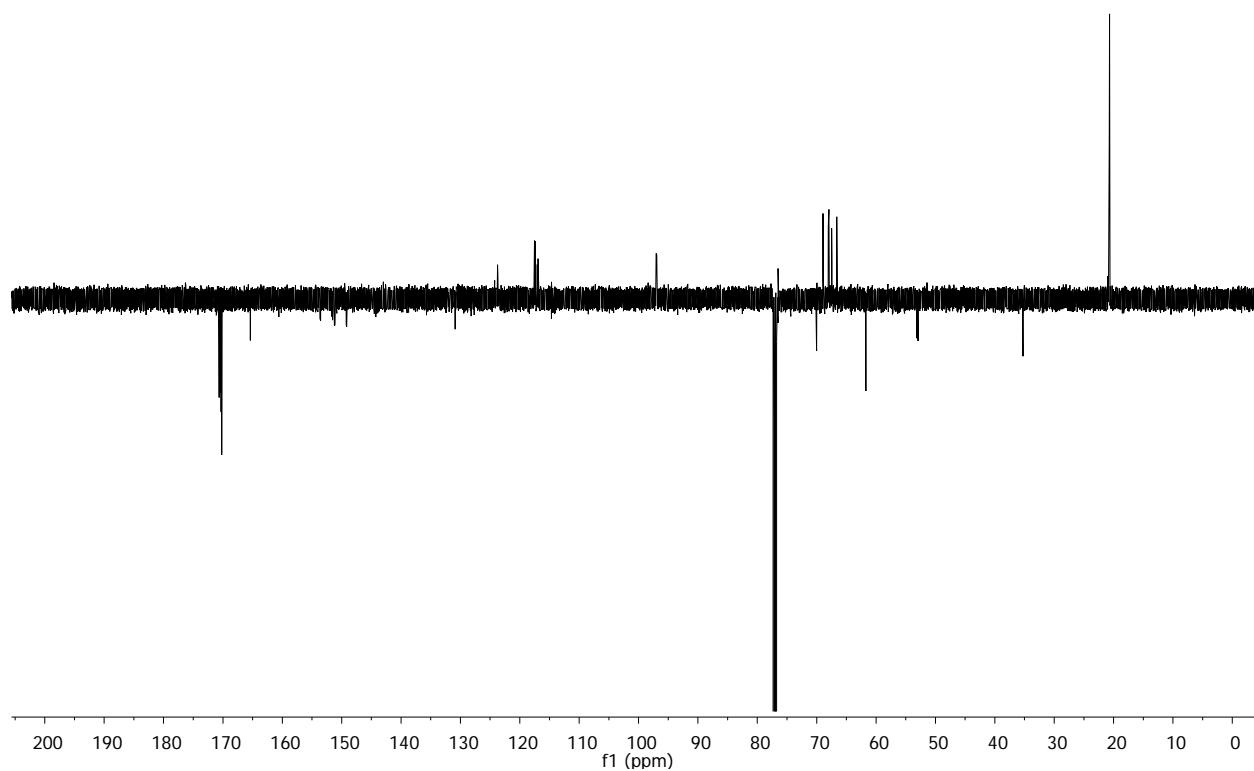

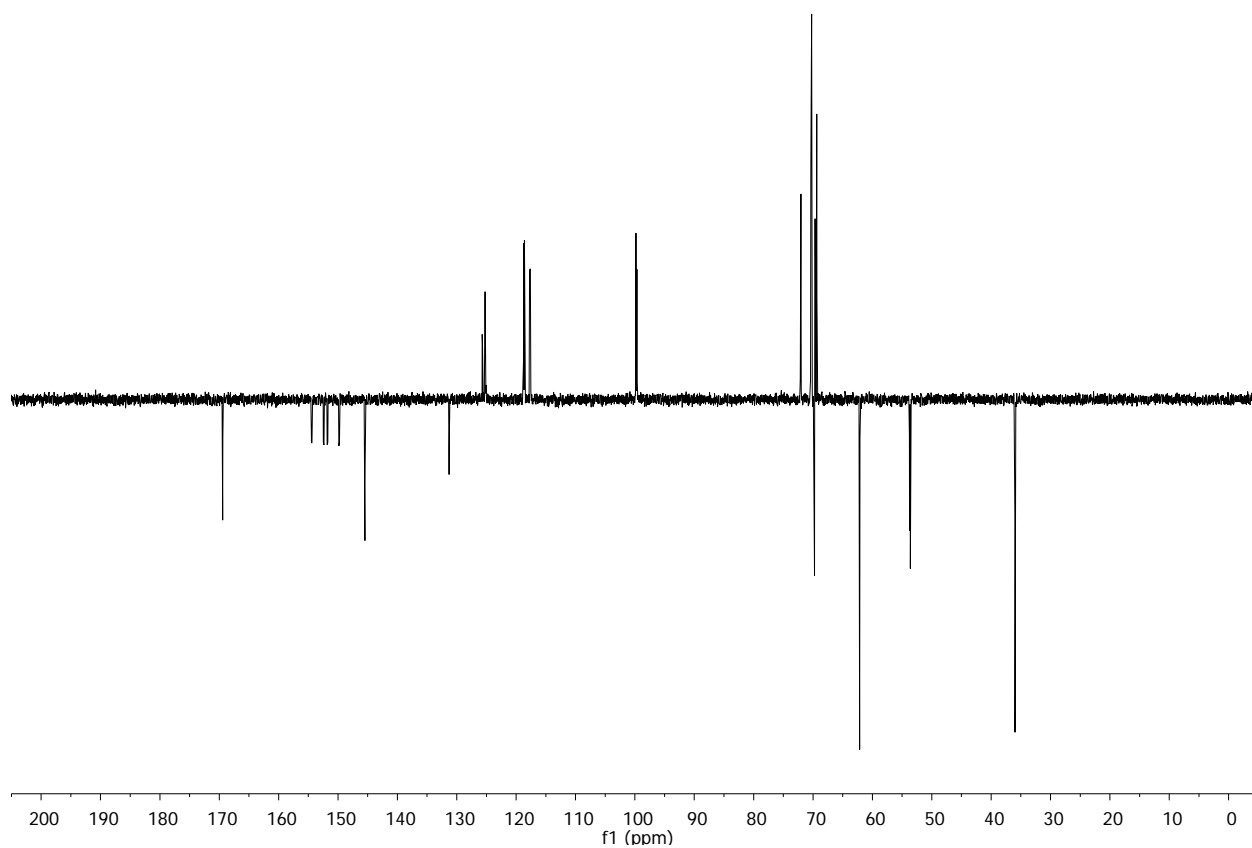

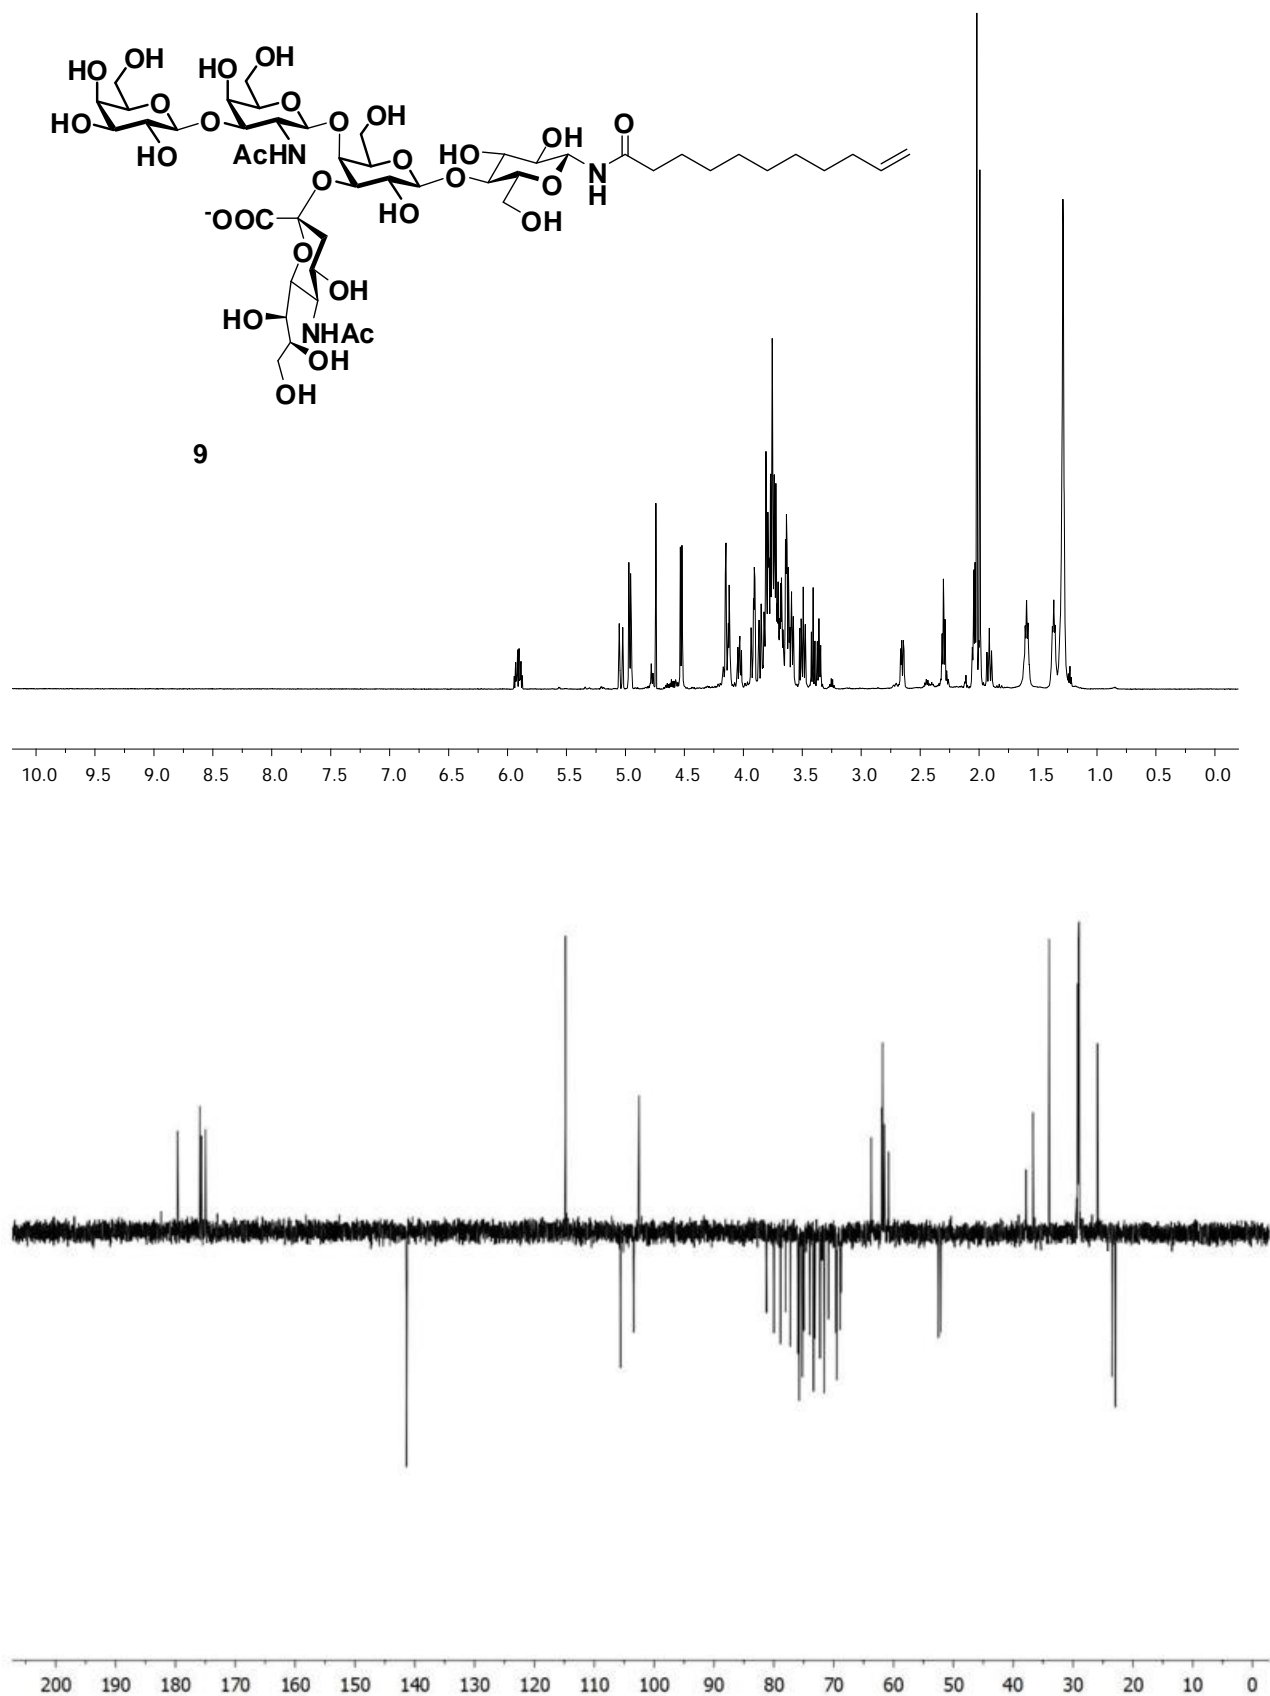

Supplement: c0ob01089h.pdf [file c0ob01089h.pdf]
